# Supplementary material for: Molecular Taxonomy of Phytopathogenic Fungi: A Case Study in Peronospora
Source: PLoS One. 2009 Jul 29;4(7):e6319. doi: 10.1371/journal.pone.0006319 (PMC2712678; doi:10.1371/journal.pone.0006319)

# **Supplementary Material to Göker, Garcia-Blazquez, Voglmayr, Telleria & Martin, "*Molecular taxonomy of phytopathogenic fungi - a case study in Peronospora*": Robustness of parameter identification in clustering optimization**

**Figures 1-5: Experiments with taxon jackknifing to test for robustness regarding taxon sampling if the taxonomy-based reference partition is used.** A defined proportion of the sequences was removed before optimizing the parameters. Sequences to be removed were selected at random in each of the 1,000 taxon jackknifing replicates.

Figure 1: Dependency of the smallest optimal F values on the proportion of sequences randomly deleted before optimization.

Figure 2: Dependency of the largest optimal F values on the proportion of sequences randomly deleted before optimization.

Figure 3: Dependency of the smallest optimal threshold values on the proportion of sequences randomly deleted before optimization.

Figure 4: Dependency of the largest optimal threshold values on the proportion of sequences randomly deleted before optimization.

Figure 5: Dependency of obtained MRI values on the proportion of sequences randomly deleted before optimization.

**Figures 6-10: Experiments with random permutations to test for robustness regarding the taxonomy-based reference partition.** A defined proportion of errors was introduced in the reference partition before optimizing the parameters. Errors to be introduced were selected at random in each of the 1,000 replicates.

Figure 6: Dependency of the smallest optimal F values on the proportion of errors randomly introduced before optimization.

Figure 7: Dependency of the largest optimal F values on the proportion of errors randomly introduced before optimization.

Figure 8: Dependency of the smallest optimal threshold values on the proportion of errors randomly introduced before optimization.

Figure 9: Dependency of the largest optimal threshold values on the proportion of errors randomly introduced before optimization.

Figure 10: Dependency of obtained MRI values on the proportion of errors randomly introduced before optimization.

**Figures 11-15: Experiments with taxon jackknifing to test for robustness regarding taxon sampling if the host-based reference partition is used.** A defined proportion of the sequences was removed before optimizing the parameters. Sequences to be removed were selected at random in each of the 1,000 taxon jackknifing replicates.

Figure 11: Dependency of the smallest optimal F values on the proportion of sequences randomly deleted before optimization.

Figure 12: Dependency of the largest optimal F values on the proportion of sequences randomly deleted before optimization.

Figure 13: Dependency of the smallest optimal threshold values on the proportion of sequences randomly deleted before optimization.

Figure 14: Dependency of the largest optimal threshold values on the proportion of sequences randomly deleted before optimization.

Figure 15: Dependency of obtained MRI values on the proportion of sequences randomly deleted before optimization.

**Figures 16-20: Experiments with random permutations to test for robustness regarding the taxonomy-based reference partition.** A defined proportion of errors was introduced in the reference partition before optimizing the parameters. Errors to be introduced were selected at random in each of the 1,000 replicates.

Figure 16: Dependency of the smallest optimal F values on the proportion of errors randomly introduced before optimization.

Figure 17: Dependency of the largest optimal F values on the proportion of errors randomly introduced before optimization.

Figure 18: Dependency of the smallest optimal threshold values on the proportion of errors randomly introduced before optimization.

Figure 19: Dependency of the largest optimal threshold values on the proportion of errors randomly introduced before optimization.

Figure 20: Dependency of obtained MRI values on the proportion of errors randomly introduced before optimization.

Figure 1

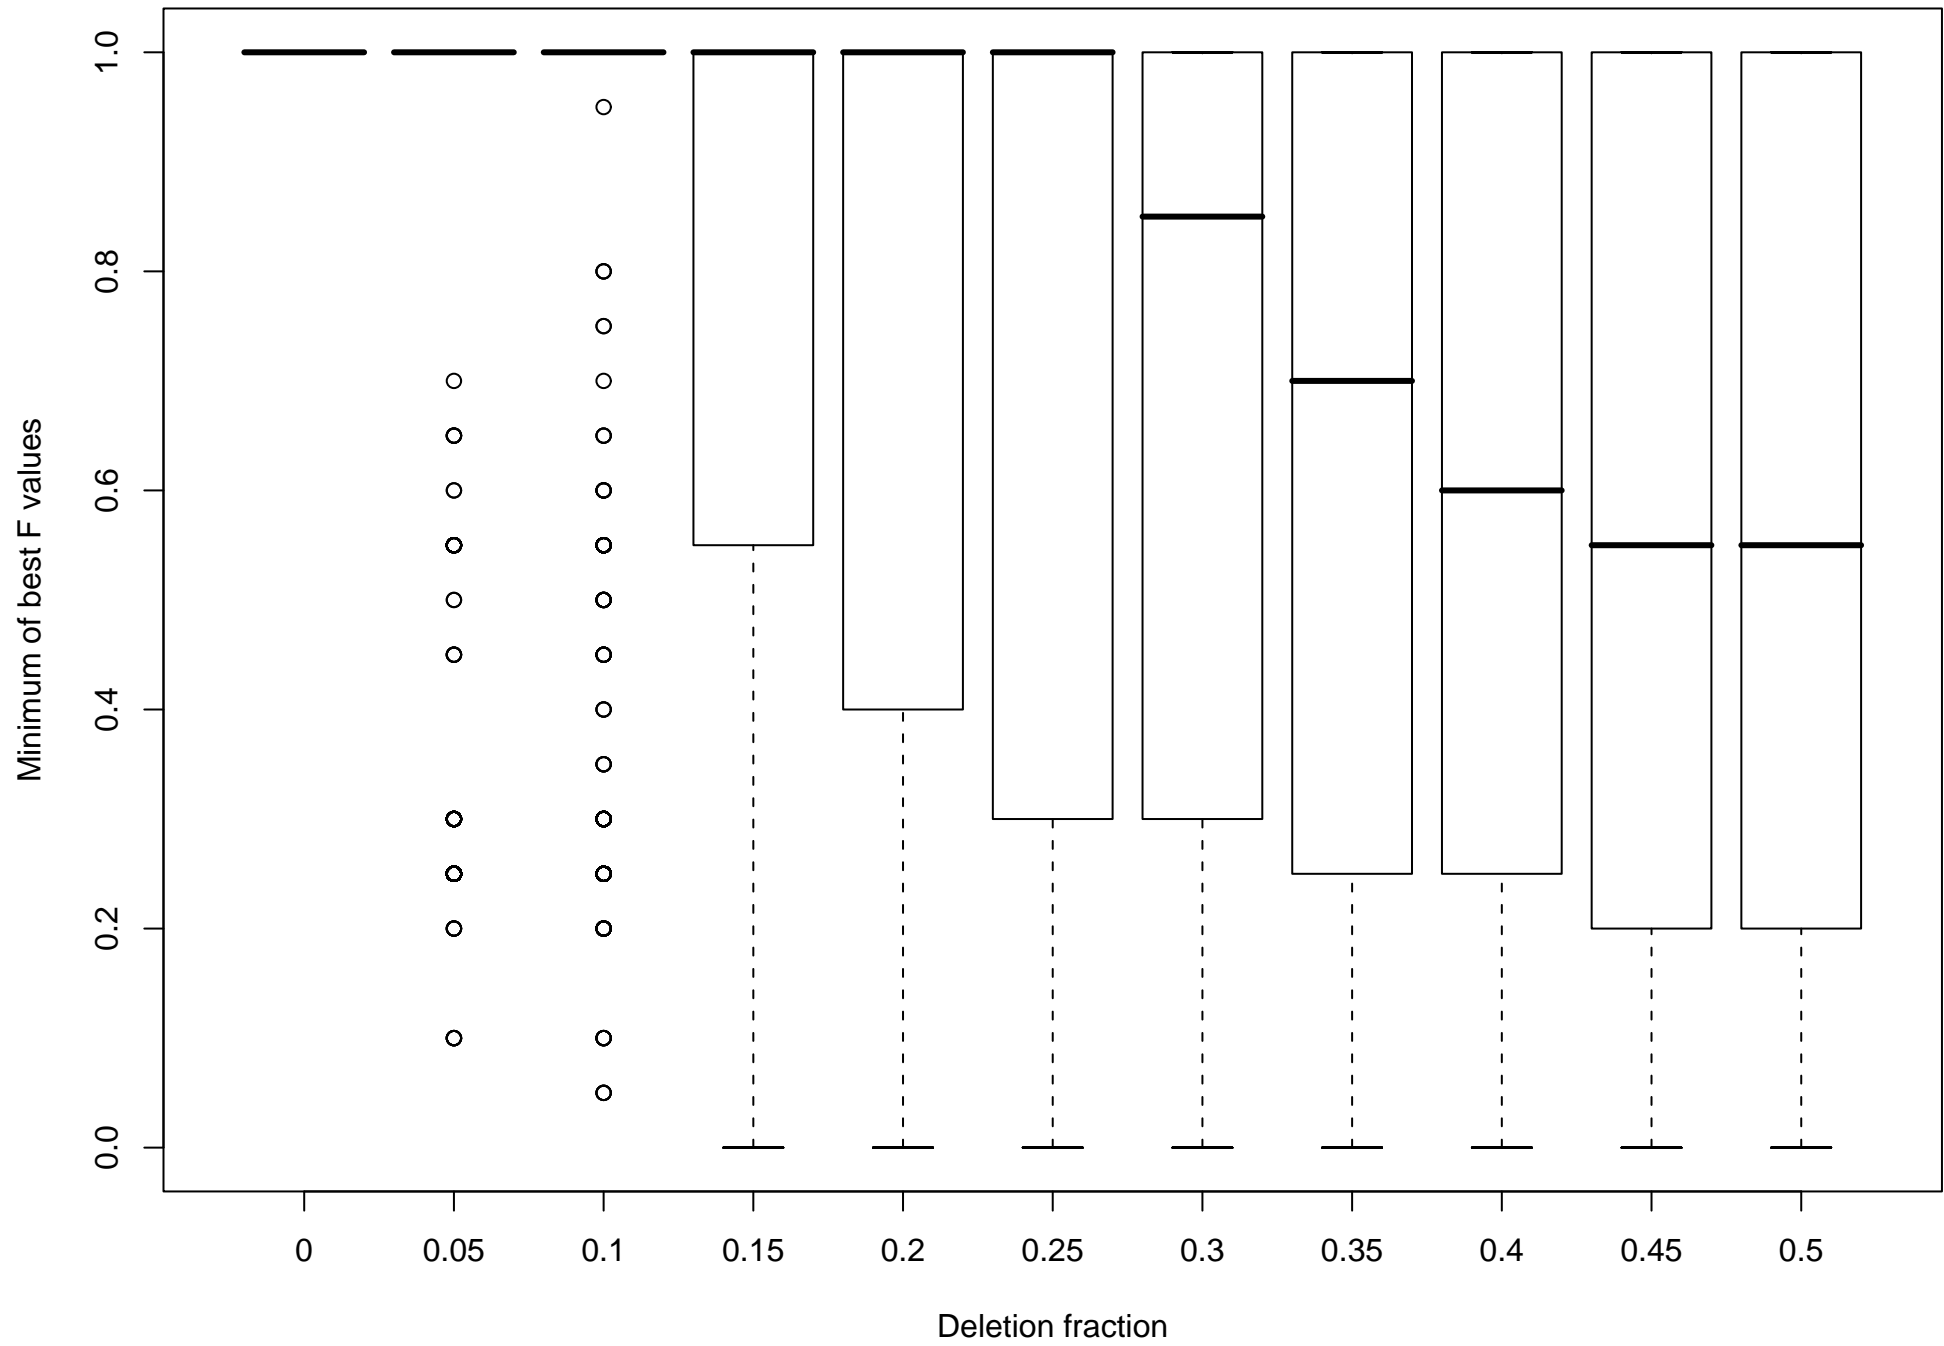

Figure 2

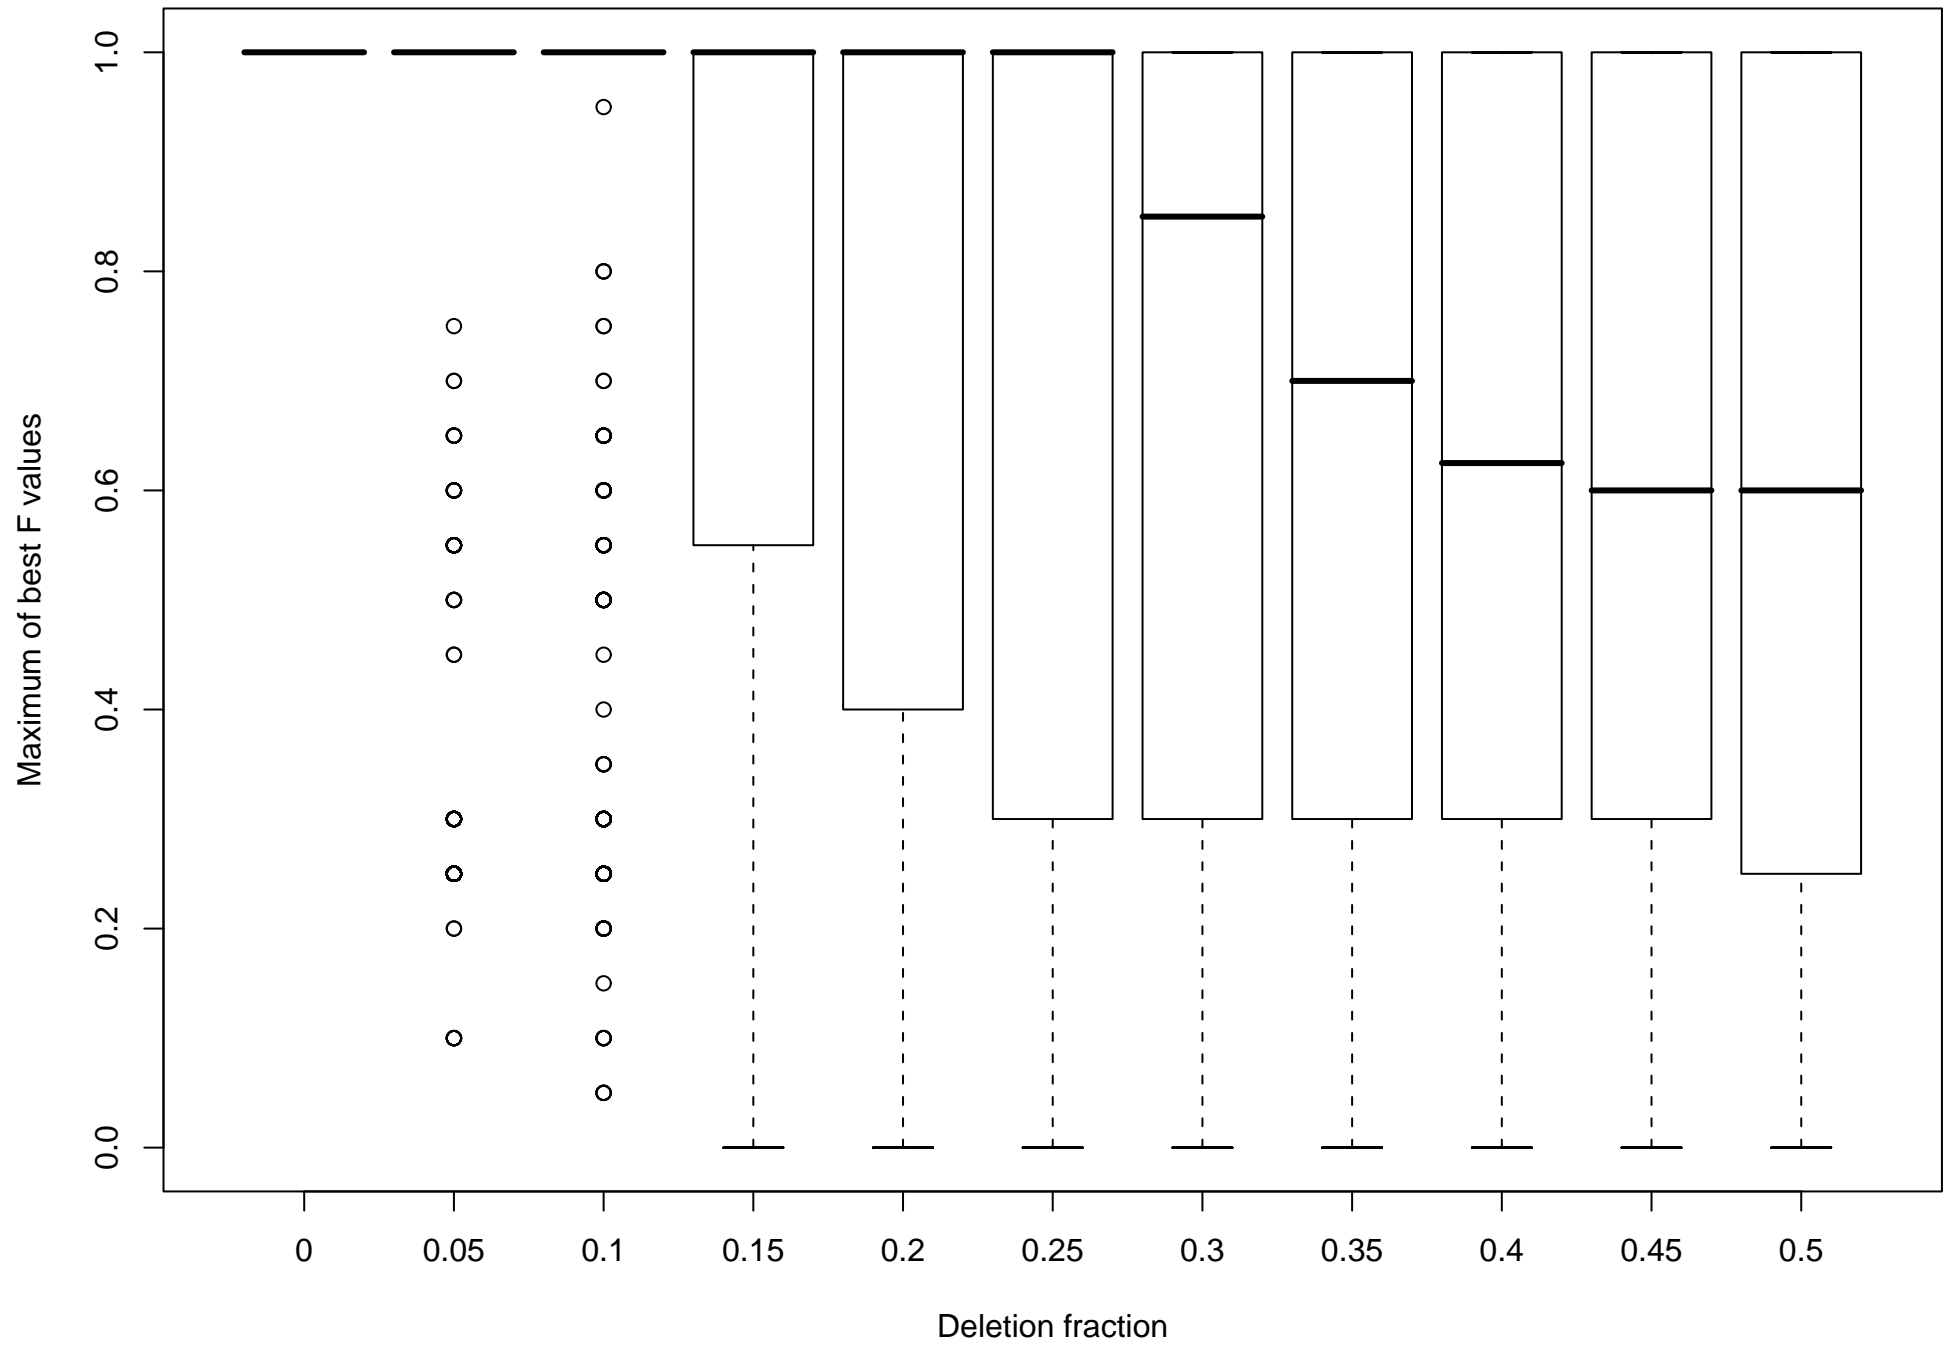

Figure 3

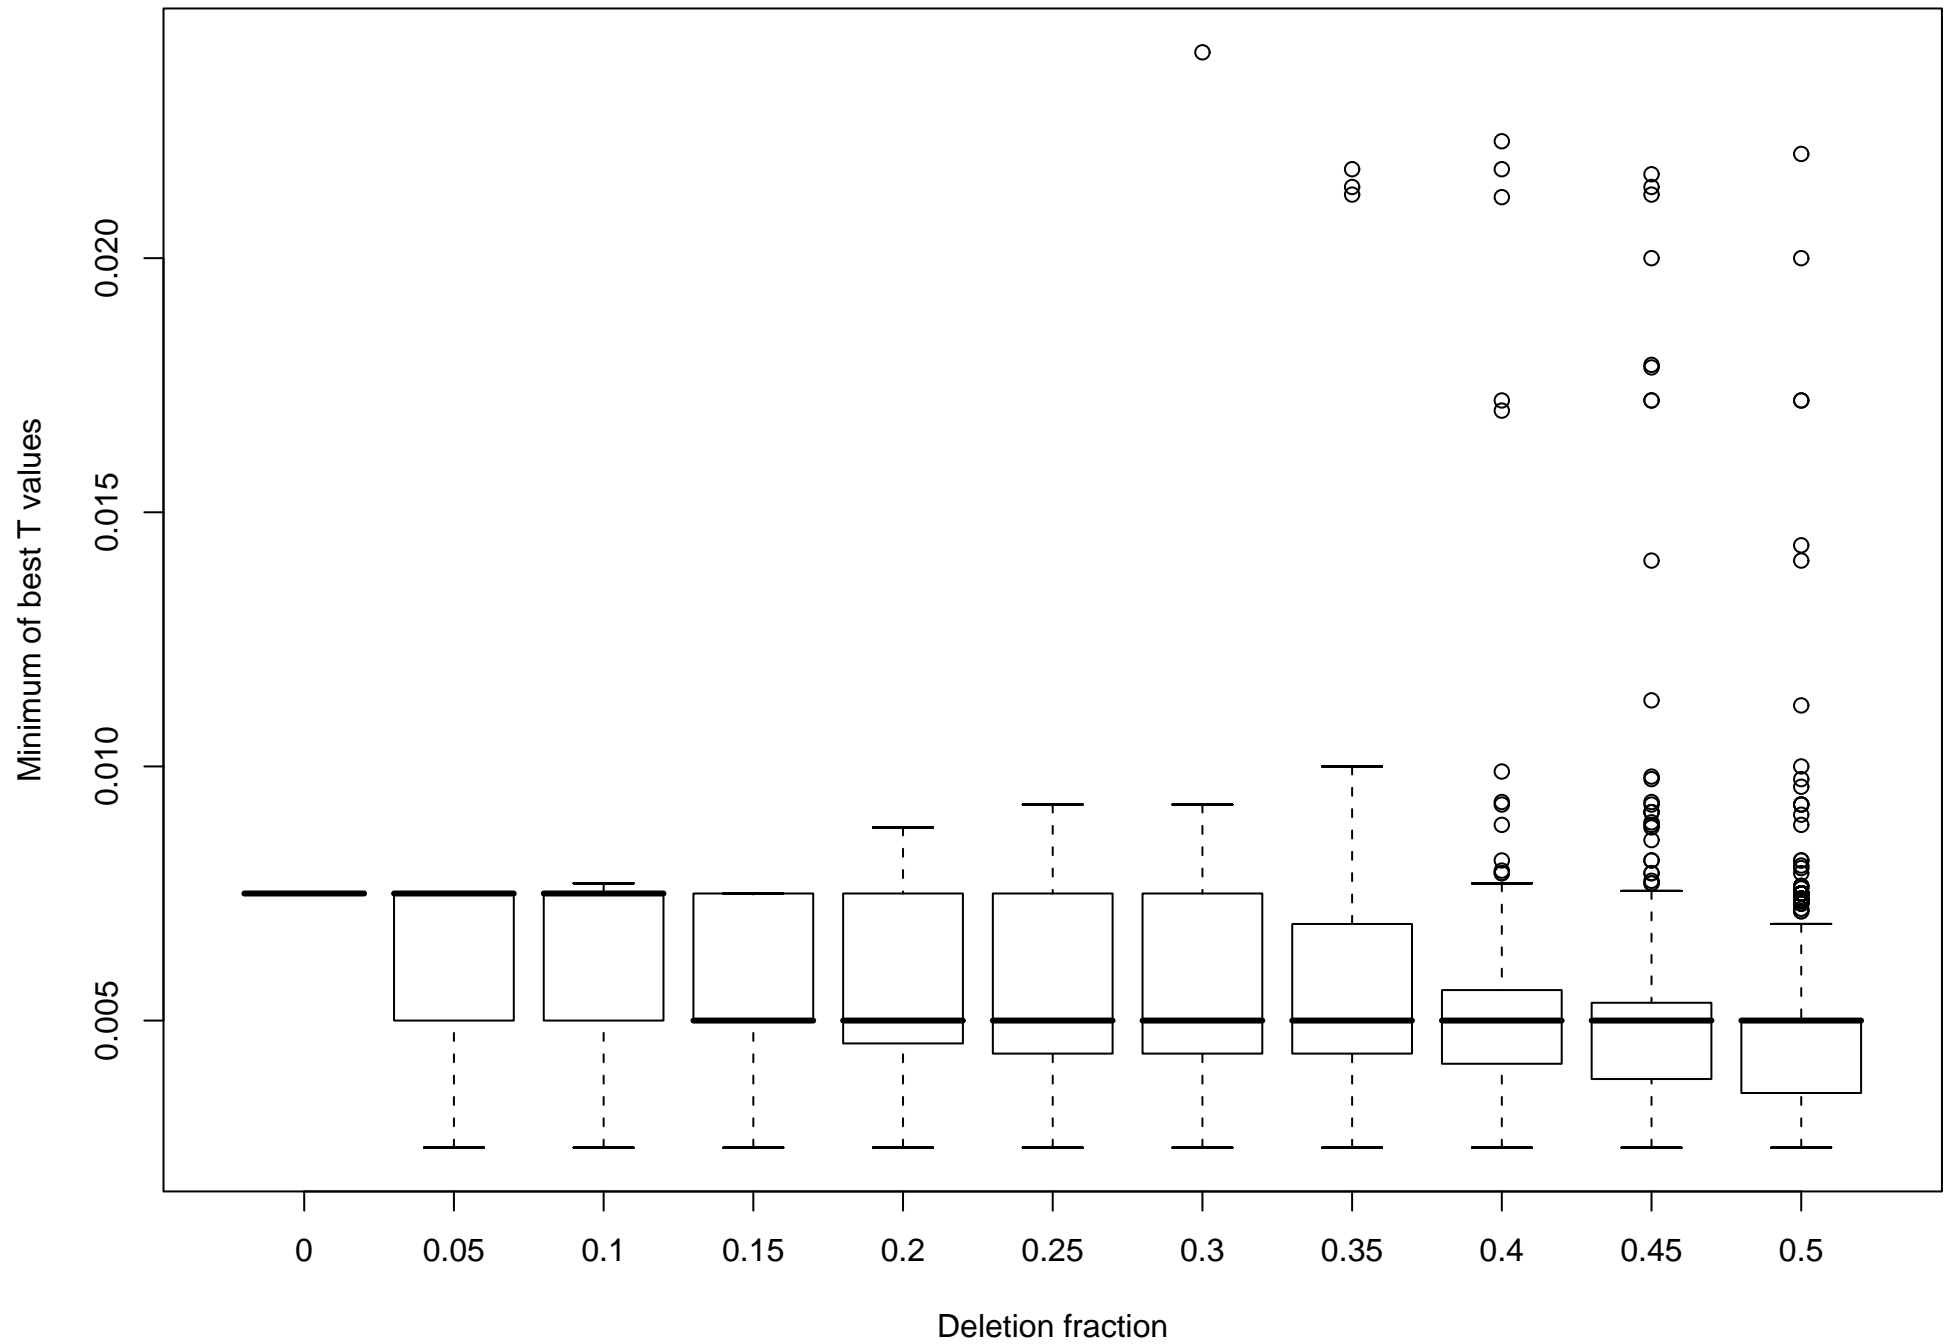

Figure 4

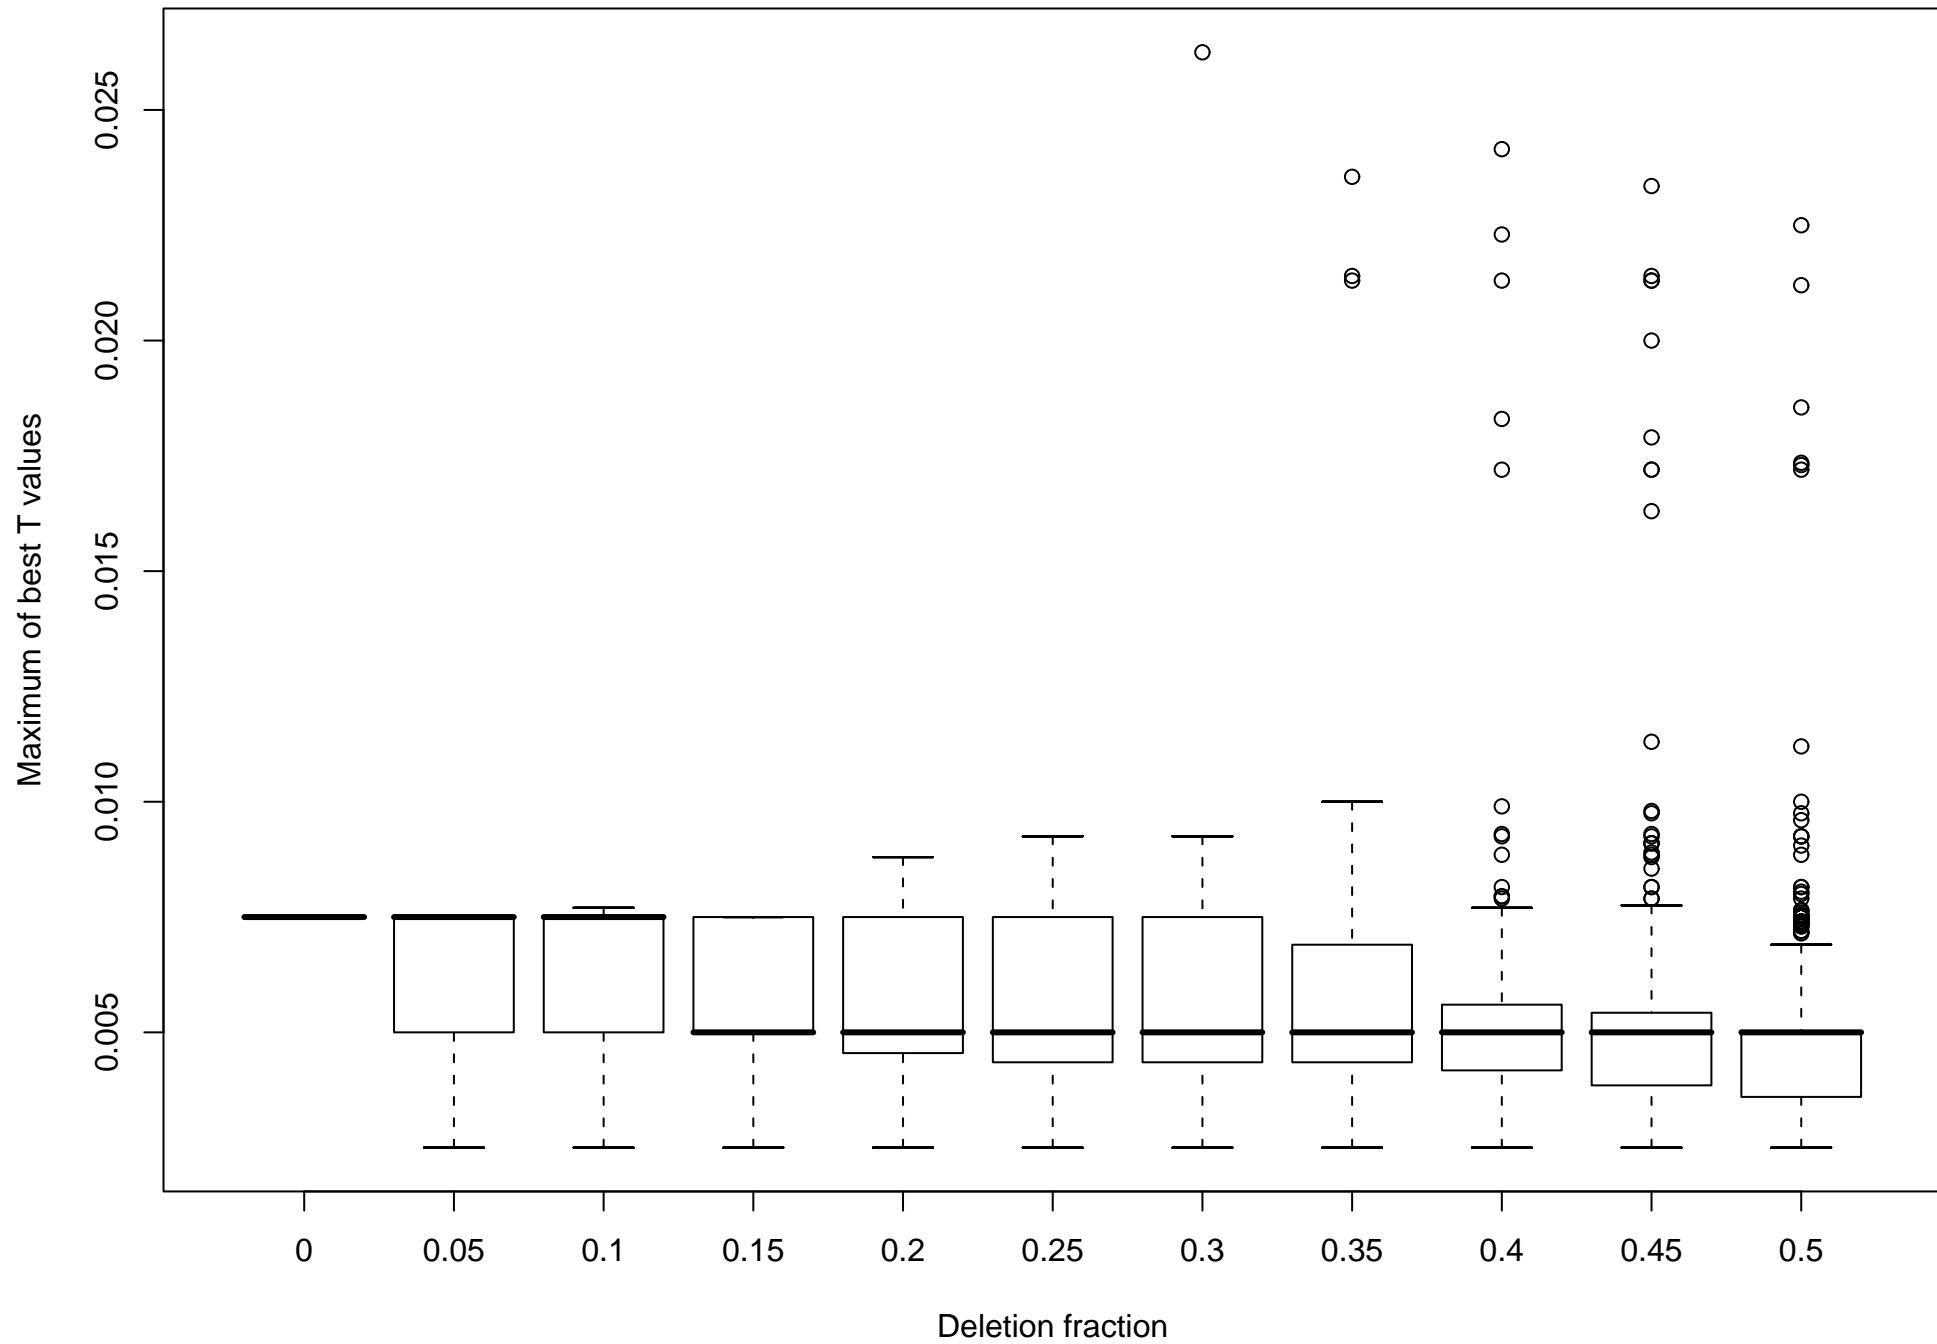

Figure 5

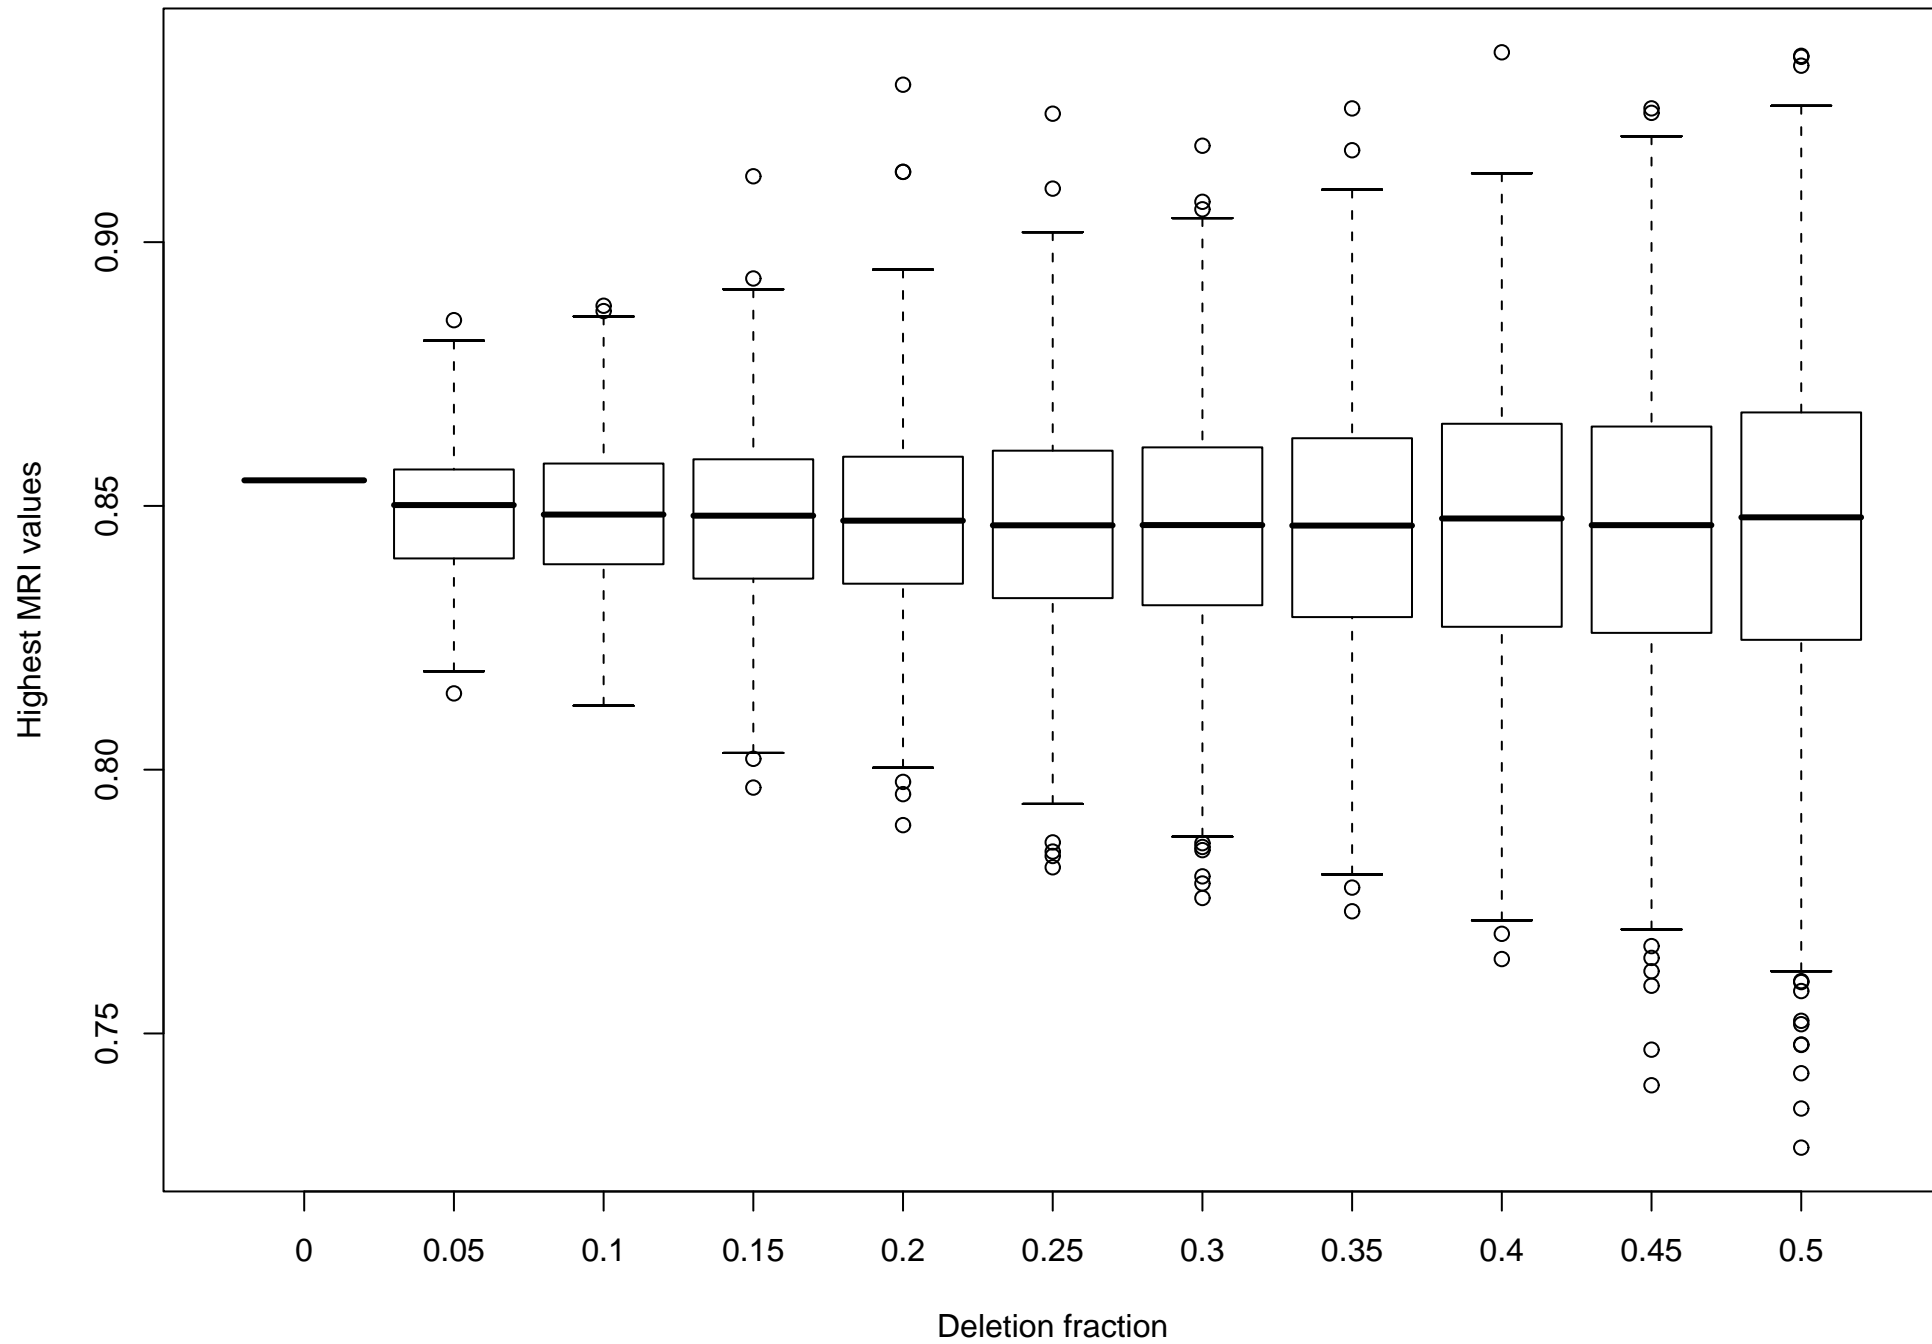

Figure 6

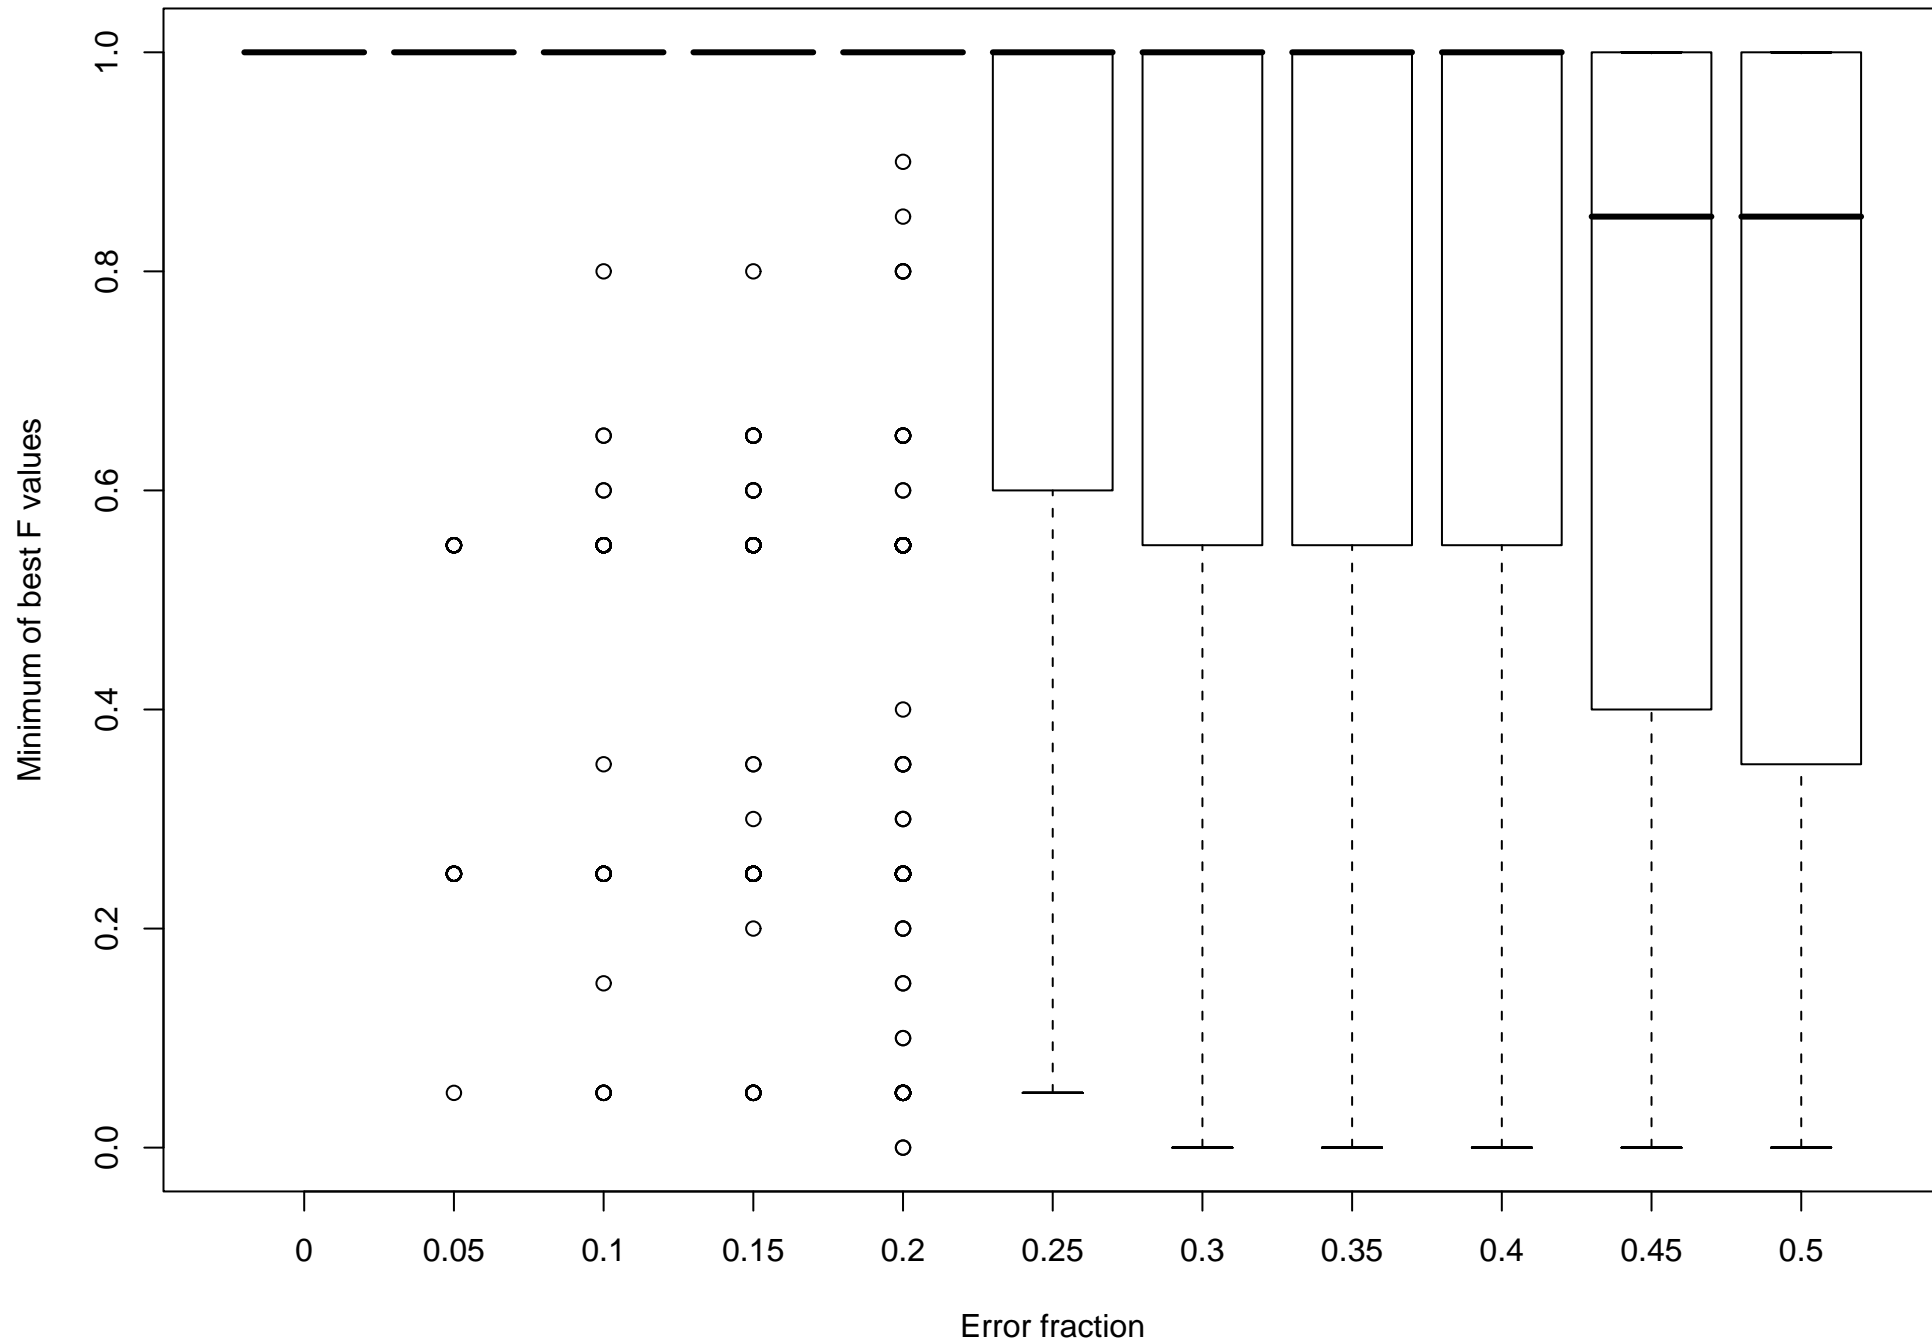

Figure 7

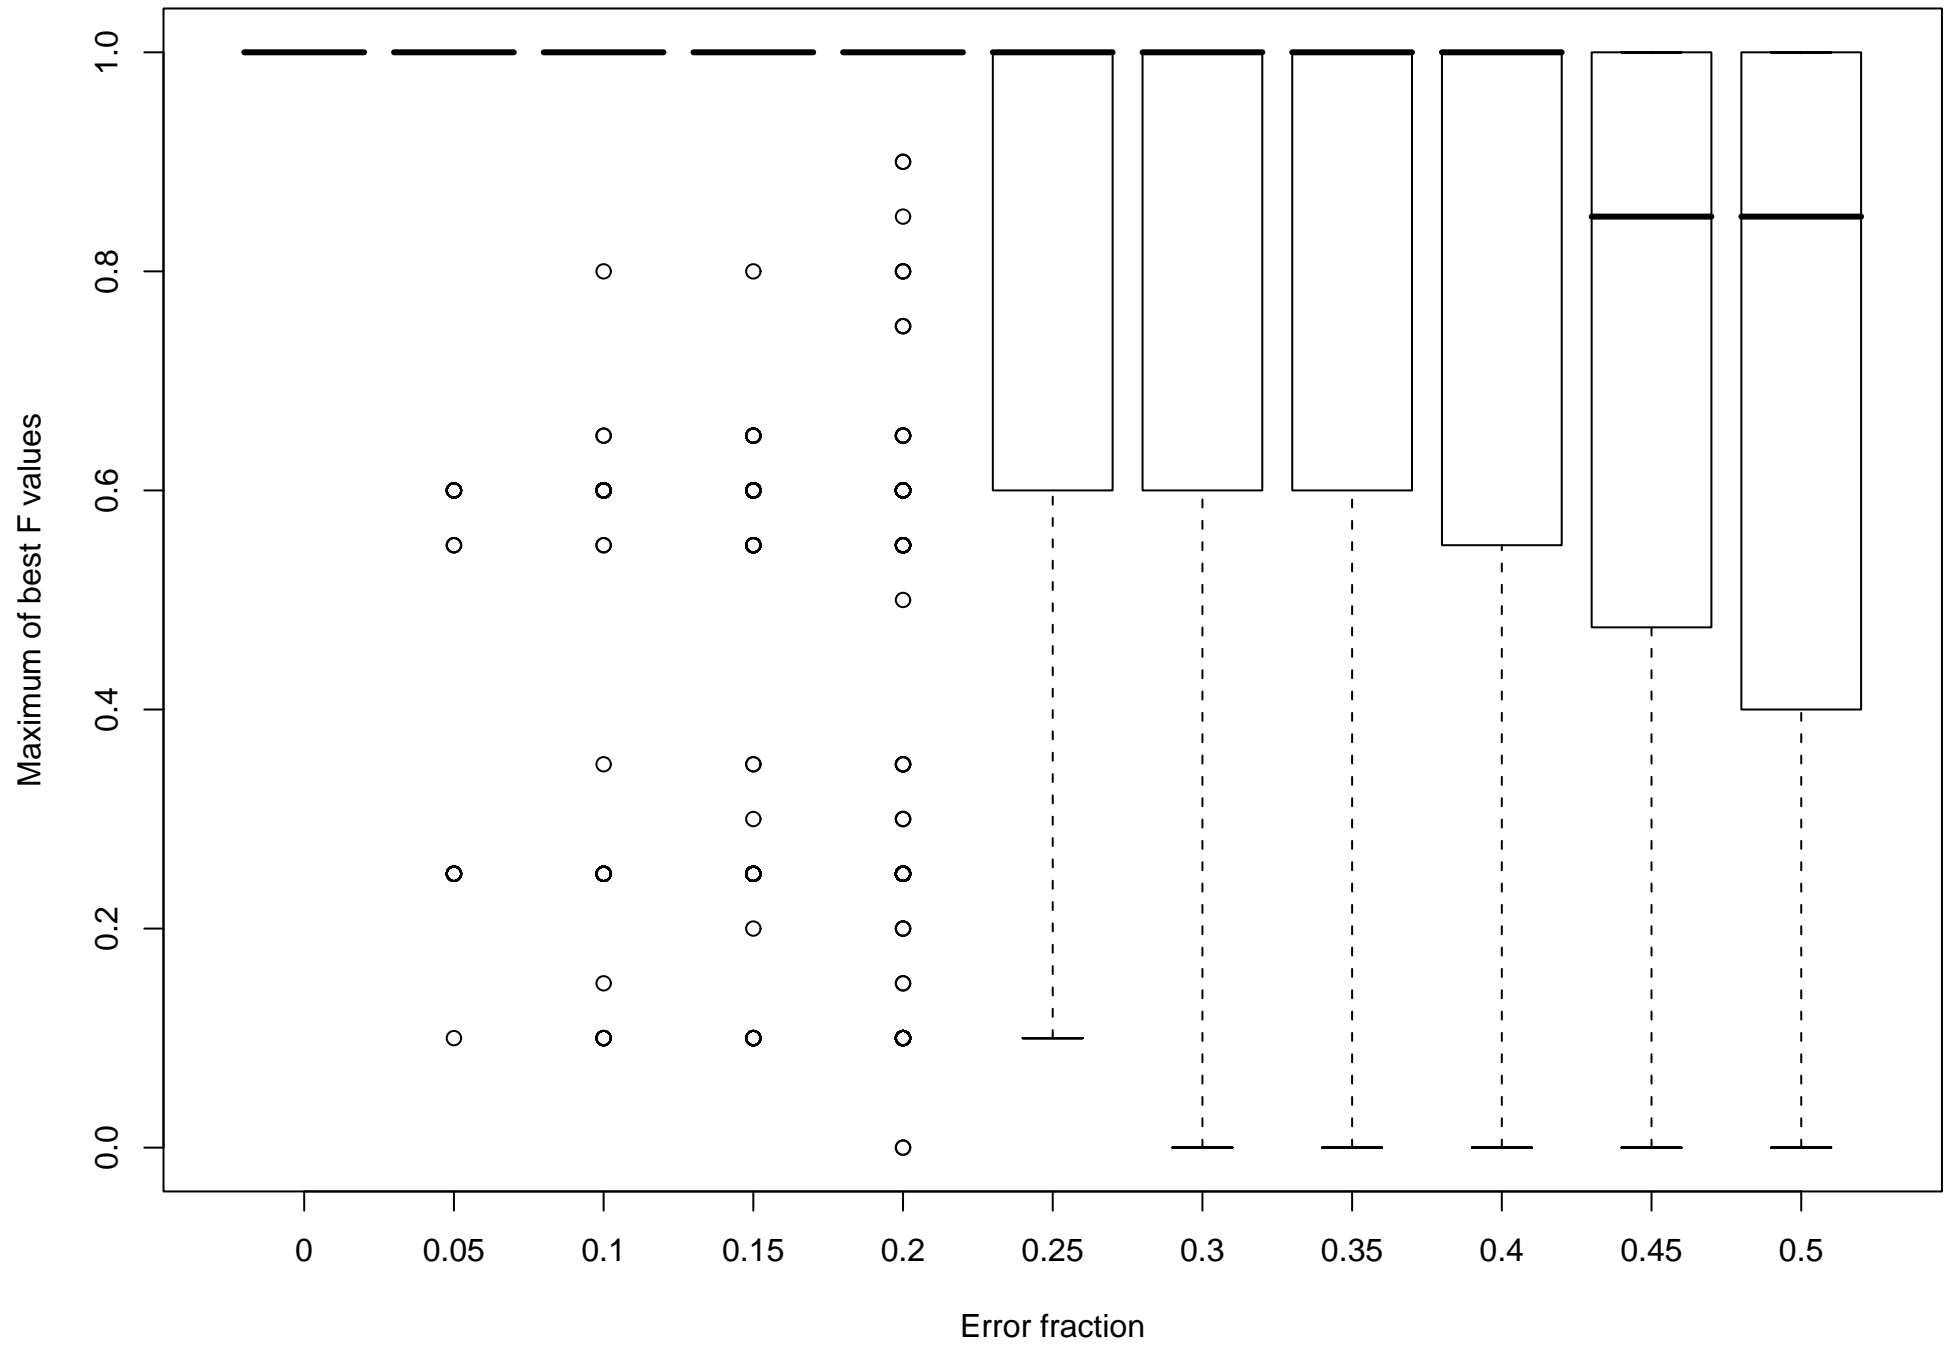

Figure 8

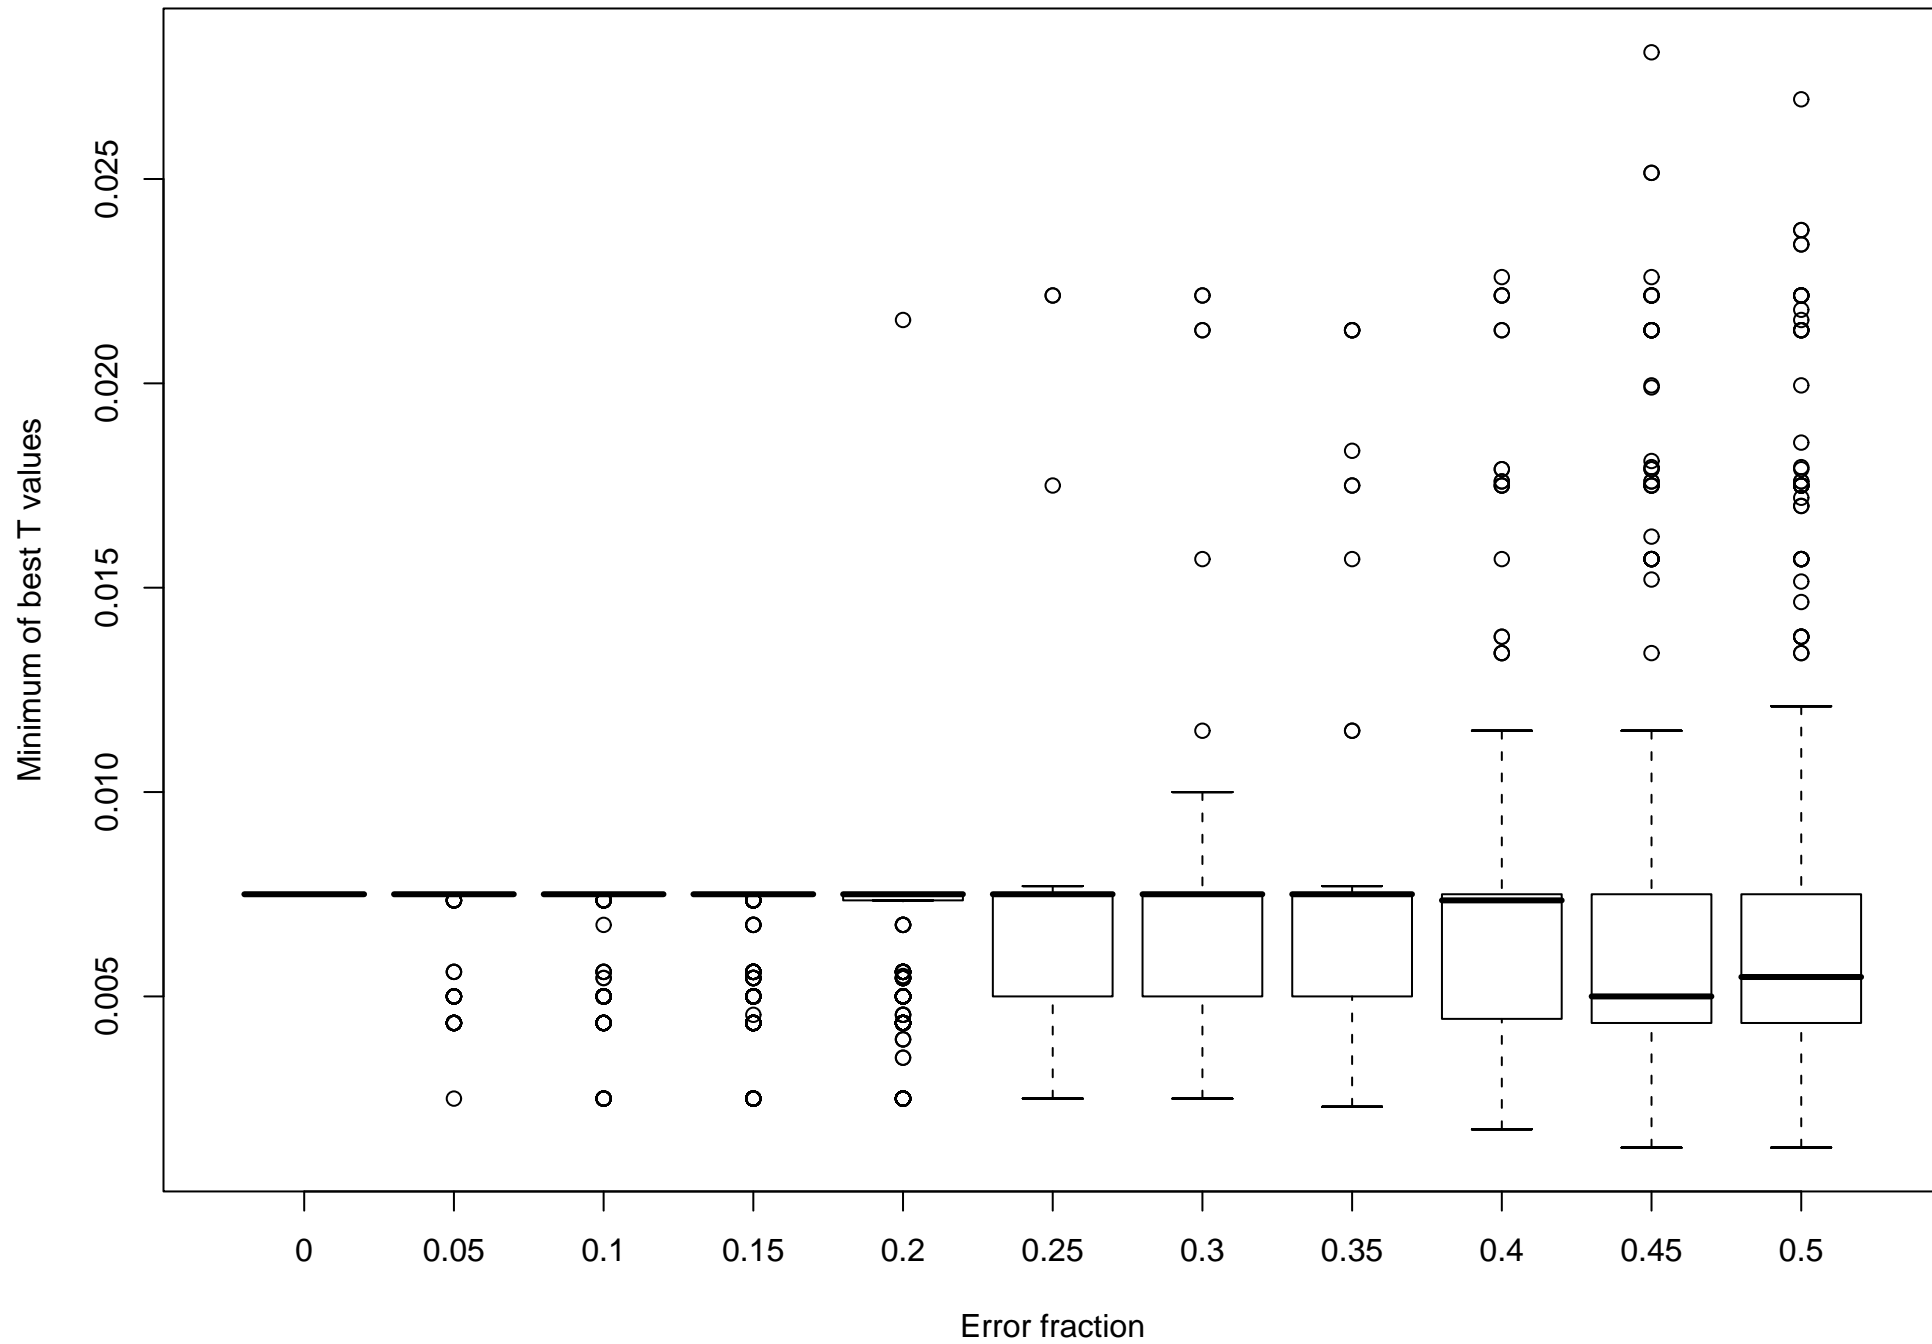

Figure 9

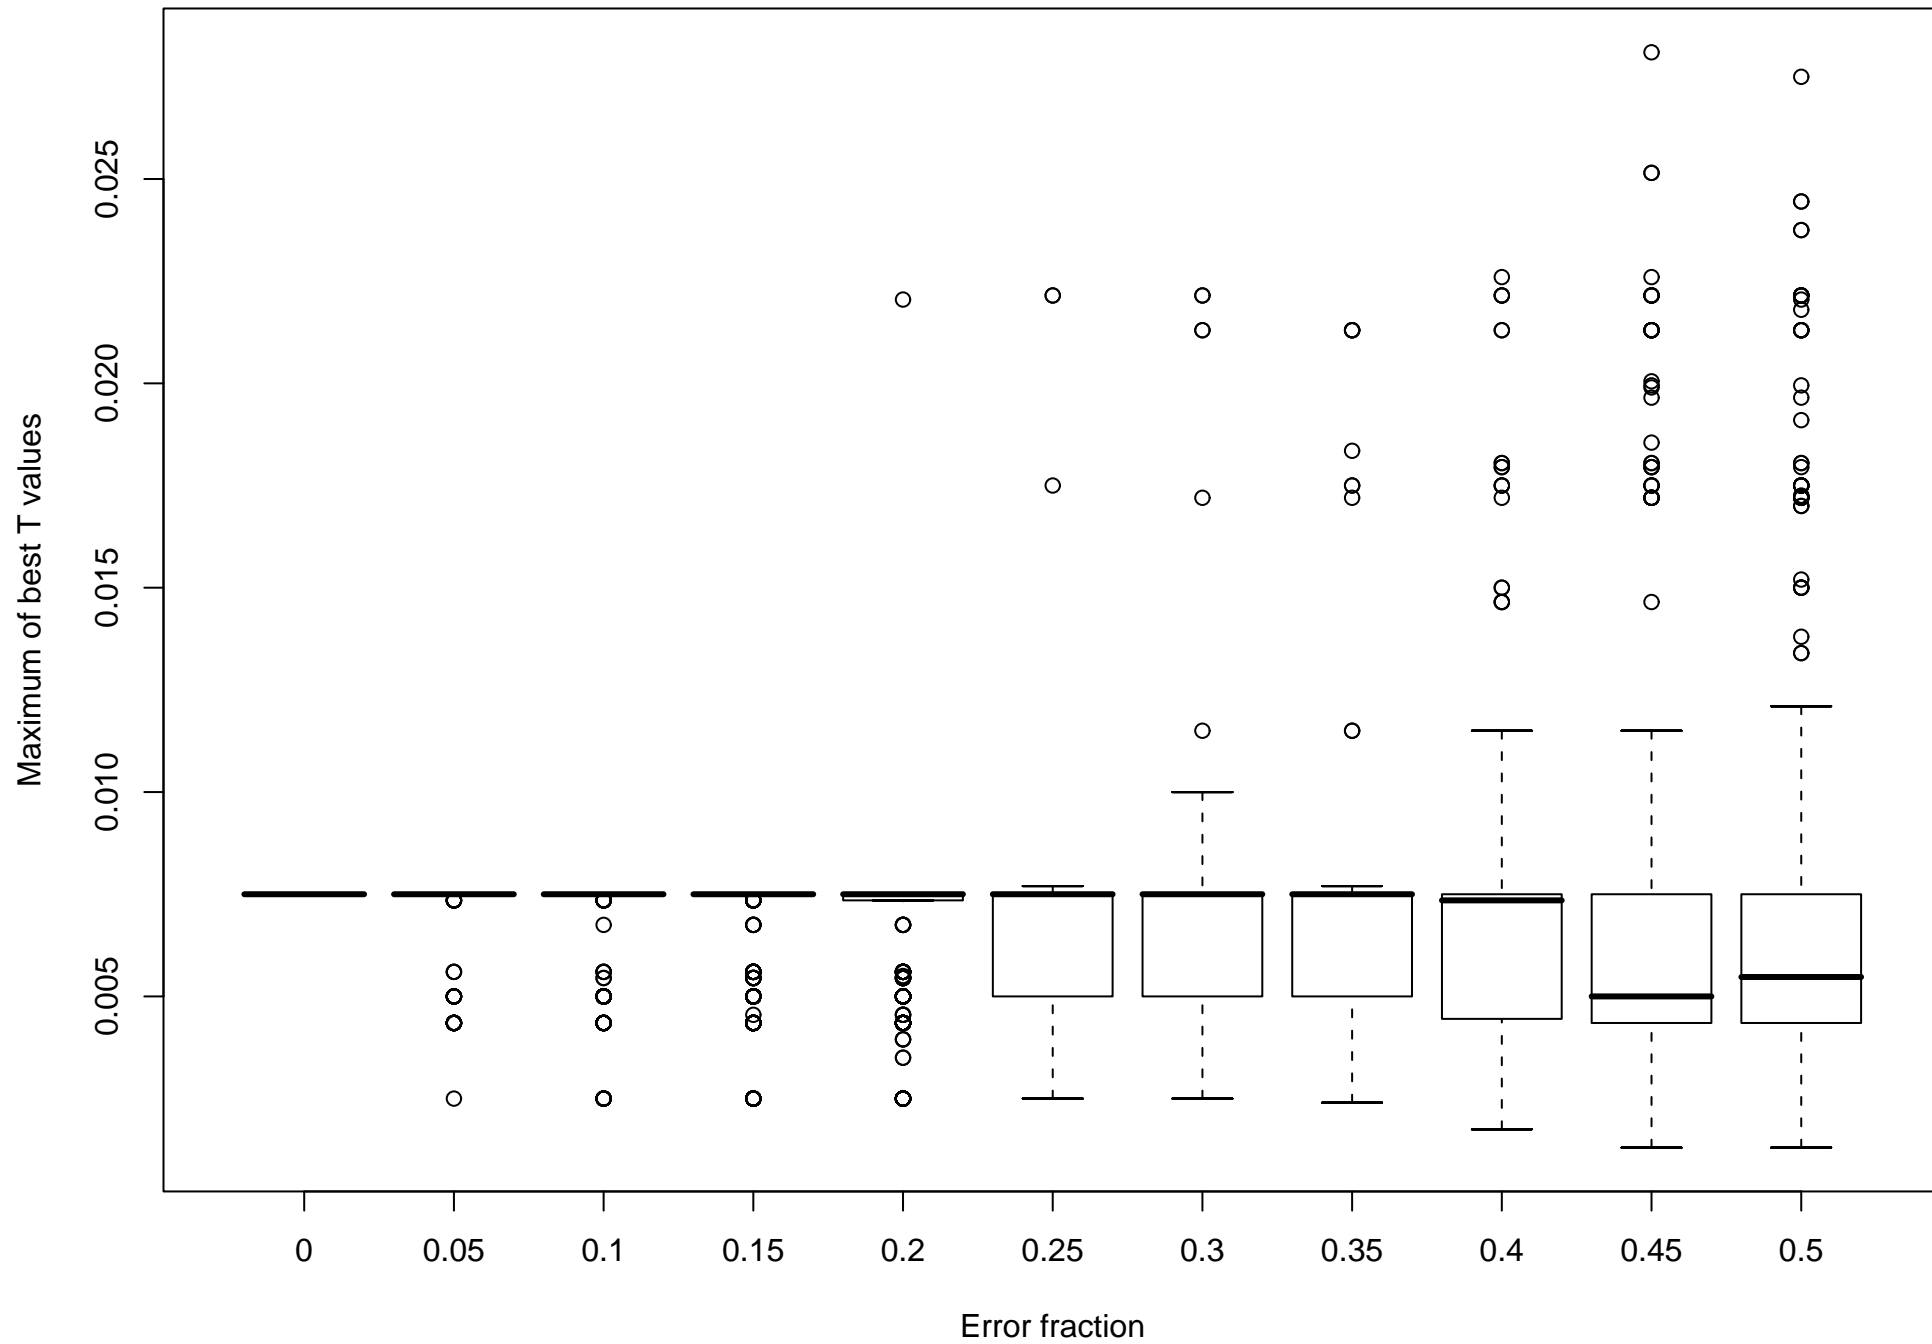

Figure 10

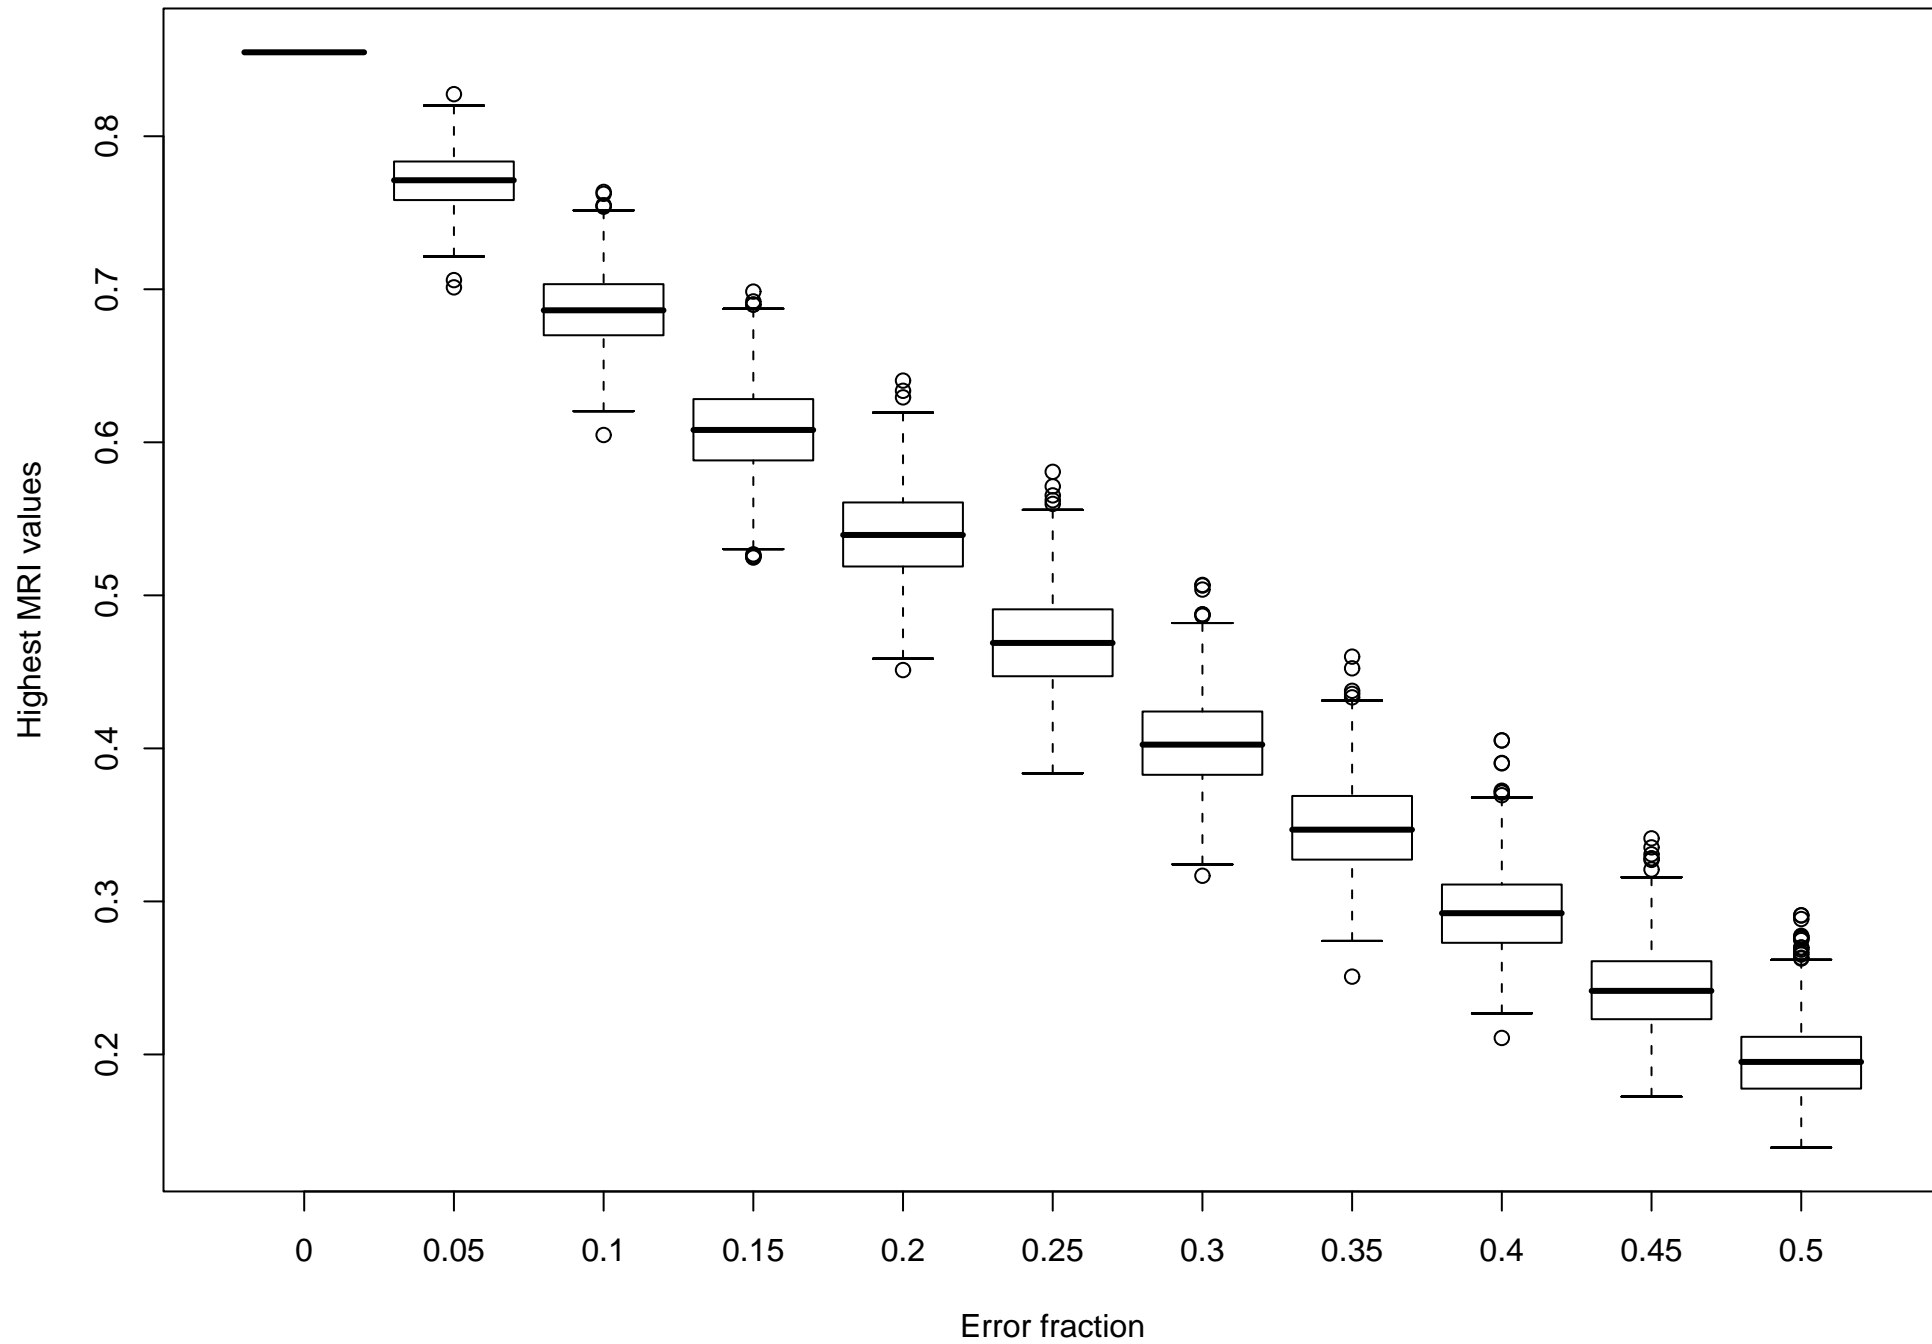

Figure 11

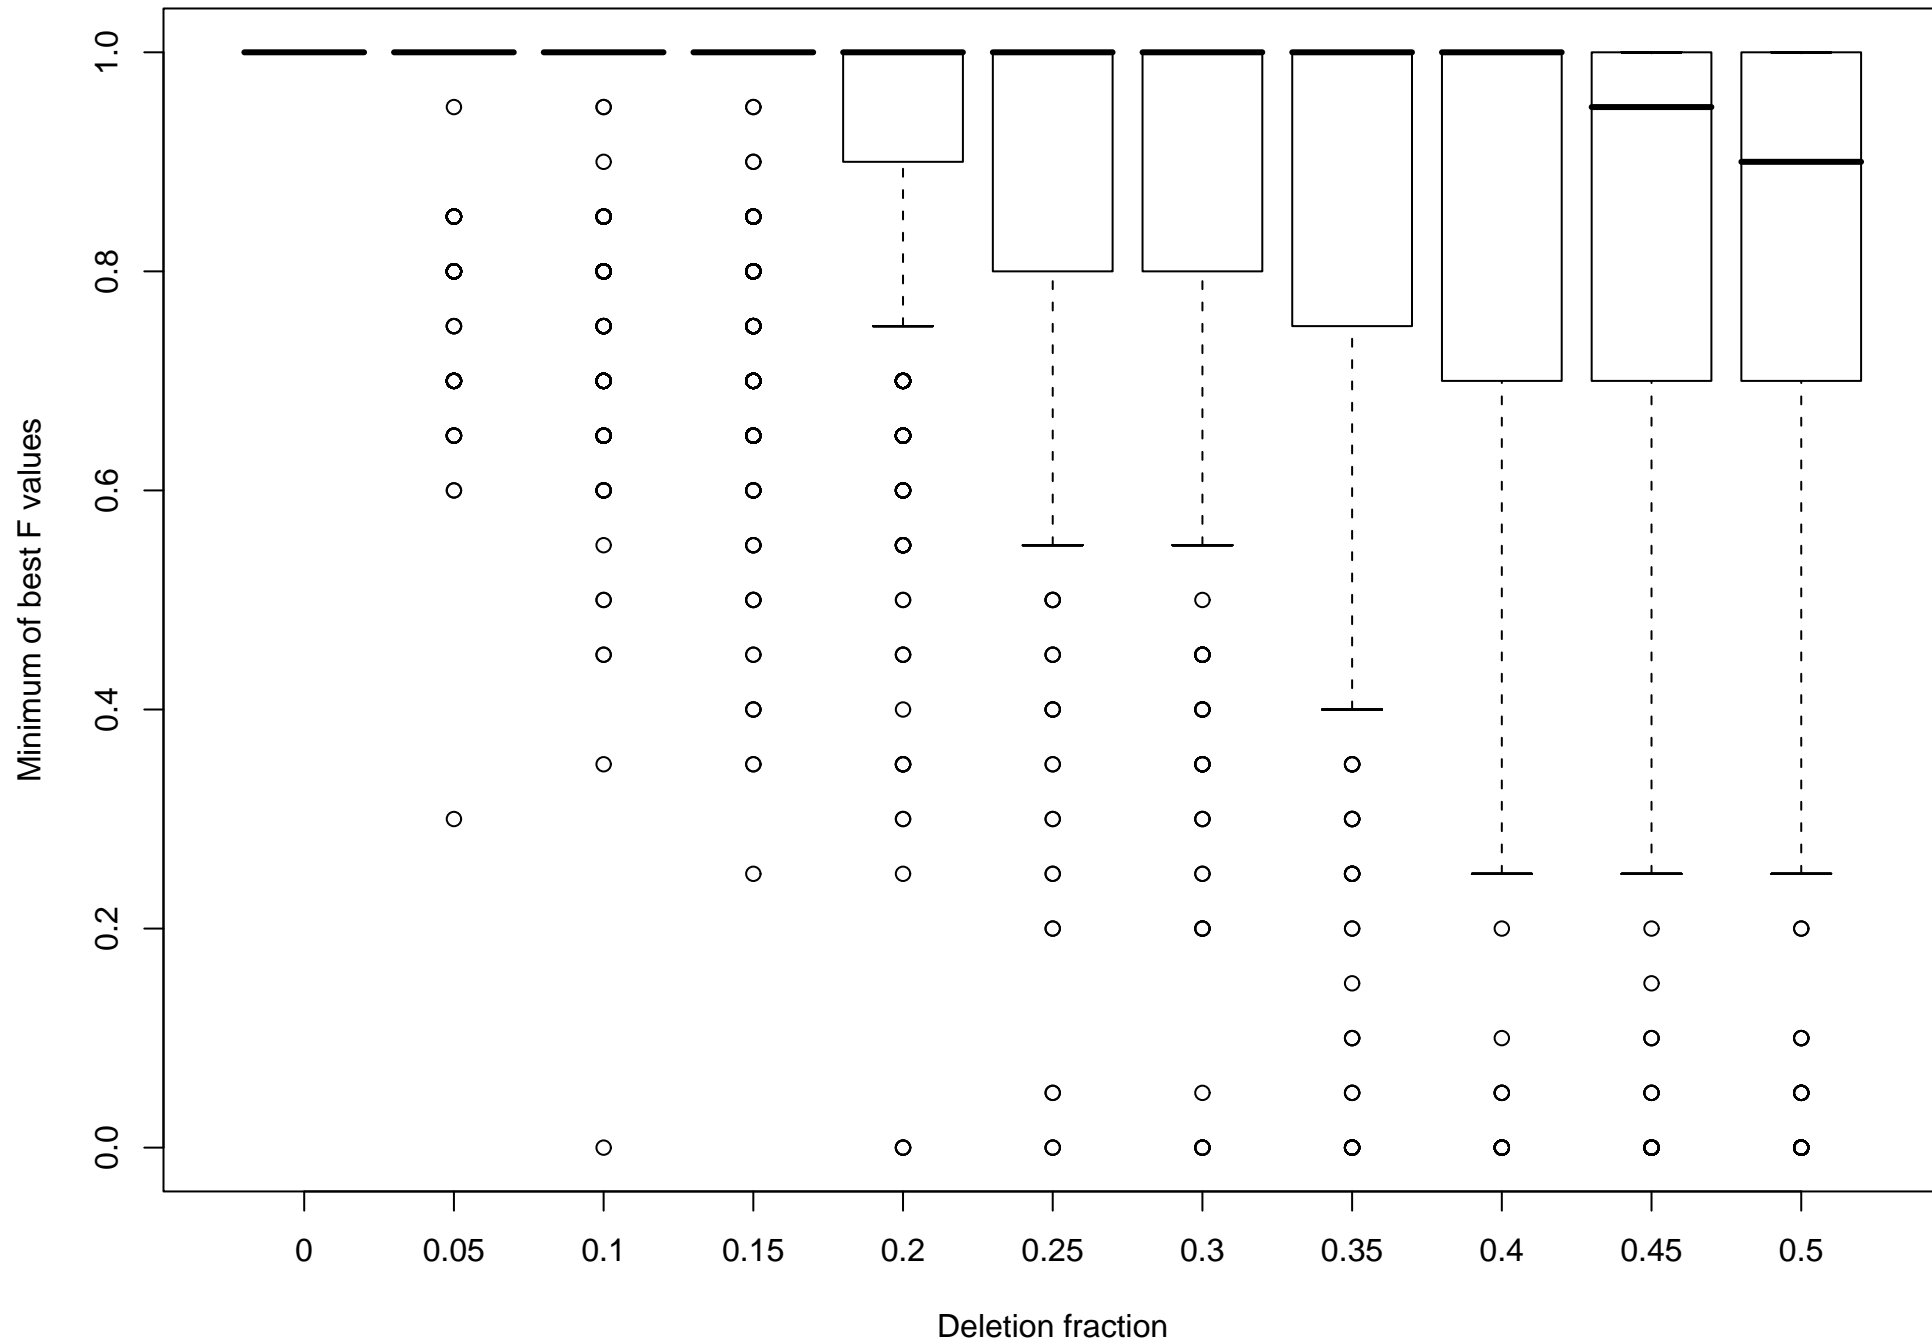

Figure 12

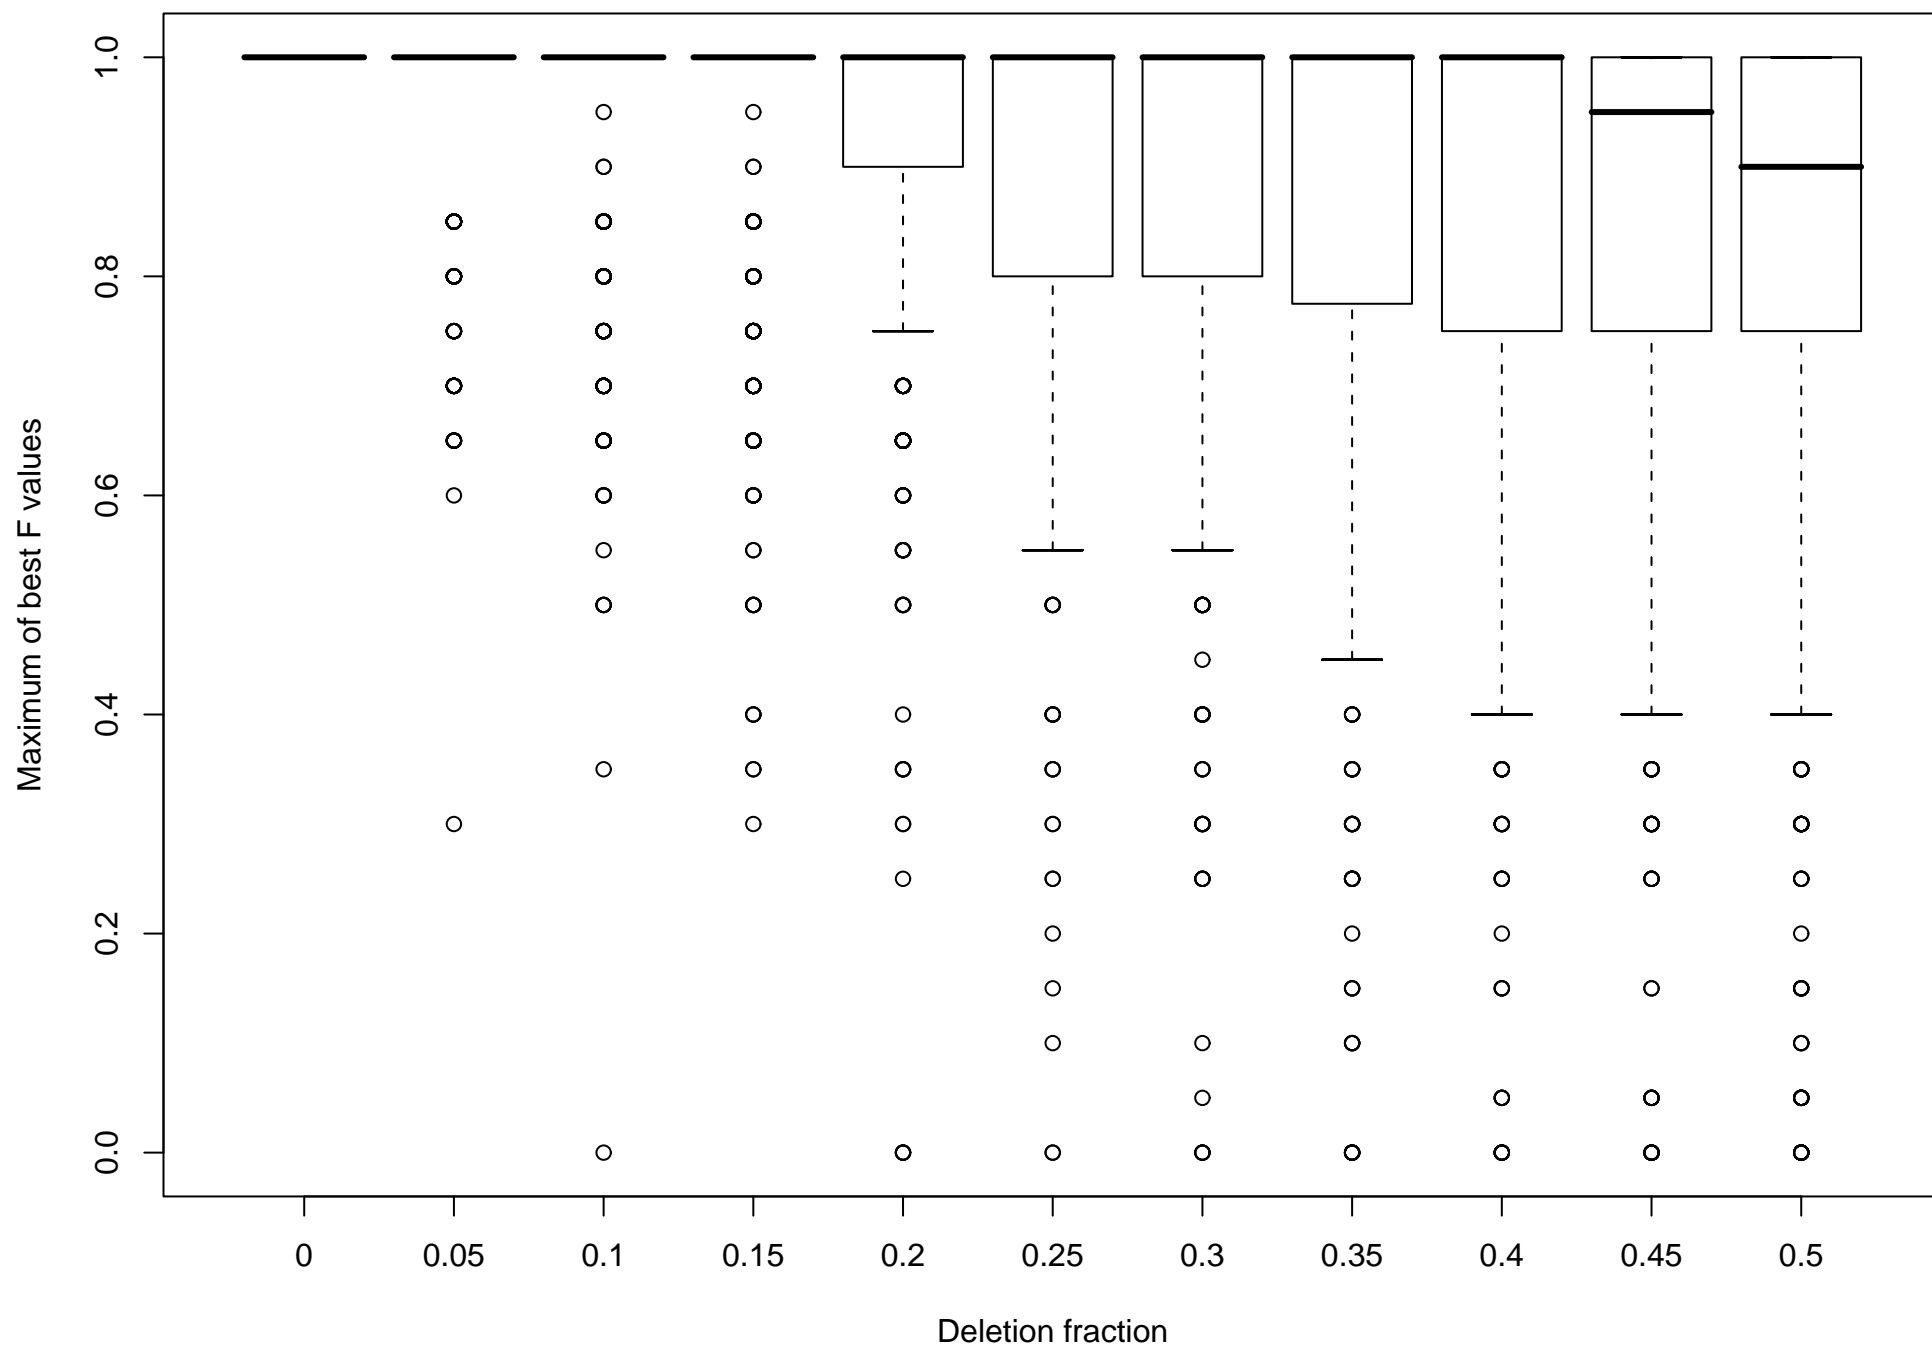

Figure 13

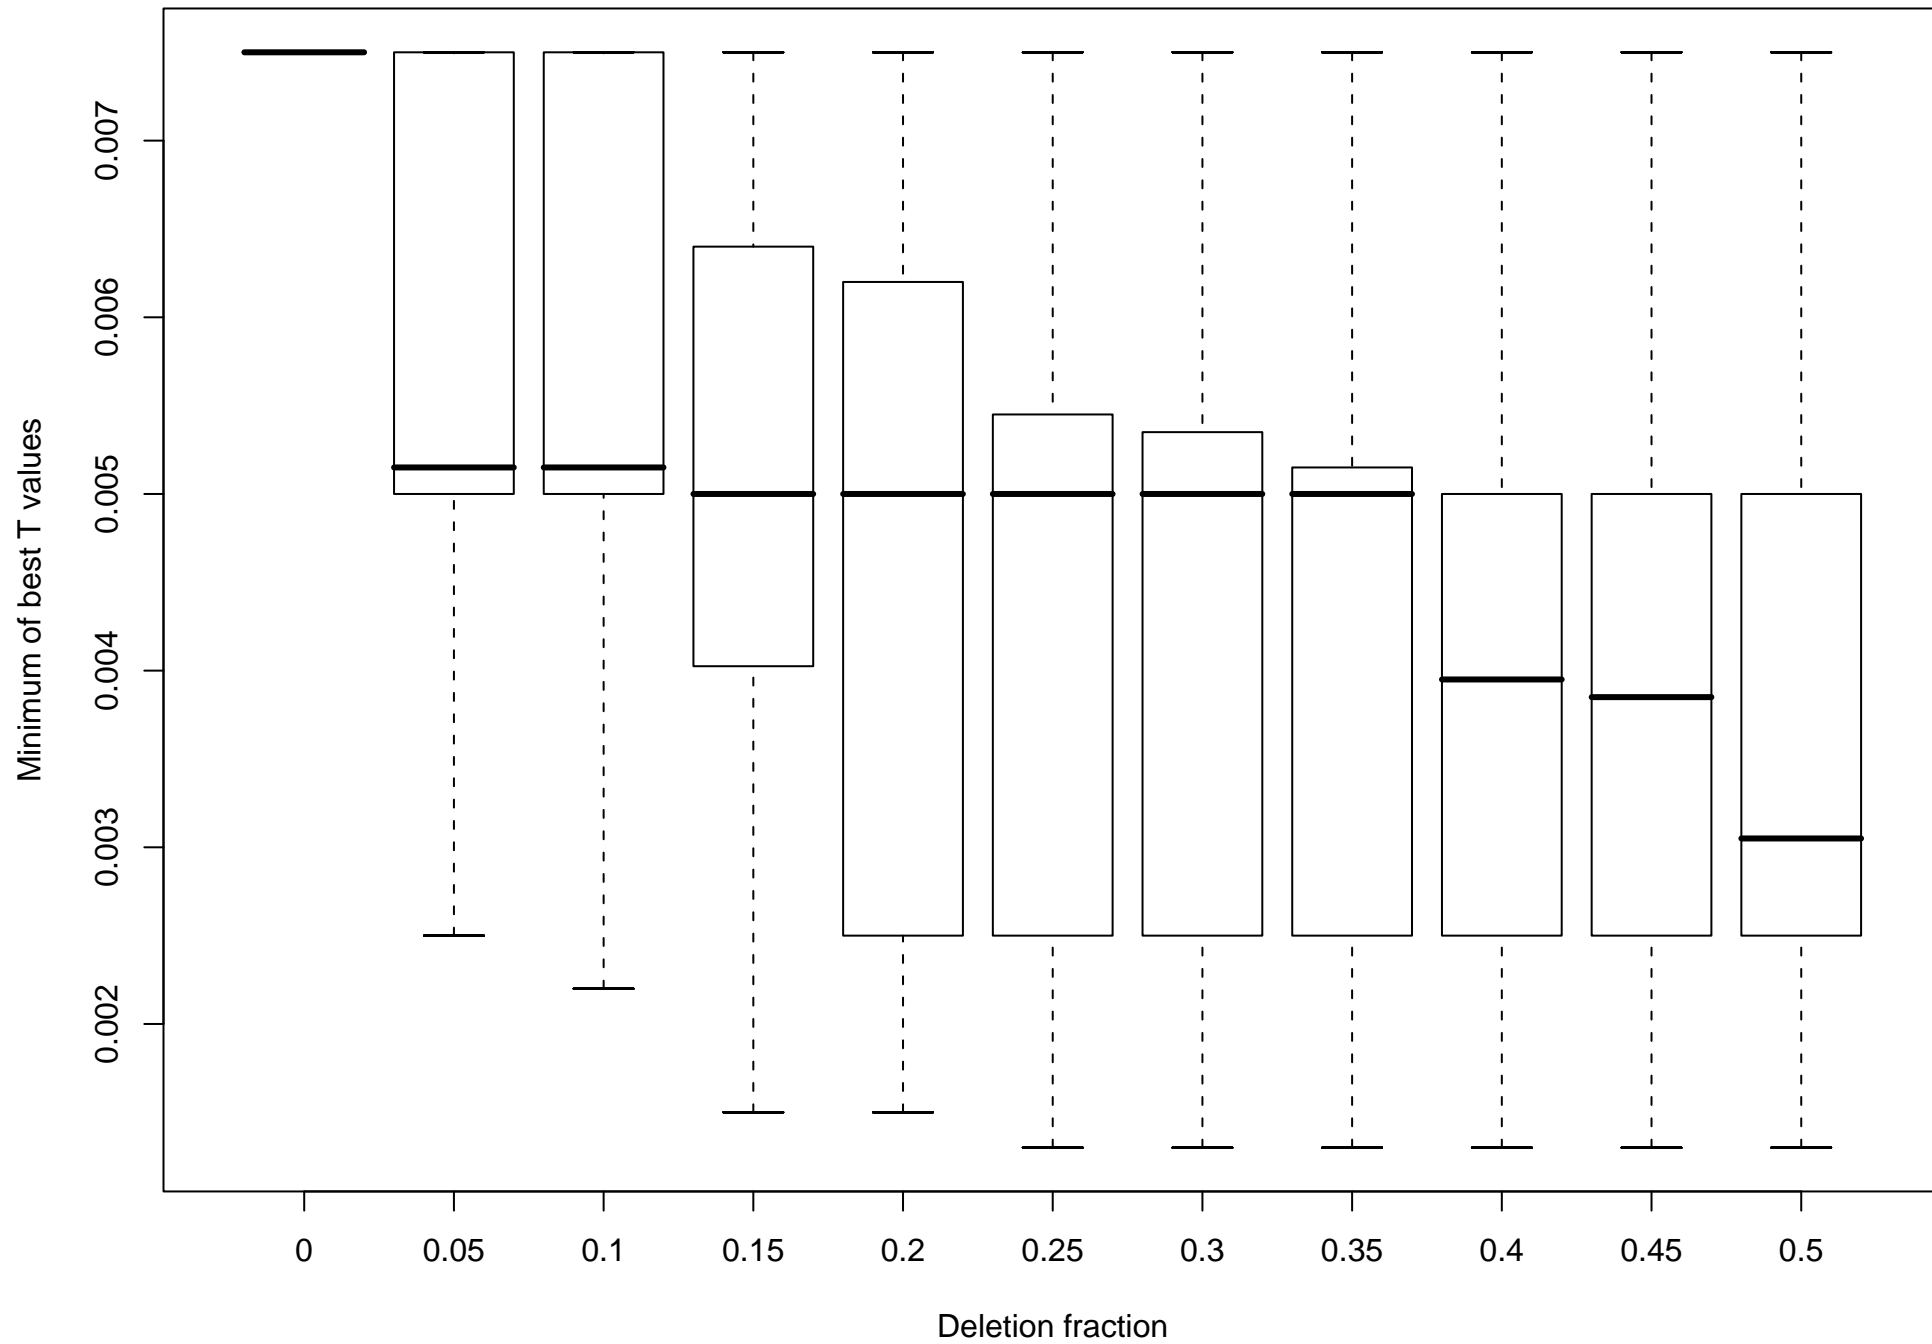

Figure 14

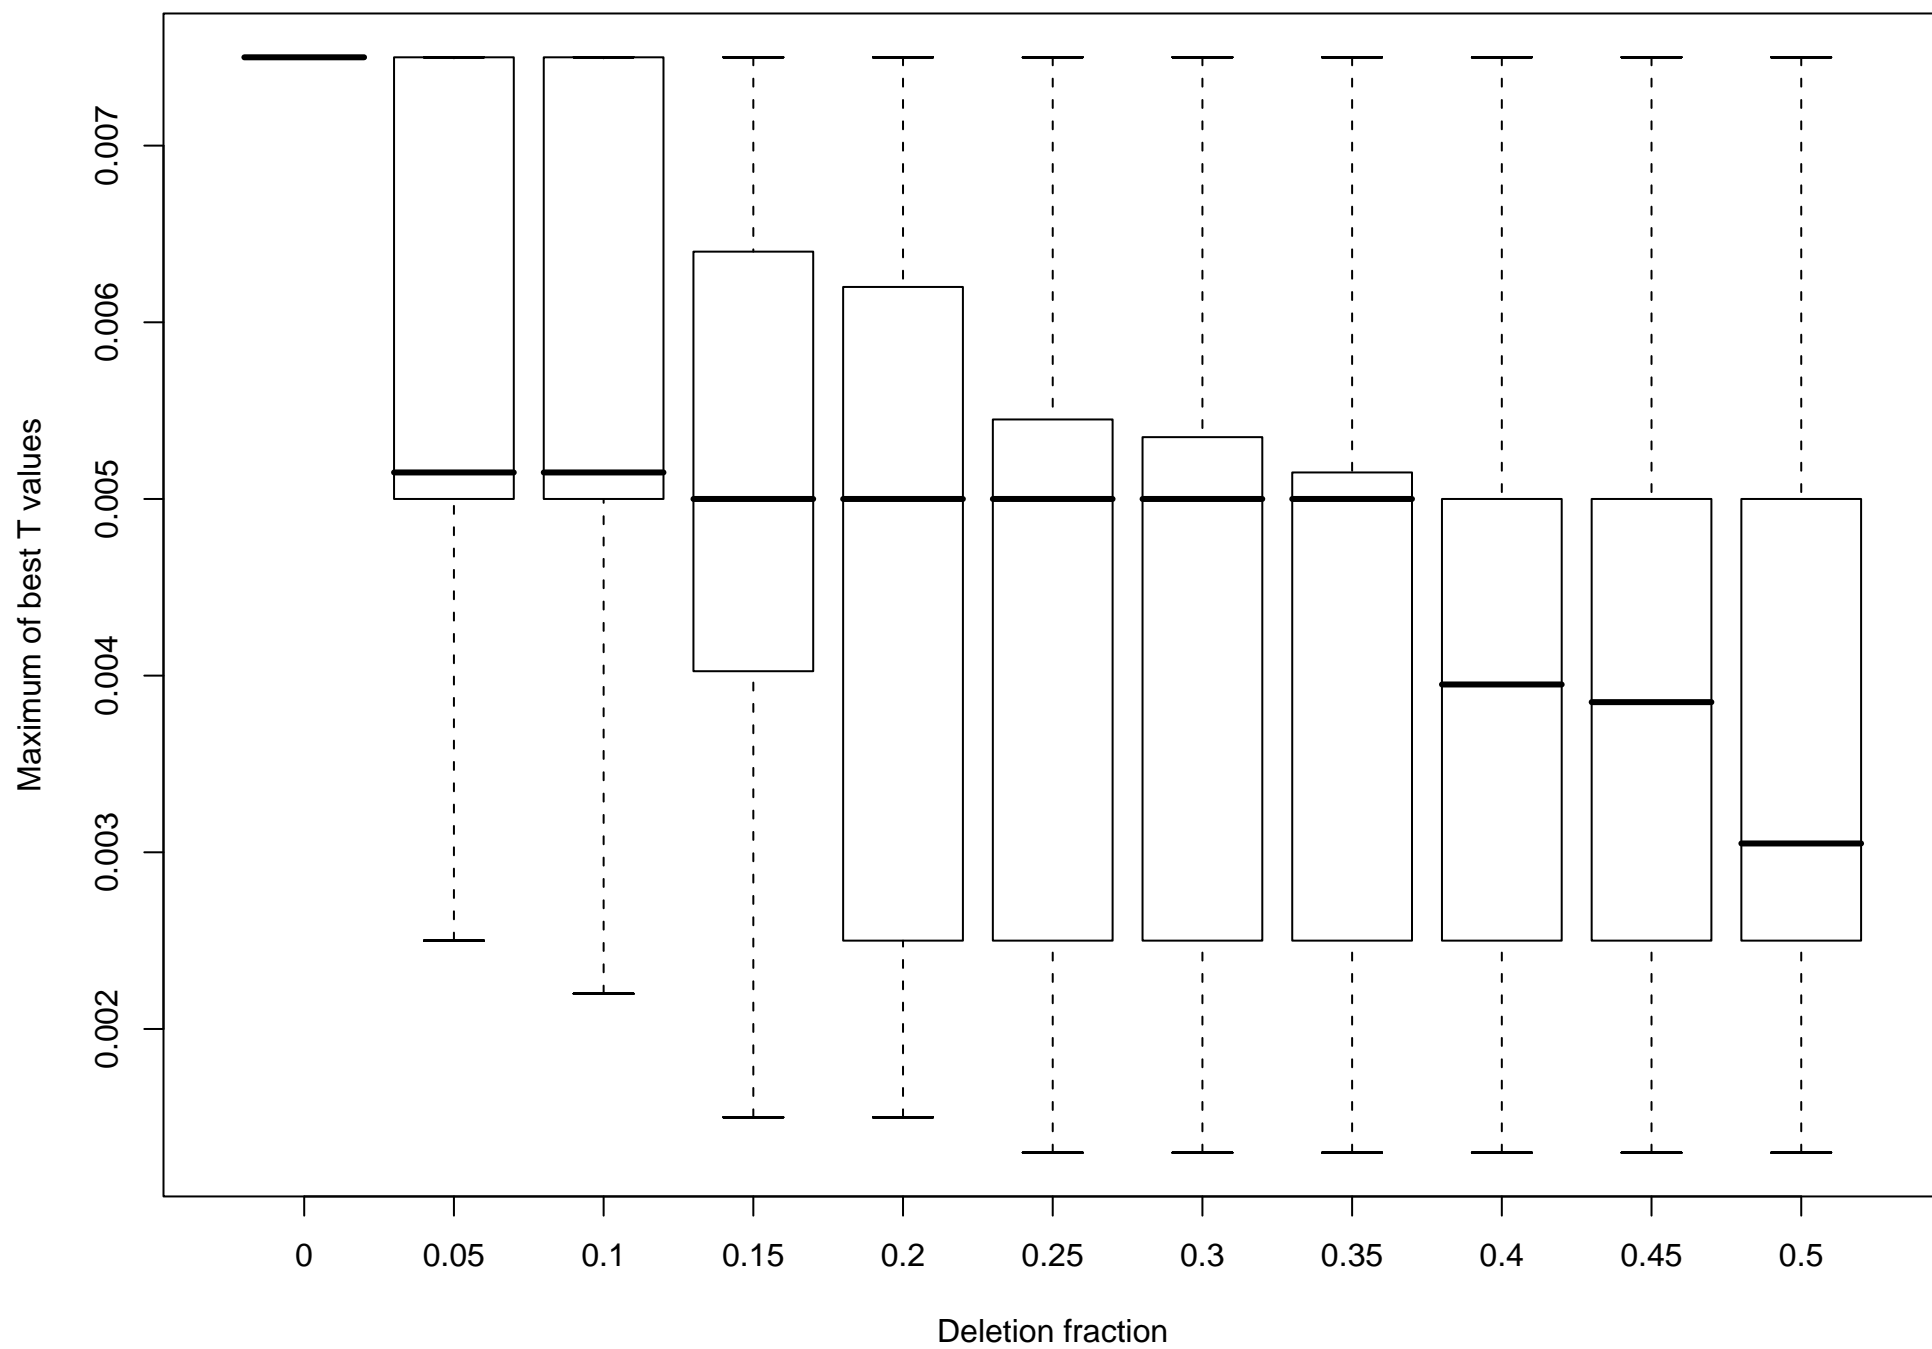

Figure 15

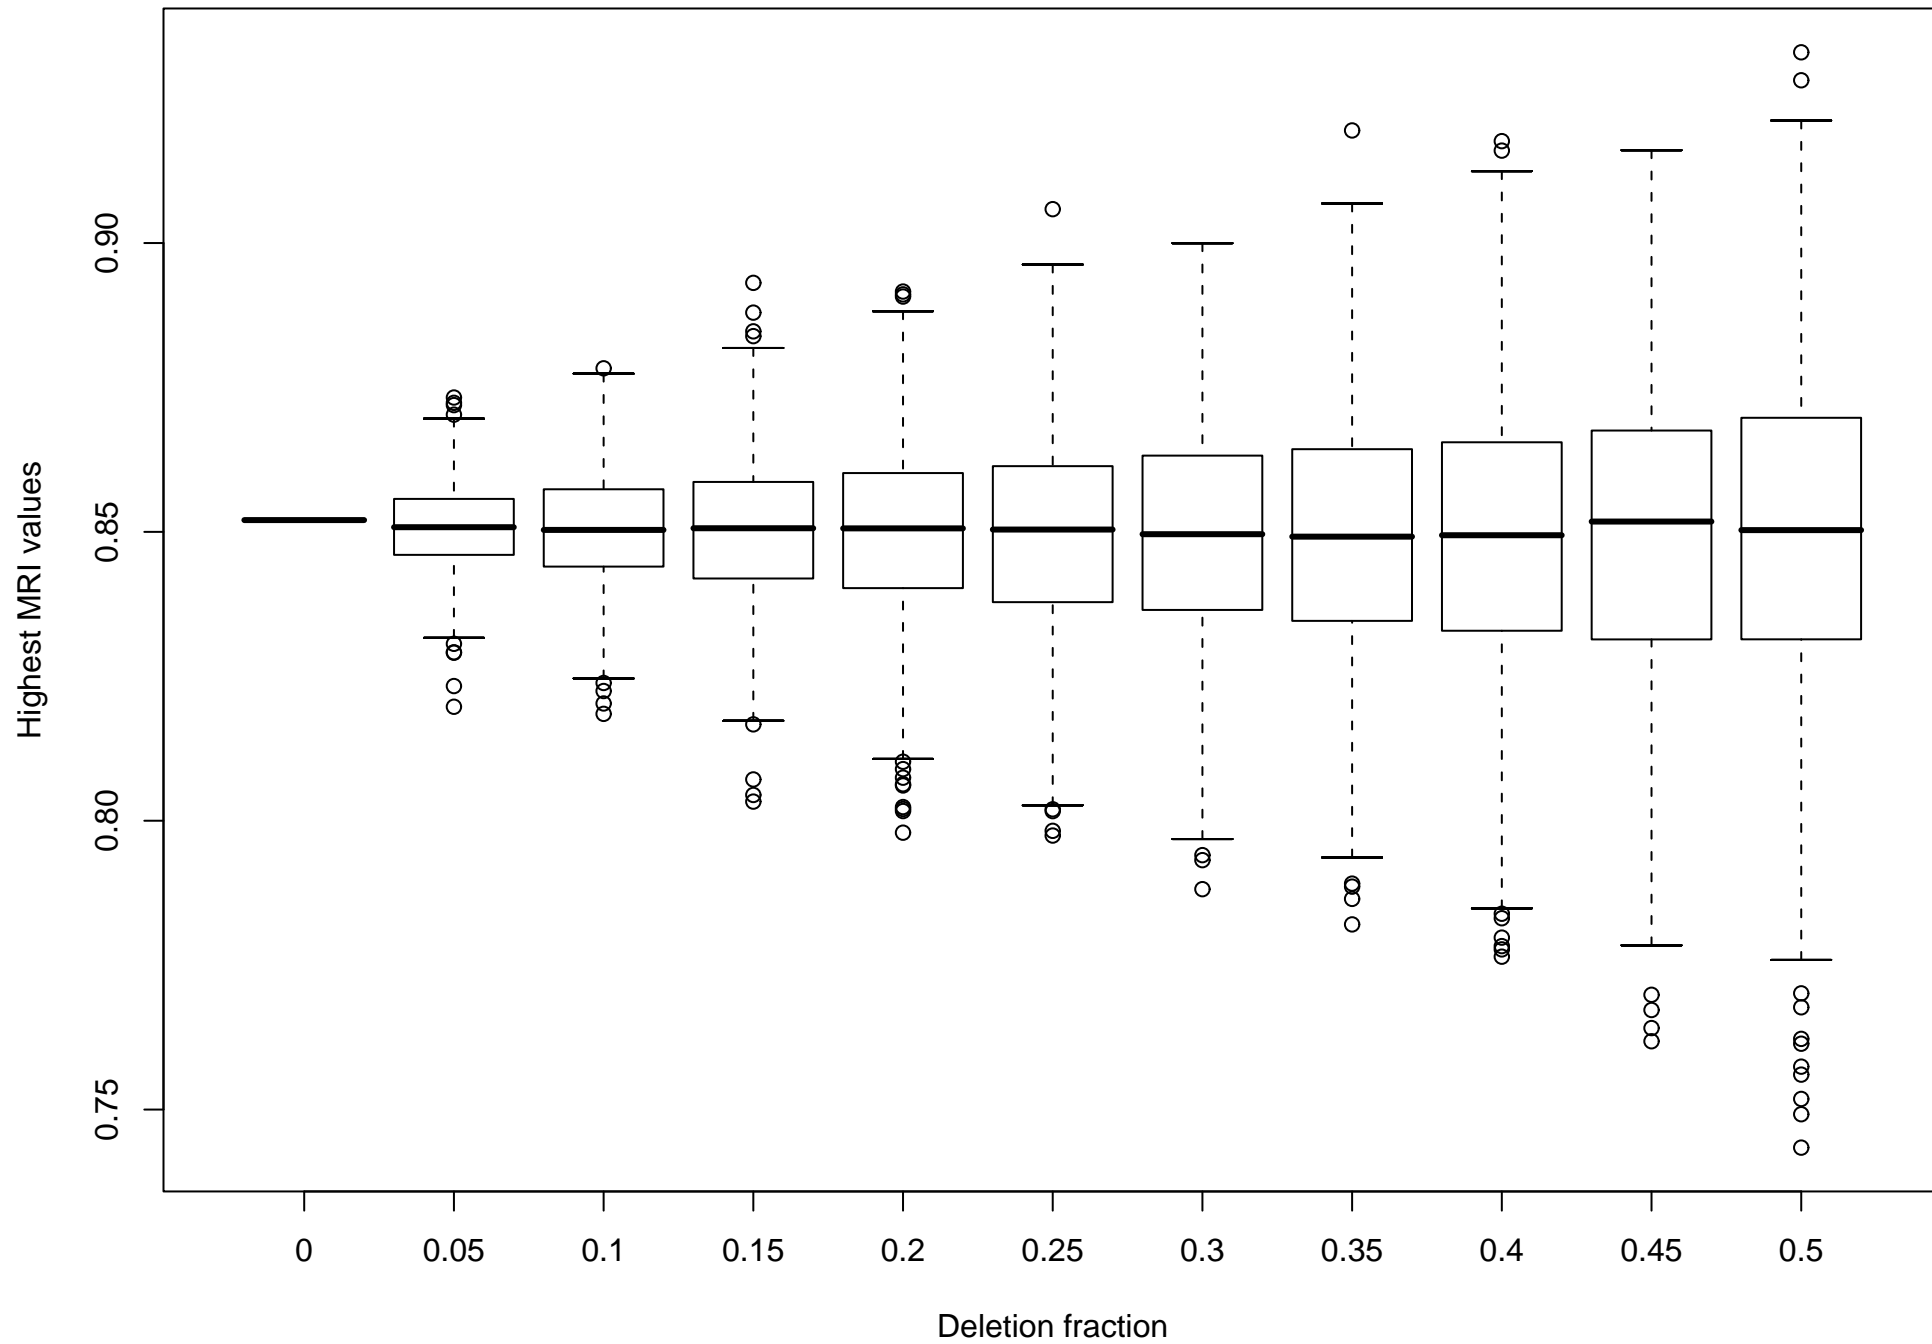

Figure 16

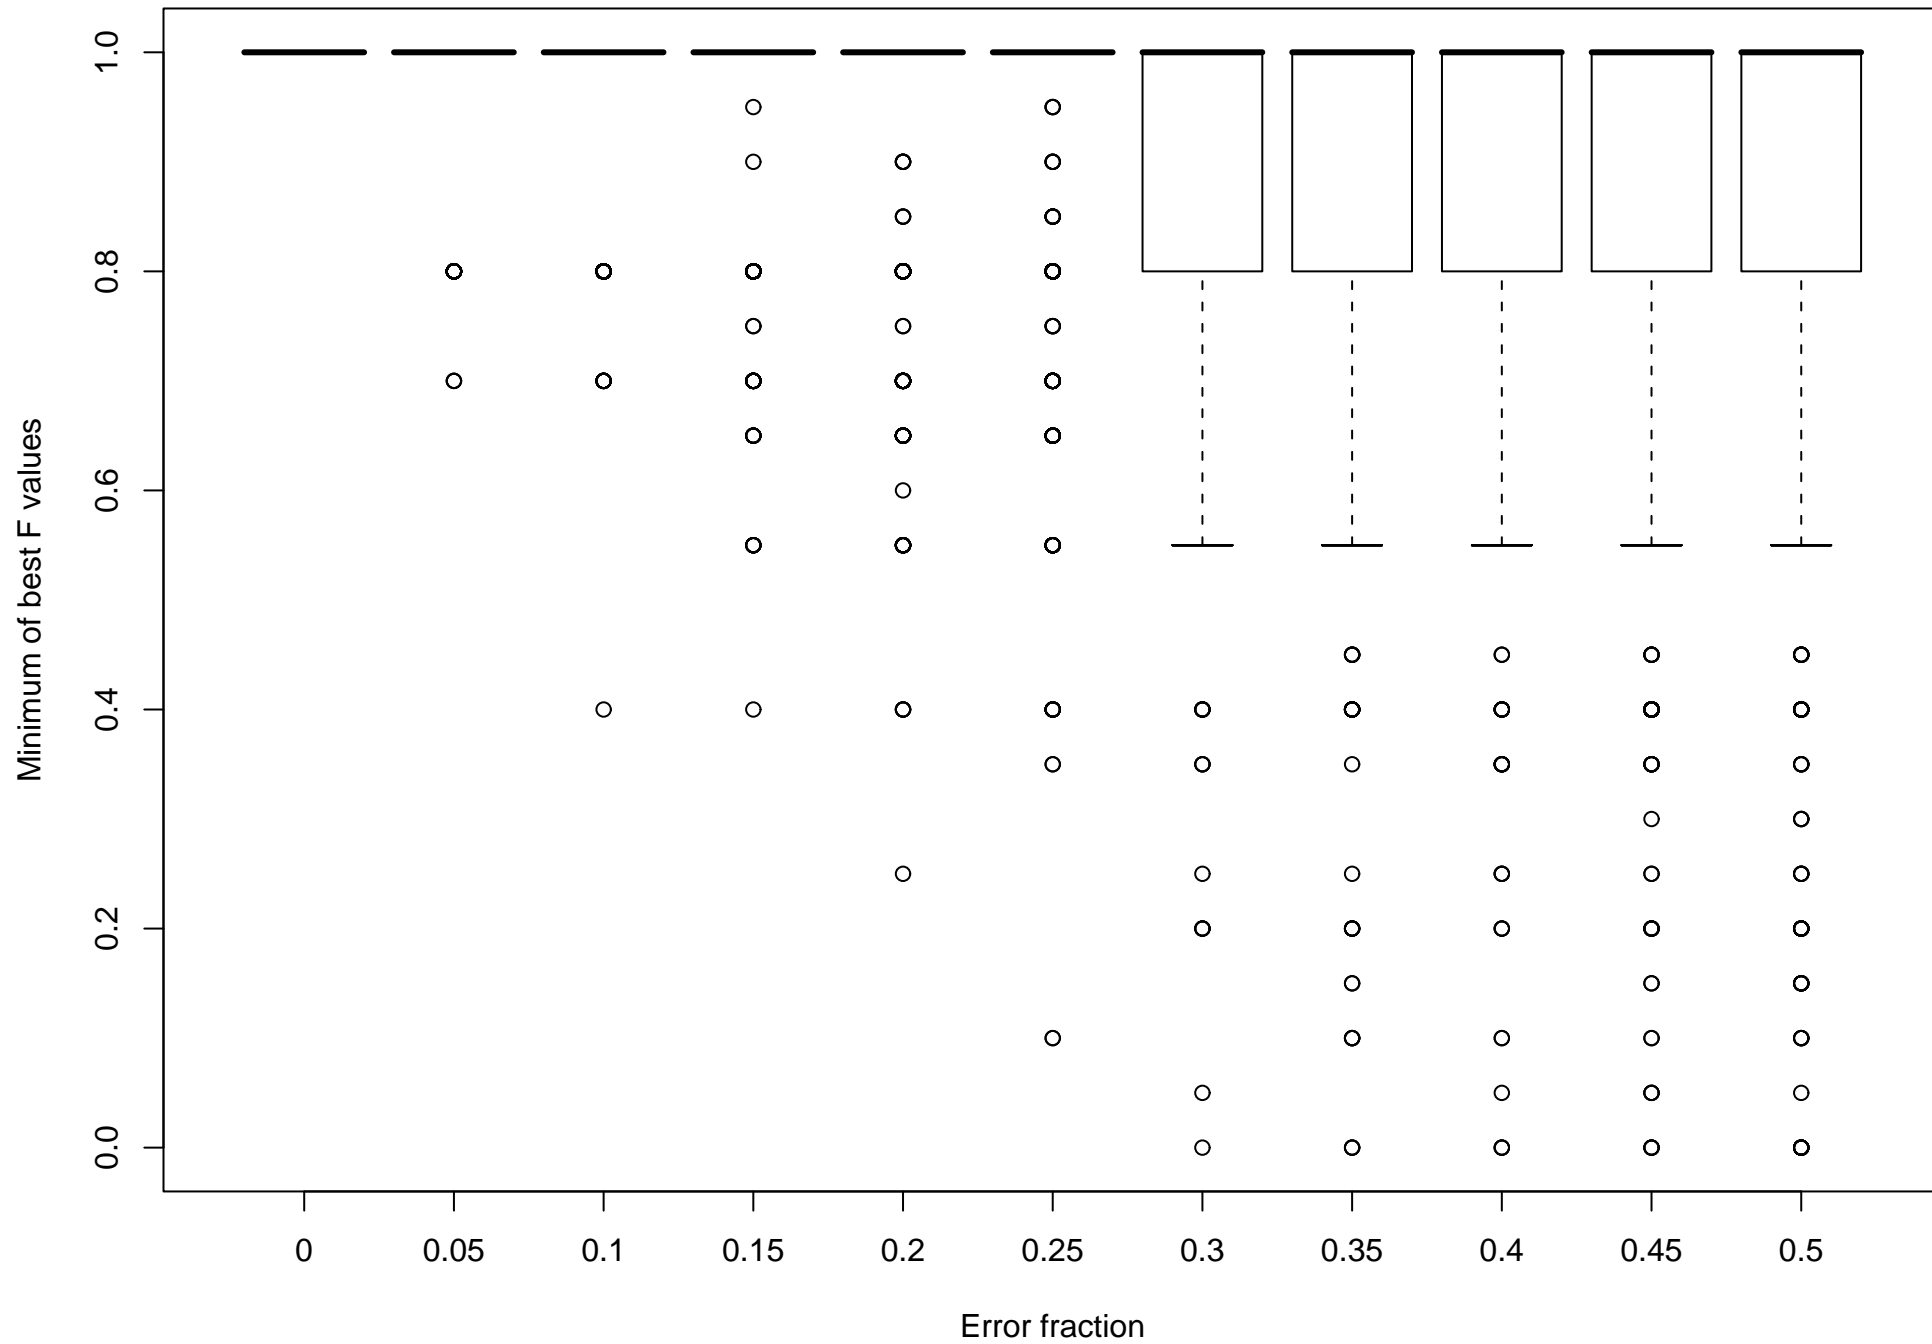

Figure 17

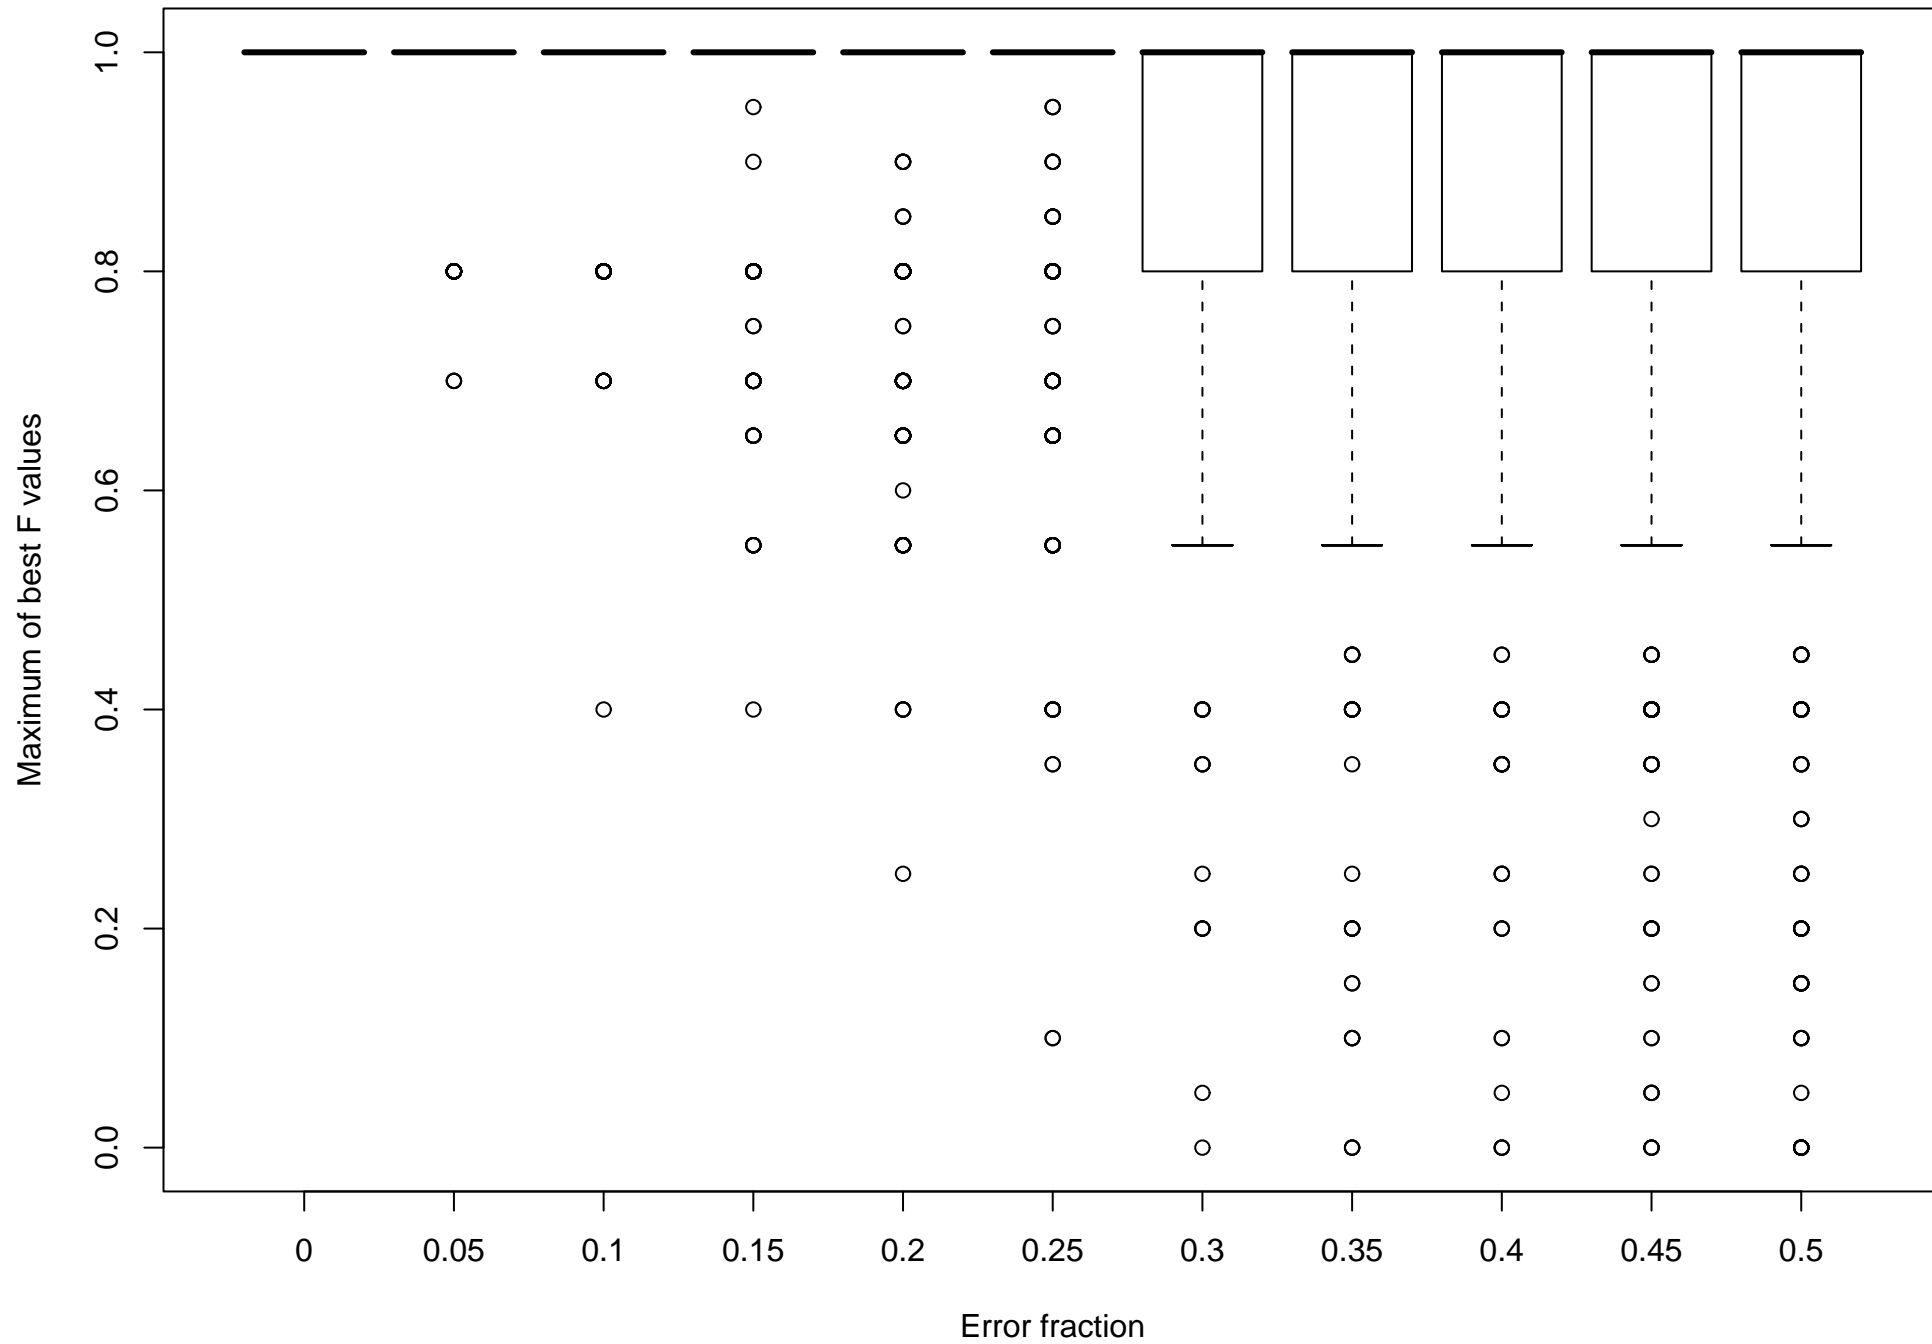

Figure 18

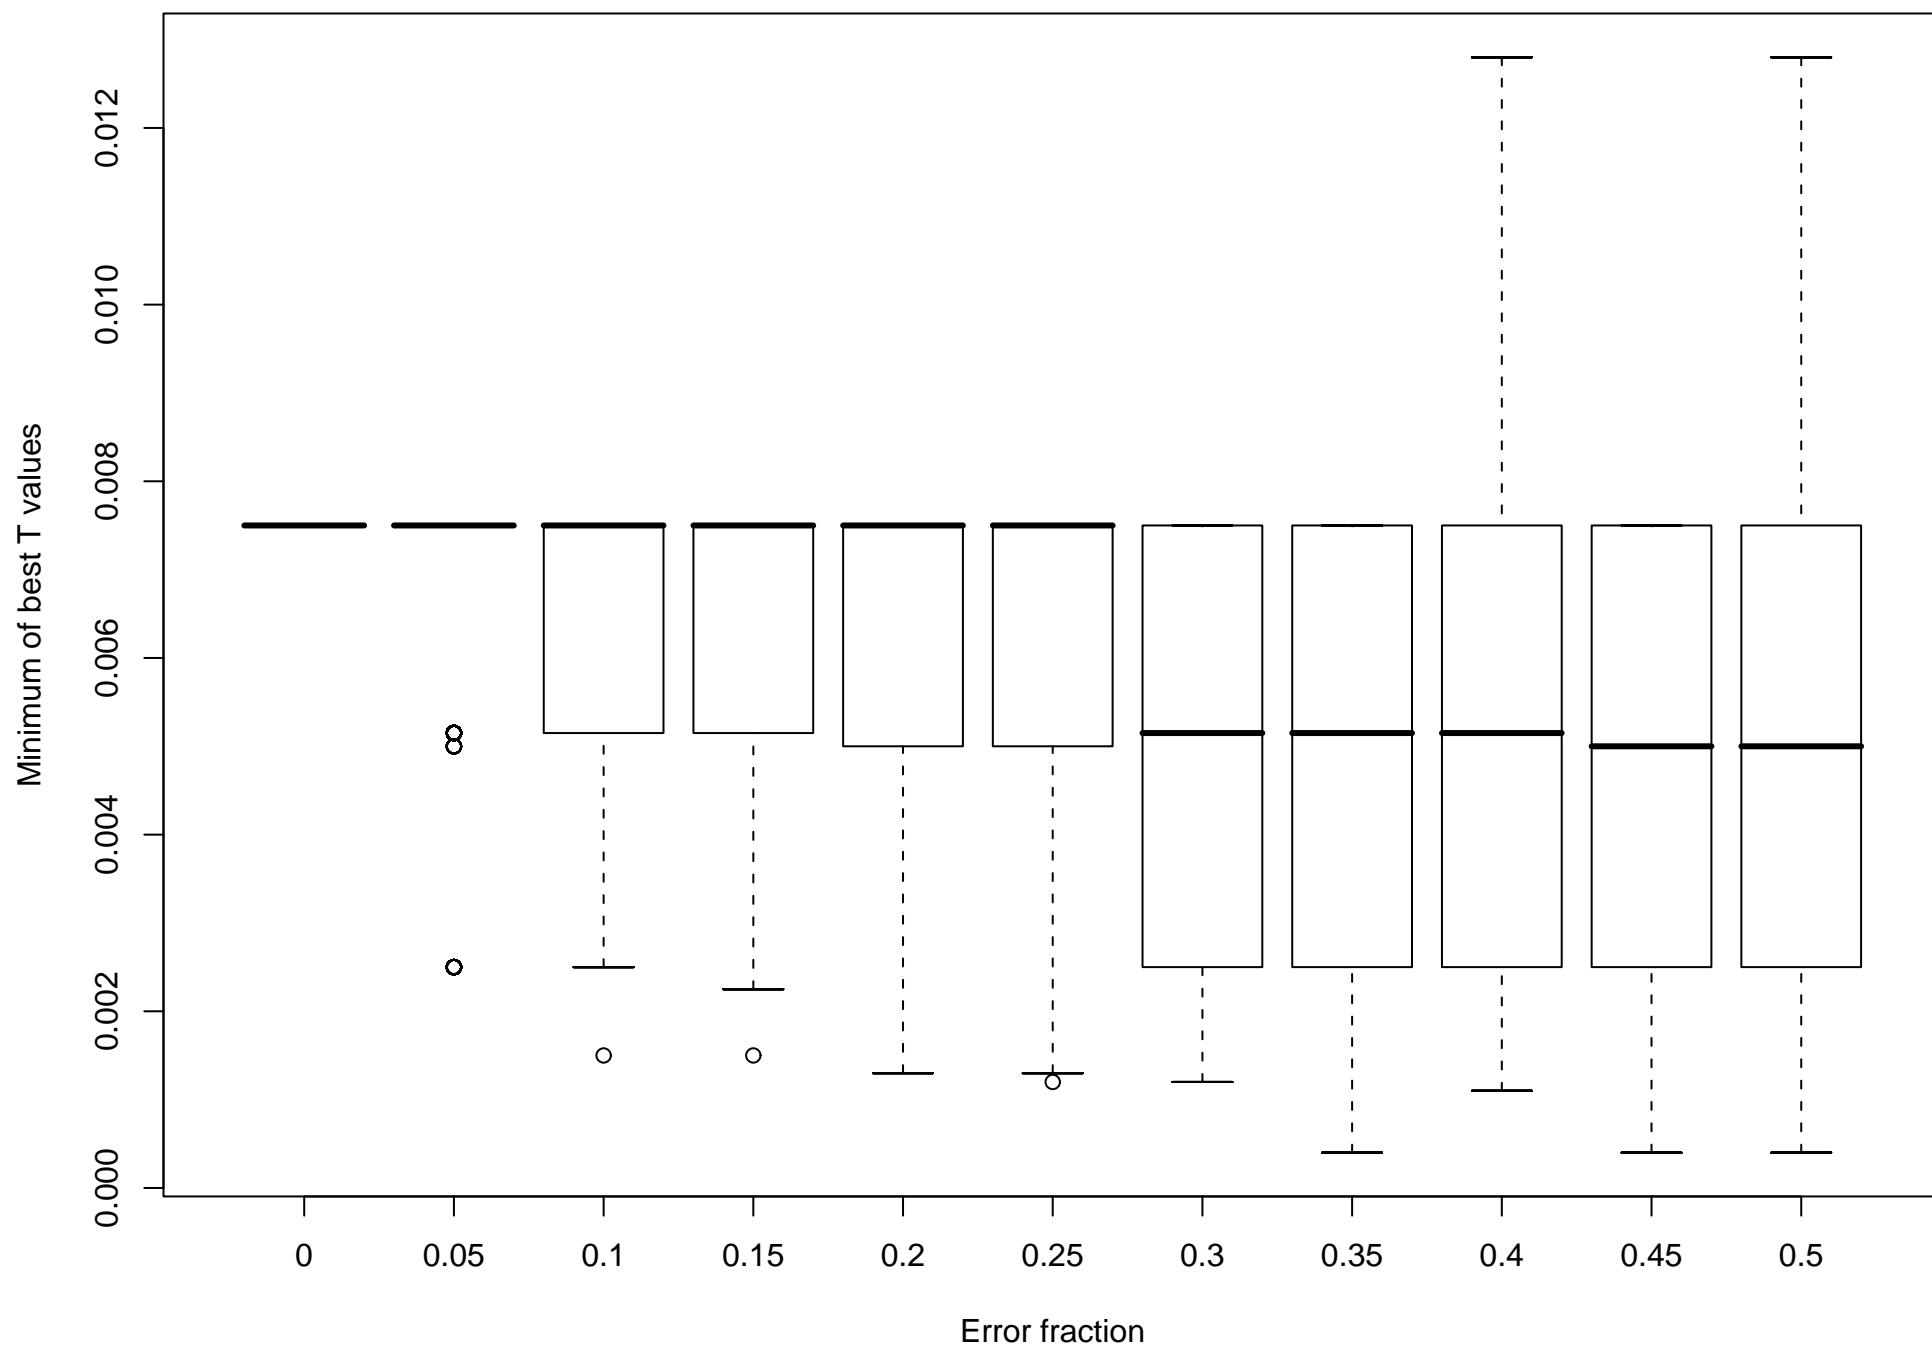

Figure 19

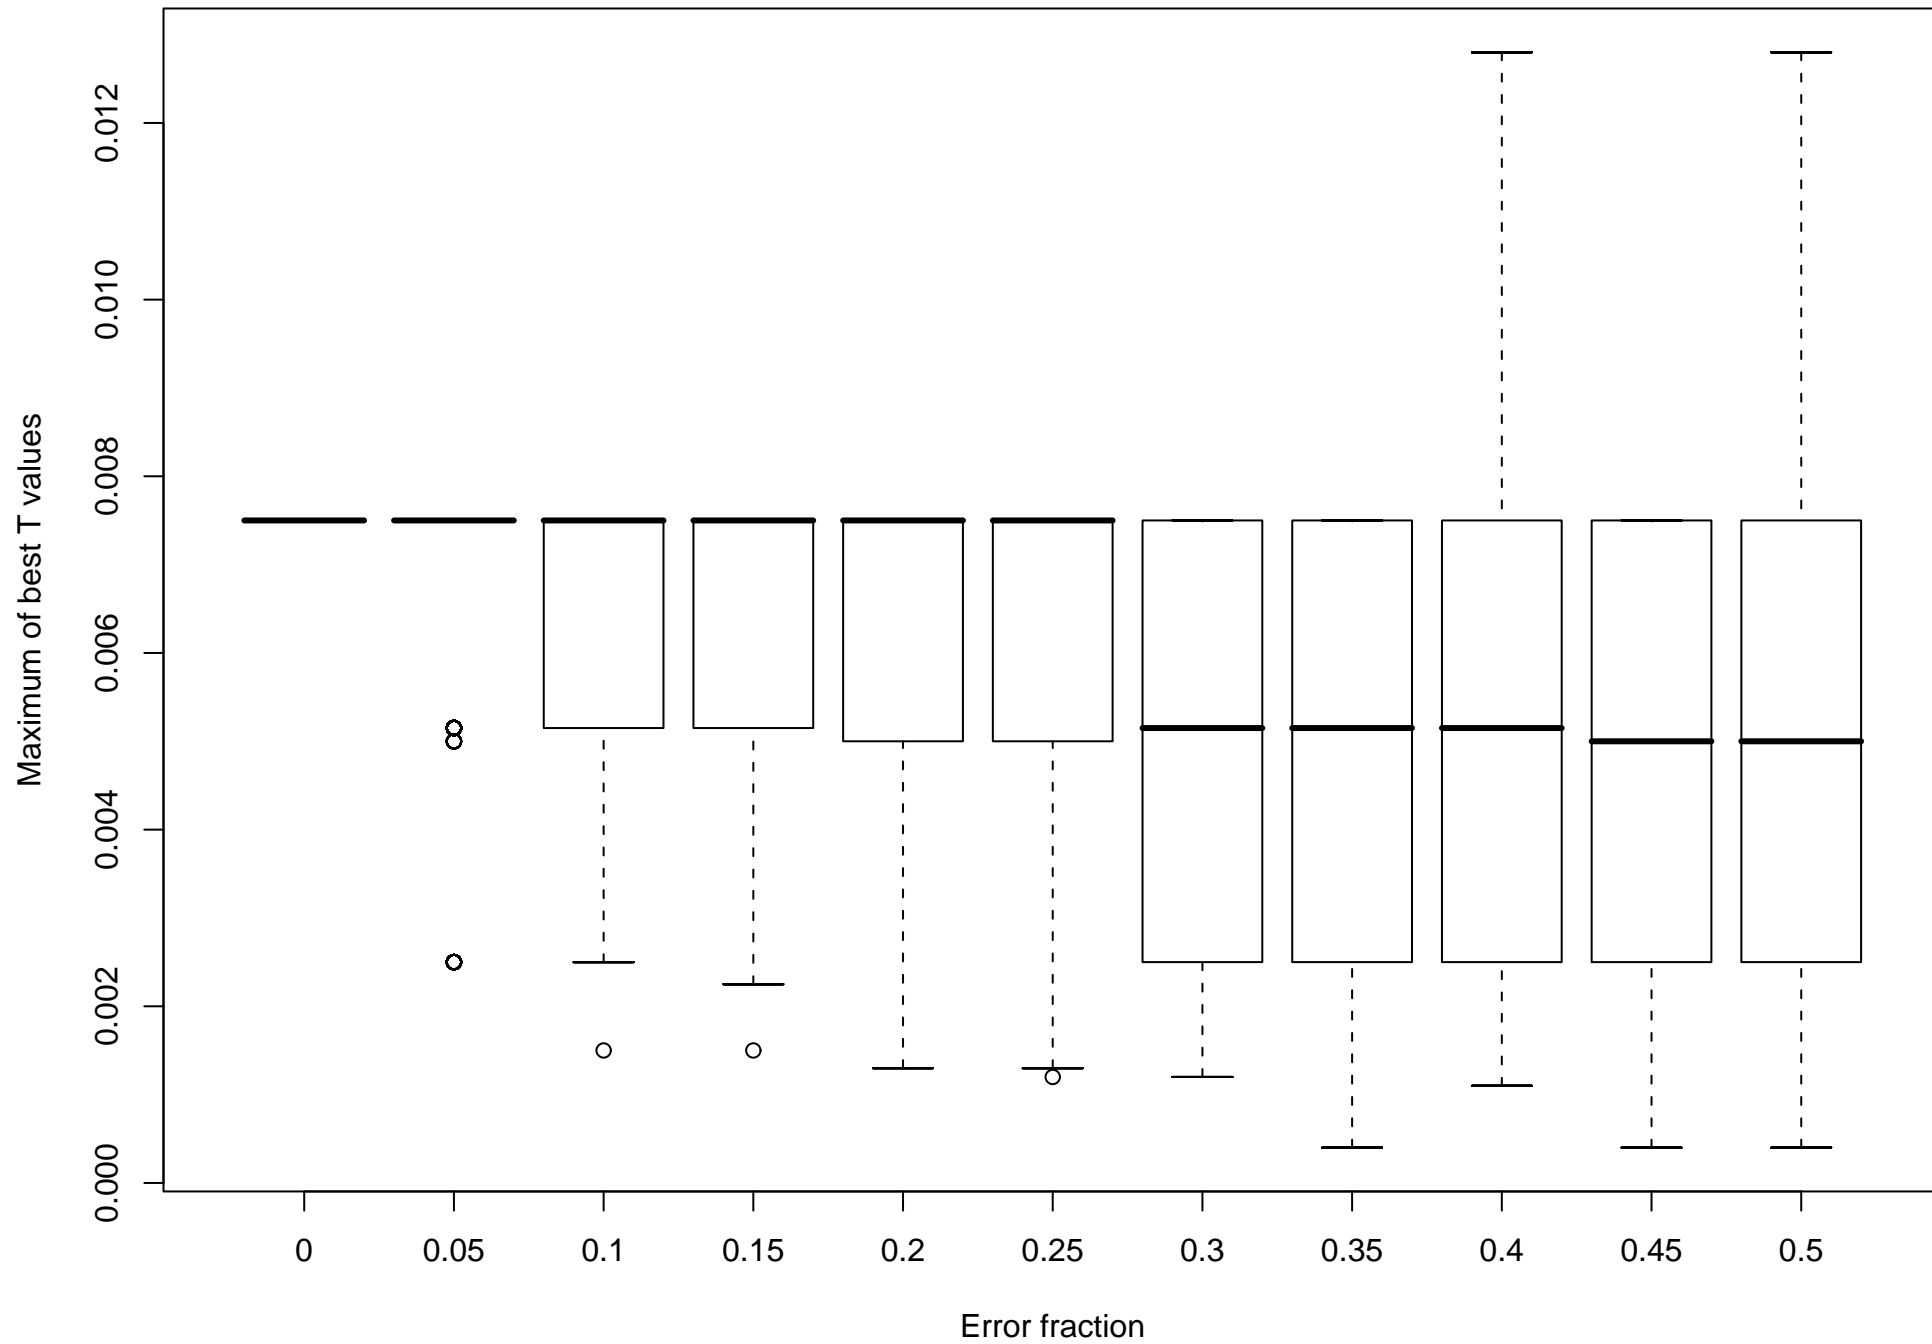

Figure 20

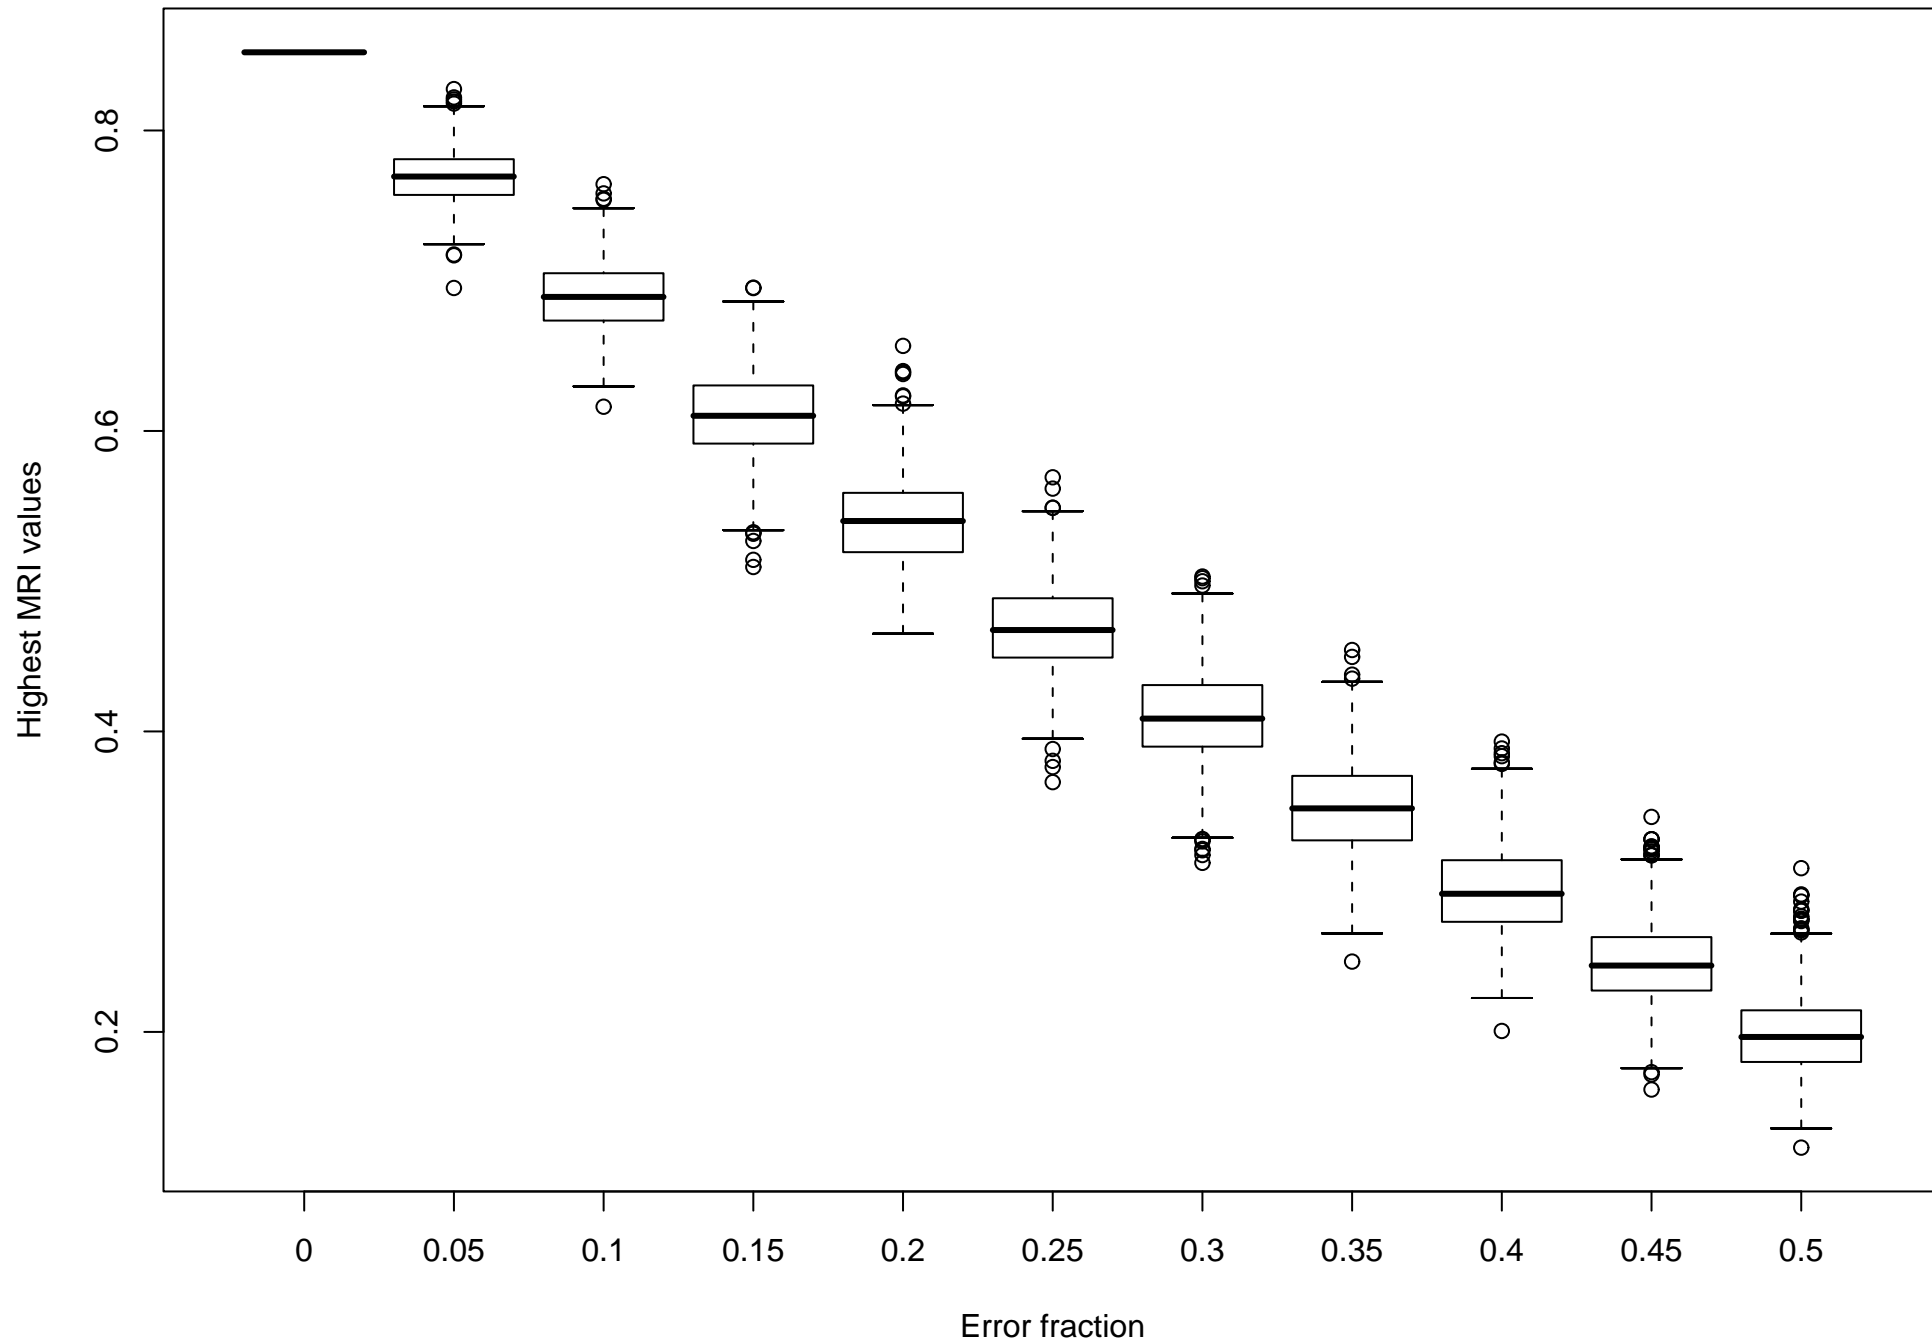

Supplement: File S4 — Contains the illustration of the taxon jackknifing and reference partition random permutation experiments. (0.15 MB PDF) [file pone.0006319.s004.pdf]
