# Supplementary material for: Molecular Taxonomy of Phytopathogenic Fungi: A Case Study in Peronospora
Source: PLoS One. 2009 Jul 29;4(7):e6319. doi: 10.1371/journal.pone.0006319 (PMC2712678; doi:10.1371/journal.pone.0006319)
Supplement: File S2 — Contains the GenBank accession numbers of the sequences under study and all other information extracted from the GenBank files (including the reference partitions), the taxonomy of the host plants, the complete clustering optimization outcome, its taxonomic interpretation and corresponding literature references. (0.25 MB XLS) [file pone.0006319.s002.xls]

## Sheet: Introduction
Supplementary Material to
Markus Göker, Gema García-Blázquez, Hermann Voglmayr, María Teresa Tellería, María Paz Martín
Molecular taxonomy of phytopathogenic fungi: a case study in Peronospora
The tables:
Clustering_Results	Main table with clustering input, results, and interpretation
Host_Taxonomy	The host taxonomy, according to the GenBank/NCBI taxonomy release on 19/01/2008
Query_Sequences	The newly obtained ITS sequences used as examples for queries in molecular taxonomy
References	Literature references for the main table
The columns in the main table with clustering input, results, and interpretation:
Type	Description	Column header
GenBank entries	Accession	ACCESSION
	Taxon ID	TAXON_ID
	Organism	ORGANISM
	Host	HOST
	Authors	AUTHORS
	Journal	JOURNAL
	Date (as extracted from the end of the „LOCUS” line)	DATE
Corrected GenBank information	Corrected organism entry: Reduction to genus and epithet, removal if impossible	VALID_ORGANISM
	Addition of host information from literature sources if possible; minor spelling corrections of GenBank host entries	HOST_CORRECTED
	Whether host information is from GenBank annotation or from original literature	HOST_SOURCE
Sequence information	Sequence length	LENGTH
	Number of ambiguous base calls (anything else then A,C, G or T)	AMBIGUOUS_BASES
Clustering results and their interpretation	Cluster number	CLUSTER
	Formal or informal name assigned to the cluster	ASSIGNED_NAME
	Type of discrepancy between current taxonomy and cluster composition (see below)	DISCREPANCY
Supporting information	Type host or authentic host in the case of Gäumann's species descriptions from several hosts. We mainly follow Constantinescu (1991).	ORIGINAL_HOSTS
	Taxonomically most relevant and/or most recent literature reference	BIBLIOGRAPHY
	Notes regarding nomenclature and other aspects	NOTES
The types of discrepancies between clusters and taxonomy:
I. A given reference taxon is distributed among several clusters (marked in red)
Ia. The taxon occurs on several host species, which correspond to the clusters
Ib. The taxon occurs on a single host species only, but high variability caused by sequencing artefacts is present
Ic. The taxon occurs on a single host species only, but high variability that truly reflects the species’ genetic diversity is present.
II. A given cluster comprises more than one reference taxon (marked in blue)
IIa. The distinct taxa within the cluster occur on the same host species or at least on the same host genus
(IIa). The distinct taxa within the cluster occur on distinct but closely related host genera
IIb. The distinct taxa within the cluster occur on distinct host families
Accessions affected by both type I and type II discrepancies are marked in mauve
The accession marked in green is affected by a database error due to incorrect data submission (concluded from reference publication)

## Sheet: Clustering_Results
ACCESSION	TAXON_ID	ORGANISM	HOST	AUTHORS	JOURNAL	DATE	VALID_ORGANISM	HOST_CORRECTED	HOST_SOURCE	LENGTH	AMBIGUOUS_BASES	CLUSTER	ASSIGNED_NAME	DISCREPANCY	ORIGINAL_HOSTS	BIBLIOGRAPHY	NOTES
EU876602	143453	Pseudoperonospora cubensis	UNKNOWN	Sarris,P.F., Adbelhalim,M., Kitner,M., Skandalis,N.,	Unpublished	2008-08-06	Pseudoperonospora cubensis	UNKNOWN	no reference	801	1	0	parasite of unknown host C0 [Ps. cubensis p.p.]	Ia/Ib/Ic?	Cucurbita pepo	Choi et al. (2005)	~
EU876590	143453	Pseudoperonospora cubensis	UNKNOWN	Sarris,P.F., Adbelhalim,M., Kitner,M., Skandalis,N.,	Unpublished	2008-08-06	Pseudoperonospora cubensis	UNKNOWN	no reference	801	0	1	parasite of unknown host C1 [Ps. cubensis p.p.]	Ia/Ib/Ic?	Cucurbita pepo	Choi et al. (2005)	~
EU876585	143453	Pseudoperonospora cubensis	UNKNOWN	Sarris,P.F., Adbelhalim,M., Kitner,M., Skandalis,N.,	Unpublished	2008-08-06	Pseudoperonospora cubensis	UNKNOWN	no reference	801	0	2	parasite of unknown host C2 [Ps. cubensis p.p.]	Ia/Ib/Ic?	Cucurbita pepo	Choi et al. (2005)	~
DQ643904	162101	Peronospora rumicis	Rumex acetosa	Choi,Y.J., Hong,S.B. and Shin,H.D.	Mycol. Res. 111 (PT 4), 381-391 (2007)	2008-06-19	Peronospora rumicis	Rumex acetosa	from GenBank	799	0	3	Rumex acetosa parasite [Pe. rumicis p.p.]	Ib/Ic?	Rumex acetosella	id.	~
DQ643841	134698	Peronospora farinosa	Atriplex littoralis	Choi,Y.J., Hong,S.B. and Shin,H.D.	Mycol. Res. 111 (PT 4), 381-391 (2007)	2008-06-19	Peronospora farinosa	Atriplex littoralis	from GenBank	798	0	4	Pe. litoralis	Ia	+ Atriplex hastata	Gustavsson (1959): 34, Gäumann (1923): 224	The older name Peronospora farinosa has been described from Atriplex sp., but without further details and without known extant type specimen, and should therefore currently be considered a nomen dubium.
DQ643842	134698	Peronospora farinosa	Atriplex patula	Choi,Y.J., Hong,S.B. and Shin,H.D.	Mycol. Res. 111 (PT 4), 381-391 (2007)	2008-06-19	Peronospora farinosa	Atriplex patula	from GenBank	800	0	5	Pe. minor	Ia	id.	Gustavsson (1959): 32, Gäumann (1923): 225	The older name Peronospora farinosa has been described from Atriplex sp., but without further details and without known extant type specimen, and should therefore currently be considered a nomen dubium.
DQ643840	134698	Peronospora farinosa	Atriplex sp.	Choi,Y.J., Hong,S.B. and Shin,H.D.	Mycol. Res. 111 (PT 4), 381-391 (2007)	2008-06-19	Peronospora farinosa	Atriplex sp.	from GenBank	800	0	5	Pe. minor	Ia	Atriplex patula	Gustavsson (1959): 32, Gäumann (1923): 226	The older name Peronospora farinosa has been described from Atriplex sp., but without further details and without known extant type specimen, and should therefore currently be considered a nomen dubium.
DQ643874	542832	Peronospora effusa	Spinacia oleracea	Choi,Y.J., Hong,S.B. and Shin,H.D.	Mycol. Res. 111 (PT 4), 381-391 (2007)	2008-06-19	Peronospora effusa	Spinacia oleracea	from GenBank	798	0	6	Pe. effusa	None, GenBank annotation error: see cluster 70	id.	id.	~
DQ643880	542832	Peronospora effusa	Spinacia oleracea	Choi,Y.J., Hong,S.B. and Shin,H.D.	Mycol. Res. 111 (PT 4), 381-391 (2007)	2008-06-19	Peronospora effusa	Spinacia oleracea	from GenBank	798	0	6	Pe. effusa	None, GenBank annotation error: see cluster 70	id.	id.	~
DQ643857	542832	Peronospora effusa	Spinacia oleracea	Choi,Y.J., Hong,S.B. and Shin,H.D.	Mycol. Res. 111 (PT 4), 381-391 (2007)	2008-06-19	Peronospora effusa	Spinacia oleracea	from GenBank	798	0	6	Pe. effusa	None, GenBank annotation error: see cluster 70	id.	id.	~
DQ643876	542832	Peronospora effusa	Spinacia oleracea	Choi,Y.J., Hong,S.B. and Shin,H.D.	Mycol. Res. 111 (PT 4), 381-391 (2007)	2008-06-19	Peronospora effusa	Spinacia oleracea	from GenBank	798	0	6	Pe. effusa	None, GenBank annotation error: see cluster 70	id.	id.	~
DQ643875	542832	Peronospora effusa	Spinacia oleracea	Choi,Y.J., Hong,S.B. and Shin,H.D.	Mycol. Res. 111 (PT 4), 381-391 (2007)	2008-06-19	Peronospora effusa	Spinacia oleracea	from GenBank	798	0	6	Pe. effusa	None, GenBank annotation error: see cluster 70	id.	id.	~
AF528559	542832	Peronospora effusa	Spinacia oleracea	Choi,Y.J., Hong,S.B. and Shin,H.D.	Unpublished	2008-06-18	Peronospora effusa	Spinacia oleracea	from GenBank	1201	0	6	Pe. effusa	None, GenBank annotation error: see cluster 70	id.	Choi et al. (2007)	~
DQ643868	542832	Peronospora effusa	Spinacia oleracea	Choi,Y.J., Hong,S.B. and Shin,H.D.	Mycol. Res. 111 (PT 4), 381-391 (2007)	2008-06-19	Peronospora effusa	Spinacia oleracea	from GenBank	798	0	6	Pe. effusa	None, GenBank annotation error: see cluster 70	id.	id.	~
DQ643867	542832	Peronospora effusa	Spinacia oleracea	Choi,Y.J., Hong,S.B. and Shin,H.D.	Mycol. Res. 111 (PT 4), 381-391 (2007)	2008-06-19	Peronospora effusa	Spinacia oleracea	from GenBank	798	0	6	Pe. effusa	None, GenBank annotation error: see cluster 70	id.	id.	~
DQ643866	542832	Peronospora effusa	Spinacia oleracea	Choi,Y.J., Hong,S.B. and Shin,H.D.	Mycol. Res. 111 (PT 4), 381-391 (2007)	2008-06-19	Peronospora effusa	Spinacia oleracea	from GenBank	798	0	6	Pe. effusa	None, GenBank annotation error: see cluster 70	id.	id.	~
DQ643864	542832	Peronospora effusa	Spinacia oleracea	Choi,Y.J., Hong,S.B. and Shin,H.D.	Mycol. Res. 111 (PT 4), 381-391 (2007)	2008-06-19	Peronospora effusa	Spinacia oleracea	from GenBank	798	0	6	Pe. effusa	None, GenBank annotation error: see cluster 70	id.	id.	~
DQ643872	542832	Peronospora effusa	Spinacia oleracea	Choi,Y.J., Hong,S.B. and Shin,H.D.	Mycol. Res. 111 (PT 4), 381-391 (2007)	2008-06-19	Peronospora effusa	Spinacia oleracea	from GenBank	798	0	6	Pe. effusa	None, GenBank annotation error: see cluster 70	id.	id.	~
DQ643893	542832	Peronospora effusa	Spinacia oleracea	Choi,Y.J., Hong,S.B. and Shin,H.D.	Mycol. Res. 111 (PT 4), 381-391 (2007)	2008-06-19	Peronospora effusa	Spinacia oleracea	from GenBank	798	0	6	Pe. effusa	None, GenBank annotation error: see cluster 70	id.	id.	~
DQ643881	542832	Peronospora effusa	Spinacia oleracea	Choi,Y.J., Hong,S.B. and Shin,H.D.	Mycol. Res. 111 (PT 4), 381-391 (2007)	2008-06-19	Peronospora effusa	Spinacia oleracea	from GenBank	798	0	6	Pe. effusa	None, GenBank annotation error: see cluster 70	id.	id.	~
DQ643870	542832	Peronospora effusa	Spinacia oleracea	Choi,Y.J., Hong,S.B. and Shin,H.D.	Mycol. Res. 111 (PT 4), 381-391 (2007)	2008-06-19	Peronospora effusa	Spinacia oleracea	from GenBank	798	0	6	Pe. effusa	None, GenBank annotation error: see cluster 70	id.	id.	~
DQ643887	542832	Peronospora effusa	Spinacia oleracea	Choi,Y.J., Hong,S.B. and Shin,H.D.	Mycol. Res. 111 (PT 4), 381-391 (2007)	2008-06-19	Peronospora effusa	Spinacia oleracea	from GenBank	798	0	6	Pe. effusa	None, GenBank annotation error: see cluster 70	id.	id.	~
DQ643890	542832	Peronospora effusa	Spinacia oleracea	Choi,Y.J., Hong,S.B. and Shin,H.D.	Mycol. Res. 111 (PT 4), 381-391 (2007)	2008-06-19	Peronospora effusa	Spinacia oleracea	from GenBank	799	0	6	Pe. effusa	None, GenBank annotation error: see cluster 70	id.	id.	~
DQ643885	542832	Peronospora effusa	Spinacia oleracea	Choi,Y.J., Hong,S.B. and Shin,H.D.	Mycol. Res. 111 (PT 4), 381-391 (2007)	2008-06-19	Peronospora effusa	Spinacia oleracea	from GenBank	798	0	6	Pe. effusa	None, GenBank annotation error: see cluster 70	id.	id.	~
DQ643892	542832	Peronospora effusa	Spinacia oleracea	Choi,Y.J., Hong,S.B. and Shin,H.D.	Mycol. Res. 111 (PT 4), 381-391 (2007)	2008-06-19	Peronospora effusa	Spinacia oleracea	from GenBank	798	0	6	Pe. effusa	None, GenBank annotation error: see cluster 70	id.	id.	~
DQ643883	542832	Peronospora effusa	Spinacia oleracea	Choi,Y.J., Hong,S.B. and Shin,H.D.	Mycol. Res. 111 (PT 4), 381-391 (2007)	2008-06-19	Peronospora effusa	Spinacia oleracea	from GenBank	798	0	6	Pe. effusa	None, GenBank annotation error: see cluster 70	id.	id.	~
DQ643884	542832	Peronospora effusa	Spinacia oleracea	Choi,Y.J., Hong,S.B. and Shin,H.D.	Mycol. Res. 111 (PT 4), 381-391 (2007)	2008-06-19	Peronospora effusa	Spinacia oleracea	from GenBank	798	0	6	Pe. effusa	None, GenBank annotation error: see cluster 70	id.	id.	~
DQ643891	542832	Peronospora effusa	Spinacia oleracea	Choi,Y.J., Hong,S.B. and Shin,H.D.	Mycol. Res. 111 (PT 4), 381-391 (2007)	2008-06-19	Peronospora effusa	Spinacia oleracea	from GenBank	798	0	6	Pe. effusa	None, GenBank annotation error: see cluster 70	id.	id.	~
DQ643886	542832	Peronospora effusa	Spinacia oleracea	Choi,Y.J., Hong,S.B. and Shin,H.D.	Mycol. Res. 111 (PT 4), 381-391 (2007)	2008-06-19	Peronospora effusa	Spinacia oleracea	from GenBank	798	0	6	Pe. effusa	None, GenBank annotation error: see cluster 70	id.	id.	~
DQ643899	542832	Peronospora effusa	Spinacia oleracea	Choi,Y.J., Hong,S.B. and Shin,H.D.	Mycol. Res. 111 (PT 4), 381-391 (2007)	2008-06-19	Peronospora effusa	Spinacia oleracea	from GenBank	798	0	6	Pe. effusa	None, GenBank annotation error: see cluster 70	id.	id.	~
DQ643900	542832	Peronospora effusa	Spinacia oleracea	Choi,Y.J., Hong,S.B. and Shin,H.D.	Mycol. Res. 111 (PT 4), 381-391 (2007)	2008-06-19	Peronospora effusa	Spinacia oleracea	from GenBank	798	0	6	Pe. effusa	None, GenBank annotation error: see cluster 70	id.	id.	~
DQ643855	542832	Peronospora effusa	Spinacia oleracea	Choi,Y.J., Hong,S.B. and Shin,H.D.	Mycol. Res. 111 (PT 4), 381-391 (2007)	2008-06-19	Peronospora effusa	Spinacia oleracea	from GenBank	798	0	6	Pe. effusa	None, GenBank annotation error: see cluster 70	id.	id.	~
DQ643882	542832	Peronospora effusa	Spinacia oleracea	Choi,Y.J., Hong,S.B. and Shin,H.D.	Mycol. Res. 111 (PT 4), 381-391 (2007)	2008-06-19	Peronospora effusa	Spinacia oleracea	from GenBank	798	0	6	Pe. effusa	None, GenBank annotation error: see cluster 70	id.	id.	~
DQ643871	542832	Peronospora effusa	Spinacia oleracea	Choi,Y.J., Hong,S.B. and Shin,H.D.	Mycol. Res. 111 (PT 4), 381-391 (2007)	2008-06-19	Peronospora effusa	Spinacia oleracea	from GenBank	798	0	6	Pe. effusa	None, GenBank annotation error: see cluster 70	id.	id.	~
DQ643894	542832	Peronospora effusa	Spinacia oleracea	Choi,Y.J., Hong,S.B. and Shin,H.D.	Mycol. Res. 111 (PT 4), 381-391 (2007)	2008-06-19	Peronospora effusa	Spinacia oleracea	from GenBank	798	0	6	Pe. effusa	None, GenBank annotation error: see cluster 70	id.	id.	~
DQ643896	542832	Peronospora effusa	Spinacia oleracea	Choi,Y.J., Hong,S.B. and Shin,H.D.	Mycol. Res. 111 (PT 4), 381-391 (2007)	2008-06-19	Peronospora effusa	Spinacia oleracea	from GenBank	798	0	6	Pe. effusa	None, GenBank annotation error: see cluster 70	id.	id.	~
DQ643898	542832	Peronospora effusa	Spinacia oleracea	Choi,Y.J., Hong,S.B. and Shin,H.D.	Mycol. Res. 111 (PT 4), 381-391 (2007)	2008-06-19	Peronospora effusa	Spinacia oleracea	from GenBank	798	0	6	Pe. effusa	None, GenBank annotation error: see cluster 70	id.	id.	~
DQ643850	542832	Peronospora effusa	Spinacia oleracea	Choi,Y.J., Hong,S.B. and Shin,H.D.	Mycol. Res. 111 (PT 4), 381-391 (2007)	2008-06-19	Peronospora effusa	Spinacia oleracea	from GenBank	798	0	6	Pe. effusa	None, GenBank annotation error: see cluster 70	id.	id.	~
DQ643861	542832	Peronospora effusa	Spinacia oleracea	Choi,Y.J., Hong,S.B. and Shin,H.D.	Mycol. Res. 111 (PT 4), 381-391 (2007)	2008-06-19	Peronospora effusa	Spinacia oleracea	from GenBank	798	0	6	Pe. effusa	None, GenBank annotation error: see cluster 70	id.	id.	~
DQ643847	542832	Peronospora effusa	Spinacia oleracea	Choi,Y.J., Hong,S.B. and Shin,H.D.	Mycol. Res. 111 (PT 4), 381-391 (2007)	2008-06-19	Peronospora effusa	Spinacia oleracea	from GenBank	797	0	6	Pe. effusa	None, GenBank annotation error: see cluster 70	id.	id.	~
DQ643848	542832	Peronospora effusa	Spinacia oleracea	Choi,Y.J., Hong,S.B. and Shin,H.D.	Mycol. Res. 111 (PT 4), 381-391 (2007)	2008-06-19	Peronospora effusa	Spinacia oleracea	from GenBank	798	0	6	Pe. effusa	None, GenBank annotation error: see cluster 70	id.	id.	~
DQ643895	542832	Peronospora effusa	Spinacia oleracea	Choi,Y.J., Hong,S.B. and Shin,H.D.	Mycol. Res. 111 (PT 4), 381-391 (2007)	2008-06-19	Peronospora effusa	Spinacia oleracea	from GenBank	798	0	6	Pe. effusa	None, GenBank annotation error: see cluster 70	id.	id.	~
DQ643853	542832	Peronospora effusa	Spinacia oleracea	Choi,Y.J., Hong,S.B. and Shin,H.D.	Mycol. Res. 111 (PT 4), 381-391 (2007)	2008-06-19	Peronospora effusa	Spinacia oleracea	from GenBank	797	0	6	Pe. effusa	None, GenBank annotation error: see cluster 70	id.	id.	~
DQ643865	542832	Peronospora effusa	Spinacia oleracea	Choi,Y.J., Hong,S.B. and Shin,H.D.	Mycol. Res. 111 (PT 4), 381-391 (2007)	2008-06-19	Peronospora effusa	Spinacia oleracea	from GenBank	798	0	6	Pe. effusa	None, GenBank annotation error: see cluster 70	id.	id.	~
DQ643846	542832	Peronospora effusa	Spinacia oleracea	Choi,Y.J., Hong,S.B. and Shin,H.D.	Mycol. Res. 111 (PT 4), 381-391 (2007)	2008-06-19	Peronospora effusa	Spinacia oleracea	from GenBank	798	0	6	Pe. effusa	None, GenBank annotation error: see cluster 70	id.	id.	~
DQ643889	542832	Peronospora effusa	Spinacia oleracea	Choi,Y.J., Hong,S.B. and Shin,H.D.	Mycol. Res. 111 (PT 4), 381-391 (2007)	2008-06-19	Peronospora effusa	Spinacia oleracea	from GenBank	798	0	6	Pe. effusa	None, GenBank annotation error: see cluster 70	id.	id.	~
DQ643897	542832	Peronospora effusa	Spinacia oleracea	Choi,Y.J., Hong,S.B. and Shin,H.D.	Mycol. Res. 111 (PT 4), 381-391 (2007)	2008-06-19	Peronospora effusa	Spinacia oleracea	from GenBank	800	0	6	Pe. effusa	None, GenBank annotation error: see cluster 70	id.	id.	~
DQ643873	542832	Peronospora effusa	Spinacia oleracea	Choi,Y.J., Hong,S.B. and Shin,H.D.	Mycol. Res. 111 (PT 4), 381-391 (2007)	2008-06-19	Peronospora effusa	Spinacia oleracea	from GenBank	798	0	6	Pe. effusa	None, GenBank annotation error: see cluster 70	id.	id.	~
DQ643854	542832	Peronospora effusa	Spinacia oleracea	Choi,Y.J., Hong,S.B. and Shin,H.D.	Mycol. Res. 111 (PT 4), 381-391 (2007)	2008-06-19	Peronospora effusa	Spinacia oleracea	from GenBank	797	0	6	Pe. effusa	None, GenBank annotation error: see cluster 70	id.	id.	~
DQ643877	542832	Peronospora effusa	Spinacia oleracea	Choi,Y.J., Hong,S.B. and Shin,H.D.	Mycol. Res. 111 (PT 4), 381-391 (2007)	2008-06-19	Peronospora effusa	Spinacia oleracea	from GenBank	798	0	6	Pe. effusa	None, GenBank annotation error: see cluster 70	id.	id.	~
AF528560	542832	Peronospora effusa	Spinacia oleracea	Choi,Y.J., Hong,S.B. and Shin,H.D.	Unpublished	2008-06-18	Peronospora effusa	Spinacia oleracea	from GenBank	1201	0	6	Pe. effusa	None, GenBank annotation error: see cluster 70	id.	Choi et al. (2007)	~
DQ643859	542832	Peronospora effusa	Spinacia oleracea	Choi,Y.J., Hong,S.B. and Shin,H.D.	Mycol. Res. 111 (PT 4), 381-391 (2007)	2008-06-19	Peronospora effusa	Spinacia oleracea	from GenBank	798	0	6	Pe. effusa	None, GenBank annotation error: see cluster 70	id.	id.	~
DQ643858	542832	Peronospora effusa	Spinacia oleracea	Choi,Y.J., Hong,S.B. and Shin,H.D.	Mycol. Res. 111 (PT 4), 381-391 (2007)	2008-06-19	Peronospora effusa	Spinacia oleracea	from GenBank	798	0	6	Pe. effusa	None, GenBank annotation error: see cluster 70	id.	id.	~
DQ643849	542832	Peronospora effusa	Spinacia oleracea	Choi,Y.J., Hong,S.B. and Shin,H.D.	Mycol. Res. 111 (PT 4), 381-391 (2007)	2008-06-19	Peronospora effusa	Spinacia oleracea	from GenBank	798	0	6	Pe. effusa	None, GenBank annotation error: see cluster 70	id.	id.	~
DQ643878	542832	Peronospora effusa	Spinacia oleracea	Choi,Y.J., Hong,S.B. and Shin,H.D.	Mycol. Res. 111 (PT 4), 381-391 (2007)	2008-06-19	Peronospora effusa	Spinacia oleracea	from GenBank	800	0	6	Pe. effusa	None, GenBank annotation error: see cluster 70	id.	id.	~
DQ643863	542832	Peronospora effusa	Spinacia oleracea	Choi,Y.J., Hong,S.B. and Shin,H.D.	Mycol. Res. 111 (PT 4), 381-391 (2007)	2008-06-19	Peronospora effusa	Spinacia oleracea	from GenBank	798	0	6	Pe. effusa	None, GenBank annotation error: see cluster 70	id.	id.	~
DQ643862	542832	Peronospora effusa	Spinacia oleracea	Choi,Y.J., Hong,S.B. and Shin,H.D.	Mycol. Res. 111 (PT 4), 381-391 (2007)	2008-06-19	Peronospora effusa	Spinacia oleracea	from GenBank	798	0	6	Pe. effusa	None, GenBank annotation error: see cluster 70	id.	id.	~
DQ643888	542832	Peronospora effusa	Spinacia oleracea	Choi,Y.J., Hong,S.B. and Shin,H.D.	Mycol. Res. 111 (PT 4), 381-391 (2007)	2008-06-19	Peronospora effusa	Spinacia oleracea	from GenBank	798	0	6	Pe. effusa	None, GenBank annotation error: see cluster 70	id.	id.	~
DQ643852	542832	Peronospora effusa	Spinacia oleracea	Choi,Y.J., Hong,S.B. and Shin,H.D.	Mycol. Res. 111 (PT 4), 381-391 (2007)	2008-06-19	Peronospora effusa	Spinacia oleracea	from GenBank	798	0	6	Pe. effusa	None, GenBank annotation error: see cluster 70	id.	id.	~
DQ643879	542832	Peronospora effusa	Spinacia oleracea	Choi,Y.J., Hong,S.B. and Shin,H.D.	Mycol. Res. 111 (PT 4), 381-391 (2007)	2008-06-19	Peronospora effusa	Spinacia oleracea	from GenBank	799	0	6	Pe. effusa	None, GenBank annotation error: see cluster 70	id.	id.	~
DQ643851	542832	Peronospora effusa	Spinacia oleracea	Choi,Y.J., Hong,S.B. and Shin,H.D.	Mycol. Res. 111 (PT 4), 381-391 (2007)	2008-06-19	Peronospora effusa	Spinacia oleracea	from GenBank	797	0	6	Pe. effusa	None, GenBank annotation error: see cluster 70	id.	id.	~
DQ643869	542832	Peronospora effusa	Spinacia oleracea	Choi,Y.J., Hong,S.B. and Shin,H.D.	Mycol. Res. 111 (PT 4), 381-391 (2007)	2008-06-19	Peronospora effusa	Spinacia oleracea	from GenBank	798	0	6	Pe. effusa	None, GenBank annotation error: see cluster 70	id.	id.	~
DQ643860	542832	Peronospora effusa	Spinacia oleracea	Choi,Y.J., Hong,S.B. and Shin,H.D.	Mycol. Res. 111 (PT 4), 381-391 (2007)	2008-06-19	Peronospora effusa	Spinacia oleracea	from GenBank	798	0	6	Pe. effusa	None, GenBank annotation error: see cluster 70	id.	id.	~
DQ643856	542832	Peronospora effusa	Spinacia oleracea	Choi,Y.J., Hong,S.B. and Shin,H.D.	Mycol. Res. 111 (PT 4), 381-391 (2007)	2008-06-19	Peronospora effusa	Spinacia oleracea	from GenBank	798	0	6	Pe. effusa	None, GenBank annotation error: see cluster 70	id.	id.	~
DQ643901	542832	Peronospora effusa	Spinacia oleracea	Choi,Y.J., Hong,S.B. and Shin,H.D.	Mycol. Res. 111 (PT 4), 381-391 (2007)	2008-06-19	Peronospora effusa	Spinacia oleracea	from GenBank	798	0	6	Pe. effusa	None, GenBank annotation error: see cluster 70	id.	id.	~
EF614964	162102	Peronospora variabilis	Chenopodium album	Choi,Y.J., Denchev,C.M. and Shin,H.D.	Mycopathologia 165 (3), 155-164 (2008)	2008-05-05	Peronospora variabilis	Chenopodium album	from GenBank	795	0	7	Chenopodium album parasite C7	Ib/Ic?	id.	id.	This accession is from Eastern Asian origin which may or may not represent that host species.
EF614958	466189	Peronospora sp. SMK20063	Chenopodium ambrosioides	Choi,Y.J., Denchev,C.M. and Shin,H.D.	Mycopathologia 165 (3), 155-164 (2008)	2008-05-05	~	Chenopodium ambrosioides	from GenBank	795	0	8	Chenopodium ambrosioides parasite C8	~	~	id.	~
EF614957	466188	Peronospora sp. DAR45530	Chenopodium ambrosioides	Choi,Y.J., Denchev,C.M. and Shin,H.D.	Mycopathologia 165 (3), 155-164 (2008)	2008-05-05	~	Chenopodium ambrosioides	from GenBank	794	0	9	Chenopodium ambrosioides parasite C9	~	~	id.	~
EF614955	481876	Peronospora farinosa f. sp. chenopodii	Chenopodium hybridum	Choi,Y.J., Denchev,C.M. and Shin,H.D.	Mycopathologia 165 (3), 155-164 (2008)	2008-05-05	Peronospora farinosa	Chenopodium hybridum	from GenBank	798	0	10	Pe. chenopodii	Ia	id.	id.	~
EF174939	435244	Peronospora sp. GG133	UNKNOWN	Garcia-Blazquez,G., Goeker,M., Voglmayr,H., Martin,M.P.,	Mycol. Res. 112 (5), 502-512 (2008)	2008-04-28	~	Trifolium subterraneum	from publication	985	0	11	Trifolium subterraneum parasite C11	~	~	id.	Gäumann (1923): 215 mentions this host for P. pratensis, but states that this parasite was insufficiently studied and of uncertain position is uncertain
EF174924	435251	Peronospora sp. HV956	UNKNOWN	Garcia-Blazquez,G., Goeker,M., Voglmayr,H., Martin,M.P.,	Mycol. Res. 112 (5), 502-512 (2008)	2008-04-28	~	Trifolium resupinatum	from publication	1132	0	12	Trifolium resupinatum parasite C12	~	~	id.	Gäumann (1923): 215 mentions this host for P. pratensis, but states that this parasite was insufficiently studied and of uncertain position is uncertain
EF174970	162103	Peronospora trifoliorum	UNKNOWN	Garcia-Blazquez,G., Goeker,M., Voglmayr,H., Martin,M.P.,	Mycol. Res. 112 (5), 502-512 (2008)	2008-04-28	Peronospora trifoliorum	Trifolium cf. medium	from publication	940	0	13	Trifolium medium parasite [Pe. trifoliorum p.p.]	Ia	+ Medicago sativa	Gustavsson (1959): 135	~
EF174963	162103	Peronospora trifoliorum	UNKNOWN	Garcia-Blazquez,G., Goeker,M., Voglmayr,H., Martin,M.P.,	Mycol. Res. 112 (5), 502-512 (2008)	2008-04-28	Peronospora trifoliorum	Trifolium cf. medium	from publication	940	0	13	Trifolium medium parasite [Pe. trifoliorum p.p.]	Ia	+ Medicago sativa	Gustavsson (1959): 135	~
EF174967	162103	Peronospora trifoliorum	UNKNOWN	Garcia-Blazquez,G., Goeker,M., Voglmayr,H., Martin,M.P.,	Mycol. Res. 112 (5), 502-512 (2008)	2008-04-28	Peronospora trifoliorum	Trifolium cf. medium	from publication	919	0	13	Trifolium medium parasite [Pe. trifoliorum p.p.]	Ia	+ Medicago sativa	Gustavsson (1959): 135	~
EF174926	162103	Peronospora trifoliorum	UNKNOWN	Garcia-Blazquez,G., Goeker,M., Voglmayr,H., Martin,M.P.,	Mycol. Res. 112 (5), 502-512 (2008)	2008-04-28	Peronospora trifoliorum	Trifolium medium	from publication	958	0	13	Trifolium medium parasite [Pe. trifoliorum p.p.]	Ia	+ Medicago sativa	Gustavsson (1959): 135	~
EF174922	162103	Peronospora trifoliorum	UNKNOWN	Garcia-Blazquez,G., Goeker,M., Voglmayr,H., Martin,M.P.,	Mycol. Res. 112 (5), 502-512 (2008)	2008-04-28	Peronospora trifoliorum	Trifolium medium	from publication	958	0	13	Trifolium medium parasite [Pe. trifoliorum p.p.]	Ia	+ Medicago sativa	Gustavsson (1959): 135	~
EF174958	162103	Peronospora trifoliorum	UNKNOWN	Garcia-Blazquez,G., Goeker,M., Voglmayr,H., Martin,M.P.,	Mycol. Res. 112 (5), 502-512 (2008)	2008-04-28	Peronospora trifoliorum	Trifolium medium	from publication	945	0	13	Trifolium medium parasite [Pe. trifoliorum p.p.]	Ia	+ Medicago sativa	Gustavsson (1959): 135	~
EF174928	162103	Peronospora trifoliorum	UNKNOWN	Garcia-Blazquez,G., Goeker,M., Voglmayr,H., Martin,M.P.,	Mycol. Res. 112 (5), 502-512 (2008)	2008-04-28	Peronospora trifoliorum	Trifolium medium	from publication	910	0	13	Trifolium medium parasite [Pe. trifoliorum p.p.]	Ia	+ Medicago sativa	Gustavsson (1959): 135	~
EF174972	162103	Peronospora trifoliorum	UNKNOWN	Garcia-Blazquez,G., Goeker,M., Voglmayr,H., Martin,M.P.,	Mycol. Res. 112 (5), 502-512 (2008)	2008-04-28	Peronospora trifoliorum	Trifolium medium	from publication	954	0	13	Trifolium medium parasite [Pe. trifoliorum p.p.]	Ia	+ Medicago sativa	Gustavsson (1959): 135	~
EF174927	162103	Peronospora trifoliorum	UNKNOWN	Garcia-Blazquez,G., Goeker,M., Voglmayr,H., Martin,M.P.,	Mycol. Res. 112 (5), 502-512 (2008)	2008-04-28	Peronospora trifoliorum	Trifolium medium	from publication	908	0	13	Trifolium medium parasite [Pe. trifoliorum p.p.]	Ia	+ Medicago sativa	Gustavsson (1959): 135	~
EF174971	162103	Peronospora trifoliorum	UNKNOWN	Garcia-Blazquez,G., Goeker,M., Voglmayr,H., Martin,M.P.,	Mycol. Res. 112 (5), 502-512 (2008)	2008-04-28	Peronospora trifoliorum	Trifolium medium	from publication	962	0	13	Trifolium medium parasite [Pe. trifoliorum p.p.]	Ia	+ Medicago sativa	Gustavsson (1959): 135	~
EF174966	435253	Peronospora sp. MG1796	UNKNOWN	Garcia-Blazquez,G., Goeker,M., Voglmayr,H., Martin,M.P.,	Mycol. Res. 112 (5), 502-512 (2008)	2008-04-28	~	Trifolium medium	from publication	1166	4	14	Trifolium medium parasite [Pe. trifoliorum p.p.]	~	~	Gustavsson (1959): 135	~
EF174921	435248	Peronospora sp. HV27.1F-27.3	UNKNOWN	Garcia-Blazquez,G., Goeker,M., Voglmayr,H., Martin,M.P.,	Mycol. Res. 112 (5), 502-512 (2008)	2008-04-28	~	Trifolium sp.	from publication	1125	2	14	Trifolium medium parasite [Pe. trifoliorum p.p.]	~	~	Gustavsson (1959): 135	~
EF174920	162104	Peronospora trifolii-minoris	UNKNOWN	Garcia-Blazquez,G., Goeker,M., Voglmayr,H., Martin,M.P.,	Mycol. Res. 112 (5), 502-512 (2008)	2008-04-28	Peronospora trifolii-minoris	Trifolium campestre	from publication	858	1	15	Trifolium campestre parasite [Pe. trifolii-minoris p.p.]	Ib/Ic?	+ Trifolium aureum, T. badium, T. dubium, T. patens	Gustavsson (1959): 139	~
EF174959	162104	Peronospora trifolii-minoris	UNKNOWN	Garcia-Blazquez,G., Goeker,M., Voglmayr,H., Martin,M.P.,	Mycol. Res. 112 (5), 502-512 (2008)	2008-04-28	Peronospora trifolii-minoris	Trifolium campestre	from publication	822	0	15	Trifolium campestre parasite [Pe. trifolii-minoris p.p.]	Ib/Ic?	+ Trifolium aureum, T. badium, T. dubium, T. patens	Gustavsson (1959): 139	~
EF174917	162106	Peronospora trifolii-alpestris	UNKNOWN	Garcia-Blazquez,G., Goeker,M., Voglmayr,H., Martin,M.P.,	Mycol. Res. 112 (5), 502-512 (2008)	2008-04-28	Peronospora trifolii-alpestris	Trifolium alpestre	from publication	1171	0	16	Trifolium striatum/alpestre parasite [Pe. trifolii-alpestris p.p.]	Ib/Ic?	id.	Gustavsson (1959): 137, Gäumann (1923): 210	~
EF174940	435245	Peronospora sp. GG56	UNKNOWN	Garcia-Blazquez,G., Goeker,M., Voglmayr,H., Martin,M.P.,	Mycol. Res. 112 (5), 502-512 (2008)	2008-04-28	~	Trifolium striatum	from publication	1496	0	16	Trifolium striatum/alpestre parasite [Pe. trifolii-alpestris p.p.]	Ib/Ic?	~	Gustavsson (1959): 137, Gäumann (1923): 210	apparently an additional host
EF174913	162104	Peronospora trifolii-minoris	UNKNOWN	Garcia-Blazquez,G., Goeker,M., Voglmayr,H., Martin,M.P.,	Mycol. Res. 112 (5), 502-512 (2008)	2008-04-28	Peronospora trifolii-minoris	Trifolium campestre	from publication	985	0	17	Trifolium campestre/dubium parasite [Pe. trifolii-minoris p.p.]	Ib/Ic?	+ Trifolium aureum, T. badium, T. dubium, T. patens	Gustavsson (1959): 139	~
EF174942	162104	Peronospora trifolii-minoris	UNKNOWN	Garcia-Blazquez,G., Goeker,M., Voglmayr,H., Martin,M.P.,	Mycol. Res. 112 (5), 502-512 (2008)	2008-04-28	Peronospora trifolii-minoris	Trifolium dubium	from publication	917	0	17	Trifolium campestre/dubium parasite [Pe. trifolii-minoris p.p.]	Ib/Ic?	+ Trifolium aureum, T. badium, T. campestre, T. patens	Gustavsson (1959): 139	~
EF174923	162104	Peronospora trifolii-minoris	UNKNOWN	Garcia-Blazquez,G., Goeker,M., Voglmayr,H., Martin,M.P.,	Mycol. Res. 112 (5), 502-512 (2008)	2008-04-28	Peronospora trifolii-minoris	Trifolium dubium	from publication	897	1	17	Trifolium campestre/dubium parasite [Pe. trifolii-minoris p.p.]	Ib/Ic?	+ Trifolium aureum, T. badium, T. campestre, T. patens	Gustavsson (1959): 139	~
EF174912	434360	Peronospora trifolii-arvensis	UNKNOWN	Garcia-Blazquez,G., Goeker,M., Voglmayr,H., Martin,M.P.,	Mycol. Res. 112 (5), 502-512 (2008)	2008-04-28	Peronospora trifolii-arvensis	Trifolium arvense	from publication	1054	0	18	Pe. trifolii-arvensis	~	id.	Gustavsson (1959): 137, Gäumann (1923): 210	~
EF174936	434356	Peronospora ornithopi	UNKNOWN	Garcia-Blazquez,G., Goeker,M., Voglmayr,H., Martin,M.P.,	Mycol. Res. 112 (5), 502-512 (2008)	2008-04-28	Peronospora ornithopi	Ornithopus compressus	from publication	782	0	19	Pe. ornithopi	~	Ornithopus perpusillus	Gustavsson (1959): 143	~
EF174909	434356	Peronospora ornithopi	UNKNOWN	Garcia-Blazquez,G., Goeker,M., Voglmayr,H., Martin,M.P.,	Mycol. Res. 112 (5), 502-512 (2008)	2008-04-28	Peronospora ornithopi	Ornithopus compressus	from publication	834	2	19	Pe. ornithopi	~	Ornithopus perpusillus	Gustavsson (1959): 143	~
EF174908	434356	Peronospora ornithopi	UNKNOWN	Garcia-Blazquez,G., Goeker,M., Voglmayr,H., Martin,M.P.,	Mycol. Res. 112 (5), 502-512 (2008)	2008-04-28	Peronospora ornithopi	Ornithopus perpusillus	from publication	846	0	19	Pe. ornithopi	~	Ornithopus perpusillus	Gustavsson (1959): 143	~
EF174911	162107	Peronospora aestivalis	UNKNOWN	Garcia-Blazquez,G., Goeker,M., Voglmayr,H., Martin,M.P.,	Mycol. Res. 112 (5), 502-512 (2008)	2008-04-28	Peronospora aestivalis	Medicago truncatula	from publication	864	0	20	Medicago truncatula parasite [Pe. aestivalis s.l. p.p.]	Ia	Medicago lupulina, M. minima, M. sativa, M. polymorpha, M. sativa ssp. falcata	id.	~
EF174941	162107	Peronospora aestivalis	UNKNOWN	Garcia-Blazquez,G., Goeker,M., Voglmayr,H., Martin,M.P.,	Mycol. Res. 112 (5), 502-512 (2008)	2008-04-28	Peronospora aestivalis	Medicago truncatula	from publication	819	0	20	Medicago truncatula parasite [Pe. aestivalis s.l. p.p.]	Ia	Medicago lupulina, M. minima, M. sativa, M. polymorpha, M. sativa ssp. falcata	id.	~
EF174903	162107	Peronospora aestivalis	UNKNOWN	Garcia-Blazquez,G., Goeker,M., Voglmayr,H., Martin,M.P.,	Mycol. Res. 112 (5), 502-512 (2008)	2008-04-28	Peronospora aestivalis	Medicago truncatula	from publication	863	0	20	Medicago truncatula parasite [Pe. aestivalis s.l. p.p.]	Ia	Medicago lupulina, M. minima, M. sativa, M. polymorpha, M. sativa ssp. falcata	id.	~
EF174937	162099	Peronospora coronillae	UNKNOWN	Garcia-Blazquez,G., Goeker,M., Voglmayr,H., Martin,M.P.,	Mycol. Res. 112 (5), 502-512 (2008)	2008-04-28	Peronospora coronillae	Coronilla repanda subsp. dura	from publication	809	0	21	Coronilla repanda/scorpioides/Tetragonolobus maritimus parasite [Pe. coronillae p.p. == P. tetragonolobi]	Ia, (IIa)	Coronilla varia, C. scorpioides (for P. coronillae)	Gäumann (1923): 190	There are two type hosts for P. coronillae, but the parasites are in different clusters. Both type hosts were described in Gäumann (1923), so there is no historical preference rule to apply. Coronilla and Tetragonolobus are closely related genera (tribe Loteae). It has to be investigated whether the Coronilla and Tetragonolobus parasites are really conspecific.
EF174907	162099	Peronospora coronillae	UNKNOWN	Garcia-Blazquez,G., Goeker,M., Voglmayr,H., Martin,M.P.,	Mycol. Res. 112 (5), 502-512 (2008)	2008-04-28	Peronospora coronillae	Coronilla repanda subsp. dura	from publication	822	0	21	Coronilla repanda/scorpioides/Tetragonolobus maritimus parasite [Pe. coronillae p.p. == P. tetragonolobi]	Ia, (IIa)	Coronilla varia, C. scorpioides (for P. coronillae)	Gäumann (1923): 190	There are two type hosts for P. coronillae, but the parasites are in different clusters. Both type hosts were described in Gäumann (1923), so there is no historical preference rule to apply. Coronilla and Tetragonolobus are closely related genera (tribe Loteae). It has to be investigated whether the Coronilla and Tetragonolobus parasites are really conspecific.
EF174938	162099	Peronospora coronillae	UNKNOWN	Garcia-Blazquez,G., Goeker,M., Voglmayr,H., Martin,M.P.,	Mycol. Res. 112 (5), 502-512 (2008)	2008-04-28	Peronospora coronillae	Coronilla scorpioides	from publication	752	0	21	Coronilla repanda/scorpioides/Tetragonolobus maritimus parasite [Pe. coronillae p.p. == P. tetragonolobi]	Ia, (IIa)	+ Coronilla varia (for P. coronillae)	Gäumann (1923): 190	There are two type hosts for P. coronillae, but the parasites are in different clusters. Both type hosts were described in Gäumann (1923), so there is no historical preference rule to apply. Coronilla and Tetragonolobus are closely related genera (tribe Loteae). It has to be investigated whether the Coronilla and Tetragonolobus parasites are really conspecific.
EF174910	162099	Peronospora coronillae	UNKNOWN	Garcia-Blazquez,G., Goeker,M., Voglmayr,H., Martin,M.P.,	Mycol. Res. 112 (5), 502-512 (2008)	2008-04-28	Peronospora coronillae	Coronilla scorpioides	from publication	822	0	21	Coronilla repanda/scorpioides/Tetragonolobus maritimus parasite [Pe. coronillae p.p. == P. tetragonolobi]	Ia, (IIa)	+ Coronilla varia (for P. coronillae)	Gäumann (1923): 190	There are two type hosts for P. coronillae, but the parasites are in different clusters. Both type hosts were described in Gäumann (1923), so there is no historical preference rule to apply. Coronilla and Tetragonolobus are closely related genera (tribe Loteae). It has to be investigated whether the Coronilla and Tetragonolobus parasites are really conspecific.
EF174901	434353	Peronospora tetragonolobi	UNKNOWN	Garcia-Blazquez,G., Goeker,M., Voglmayr,H., Martin,M.P.,	Mycol. Res. 112 (5), 502-512 (2008)	2008-04-28	Peronospora tetragonolobi	Lotus maritimus	from publication	851	0	21	Coronilla repanda/scorpioides/Tetragonolobus maritimus parasite [Pe. coronillae p.p. == P. tetragonolobi]	(IIa)	Tetragonolobus maritimus (for P. tetragonolobi)	Gäumann (1923): 209	There are two type hosts for P. coronillae, but the parasites are in different clusters. Both type hosts were described in Gäumann (1923), so there is no historical preference rule to apply. Coronilla and Tetragonolobus are closely related genera (tribe Loteae). It has to be investigated whether the Coronilla and Tetragonolobus parasites are really conspecific.
EF174897	434353	Peronospora tetragonolobi	UNKNOWN	Garcia-Blazquez,G., Goeker,M., Voglmayr,H., Martin,M.P.,	Mycol. Res. 112 (5), 502-512 (2008)	2008-04-28	Peronospora tetragonolobi	Lotus maritimus	from publication	865	0	21	Coronilla repanda/scorpioides/Tetragonolobus maritimus parasite [Pe. coronillae p.p. == P. tetragonolobi]	(IIa)	Tetragonolobus maritimus (for P. tetragonolobi)	Gäumann (1923): 209	There are two type hosts for P. coronillae, but the parasites are in different clusters. Both type hosts were described in Gäumann (1923), so there is no historical preference rule to apply. Coronilla and Tetragonolobus are closely related genera (tribe Loteae). It has to be investigated whether the Coronilla and Tetragonolobus parasites are really conspecific.
EF174896	434352	Peronospora lathyrina	UNKNOWN	Garcia-Blazquez,G., Goeker,M., Voglmayr,H., Martin,M.P.,	Mycol. Res. 112 (5), 502-512 (2008)	2008-04-28	Peronospora lathyrina	Lathyrus latifolius	from publication	871	0	22	Pe. lathyrina	~	id.	id.	~
EF174898	230365	Peronospora ervi	UNKNOWN	Garcia-Blazquez,G., Goeker,M., Voglmayr,H., Martin,M.P.,	Mycol. Res. 112 (5), 502-512 (2008)	2008-04-28	Peronospora ervi	Vicia tetrasperma	from publication	824	1	23	Vicia tetrasperma parasite C23	Ia	~	Cunnington (2006)	This cluster is not conspecific with Pe. ervi (its type host is V. hirsuta).
EF174893	230365	Peronospora ervi	UNKNOWN	Garcia-Blazquez,G., Goeker,M., Voglmayr,H., Martin,M.P.,	Mycol. Res. 112 (5), 502-512 (2008)	2008-04-28	Peronospora ervi	Vicia tetrasperma	from publication	829	0	23	Vicia tetrasperma parasite C23	Ia	~	Cunnington (2006)	This cluster is not conspecific with Pe. ervi (its type host is V. hirsuta).
EF174945	434349	Peronospora fulva	UNKNOWN	Garcia-Blazquez,G., Goeker,M., Voglmayr,H., Martin,M.P.,	Mycol. Res. 112 (5), 502-512 (2008)	2008-04-28	Peronospora fulva	Lathyrus pratensis	from publication	767	0	24	Pe. fulva	~	+ Lathyrus vernus	id.	The Lathyrus vernus and L. pratensis parasites do notcluster together. For the L. vernus parasite, a later, alternative name is available.
EF174956	434349	Peronospora fulva	UNKNOWN	Garcia-Blazquez,G., Goeker,M., Voglmayr,H., Martin,M.P.,	Mycol. Res. 112 (5), 502-512 (2008)	2008-04-28	Peronospora fulva	Lathyrus pratensis	from publication	853	0	24	Pe. fulva	~	+ Lathyrus vernus	id.	The Lathyrus vernus and L. pratensis parasites do notcluster together. For the L. vernus parasite, a later, alternative name is available.
EF174891	434349	Peronospora fulva	UNKNOWN	Garcia-Blazquez,G., Goeker,M., Voglmayr,H., Martin,M.P.,	Mycol. Res. 112 (5), 502-512 (2008)	2008-04-28	Peronospora fulva	Lathyrus pratensis	from publication	870	0	24	Pe. fulva	~	+ Lathyrus vernus	id.	The Lathyrus vernus and L. pratensis parasites do notcluster together. For the L. vernus parasite, a later, alternative name is available.
EF174890	337961	Peronospora sepium	UNKNOWN	Garcia-Blazquez,G., Goeker,M., Voglmayr,H., Martin,M.P.,	Mycol. Res. 112 (5), 502-512 (2008)	2008-04-28	Peronospora sepium	Vicia sepium	from publication	827	0	25	Pe. sepium	~	id.	id.	~
EF174888	162107	Peronospora aestivalis	UNKNOWN	Garcia-Blazquez,G., Goeker,M., Voglmayr,H., Martin,M.P.,	Mycol. Res. 112 (5), 502-512 (2008)	2008-04-28	Peronospora aestivalis	Medicago polymorpha	from publication	800	0	26	Medicago polymorpha parasite [Pe. aestivalis s.l. p.p.]	Ia	+ Medicago lupulina, M. minima, M. sativa, M. sativa ssp. falcata	id.	~
EF174944	434361	Peronospora orobi	UNKNOWN	Garcia-Blazquez,G., Goeker,M., Voglmayr,H., Martin,M.P.,	Mycol. Res. 112 (5), 502-512 (2008)	2008-04-28	Peronospora orobi	Lathyrus linifolius	from publication	816	1	27	Lathyrus sylvestris/vernus/linifolius/Vicia hybrida parasite [Pe. viciae s.l. p.p.]	(IIa)	Vicia sativa (for P. viciae)	id.	Lathyrus and Vicia are very closely related genera that may be impossible to separate. The name “Peronospora orobi” has been called into question by García-Blázquez et al. (2008).
EF174895	435250	Peronospora sp. HV938	UNKNOWN	Garcia-Blazquez,G., Goeker,M., Voglmayr,H., Martin,M.P.,	Mycol. Res. 112 (5), 502-512 (2008)	2008-04-28	~	Lathyrus sylvestris	from publication	868	0	27	Lathyrus sylvestris/vernus/linifolius/Vicia hybrida parasite [Pe. viciae s.l. p.p.]	(IIa)	Vicia sativa (for P. viciae)	id.	Lathyrus and Vicia are very closely related genera that may be impossible to separate.
EF174894	434351	Peronospora lathyri-verni	UNKNOWN	Garcia-Blazquez,G., Goeker,M., Voglmayr,H., Martin,M.P.,	Mycol. Res. 112 (5), 502-512 (2008)	2008-04-28	Peronospora lathyri-verni	Lathyrus vernus	from publication	867	0	27	Lathyrus sylvestris/vernus/linifolius/Vicia hybrida parasite [Pe. viciae s.l. p.p.]	(IIa)	Vicia sativa (for P. viciae)	id.	Lathyrus and Vicia are very closely related genera that may be impossible to separate. The name “Peronospora lathyri-verni” has been called into question by García-Blázquez et al. (2008).
EF174887	435247	Peronospora sp. HV22.3F	UNKNOWN	Garcia-Blazquez,G., Goeker,M., Voglmayr,H., Martin,M.P.,	Mycol. Res. 112 (5), 502-512 (2008)	2008-04-28	~	Vicia hybrida	from publication	874	0	27	Lathyrus sylvestris/vernus/linifolius/Vicia hybrida parasite [Pe. viciae s.l. p.p.]	(IIa)	Vicia sativa (for P. viciae)	id.	Lathyrus and Vicia are very closely related genera that may be impossible to separate.
EF141313	425781	Peronospora sp. E3	Solenostemon scutellarioides	Belbahri,L., Daughtrey,M.L., Calmin,G. and Lefort,F.	Unpublished	2007-02-18	~	Solenostemon scutellarioides	from GenBank	832	0	28	Solenostemon scutellarioides parasite C28	~	~	Palmateer et al. (2008)	~
EF050035	143453	Pseudoperonospora cubensis	UNKNOWN	Chen,L.S., Cheng,C.W., Chen,R.S. and Tsay,J.G.	Zhi Wu Bao Hu Xue Hui Hui Kan 48, 53-64 (2006)	2006-11-11	Pseudoperonospora cubensis	UNKNOWN	publication unavailable	779	0	29	parasite of unknown host C29 [Ps. cubensis p.p.]	Ia/Ib/Ic?	Cucurbita pepo	Choi et al. (2005)	~
DQ665672	230439	Peronospora tabacina	Nicotiana tabacum	Thines,M.	Unpublished	2006-08-08	Peronospora tabacina	Nicotiana tabacum	from GenBank	800	1	30	Nicotiana parasite C30 [Pe. tabacina p.p.]	Ib	+ Nicotiana suaveolens	Kochman & Majewski (1970): 245	Most likely, the erroneous DQ067898 excludes this one from cluster 71.
DQ500141	383387	Peronospora sp. isolate 079403,57 (BR)	Lamium ampelexicaule	Belbahri,L., Calmin,G., De Kezel,A. and Lefort,F.	Unpublished	2006-05-21	~	Lamium amplexicaule	from GenBank, corrected	811	0	31	Lamium amplexicaule parasite [Pe. lamii s.l. p.p.]	Ia	~	Gäumann (1923): 135	The type host is Lamium purpureum, so „P. lamii sensu lato“ should be used for the accessions from Lamium other than the type.
DQ643902	162118	Peronospora lamii	Lamium amplexicaule	Choi,Y.J., Hong,S.B. and Shin,H.D.	Mycol. Res. 111 (PT 4), 381-391 (2007)	2008-06-19	Peronospora lamii	Lamium amplexicaule	from GenBank	811	0	31	Lamium amplexicaule parasite [Pe. lamii s.l. p.p.]	Ia	Lamium purpureum	Gäumann (1923): 135	The type host is Lamium purpureum, so „P. lamii sensu lato“ should be used for the accessions from Lamium other than the type.
DQ500139	162118	Peronospora lamii	Lamium maculatum	Belbahri,L., Calmin,G. and Lefort,F.	Unpublished	2006-05-21	Peronospora lamii	Lamium maculatum	from GenBank	810	0	32	Lamium maculatum parasite [Pe. lamii s.l. p.p.]	Ia	Lamium purpureum	Gäumann (1923): 135	The type host is Lamium purpureum, so „P. lamii sensu lato“ should be used for the accessions from Lamium other than the type.
DQ500136	383394	Peronospora sp. isolate UASWS0239	Ocimum basilicum	Belbahri,L., Calmin,G., Daughtrey,M. and Lefort,F.	Unpublished	2007-01-23	~	Ocimum basilicum	from GenBank	808	0	33	Solenostemon scutellarioidesOcimum basilicum parasite C33	~	~	Palmateer et al. (2008)	~
DQ500137	383395	Peronospora sp. isolate UASWS0240	Solenostemon scuttelarioides	Belbahri,L., Calmin,G., Daughtrey,M. and Lefort,F.	Unpublished	2006-05-21	~	Solenostemon scutellarioides	from GenBank, corrected	811	0	33	Solenostemon scutellarioidesOcimum basilicum parasite C33	~	~	Palmateer et al. (2008)	~
DQ067900	230439	Peronospora tabacina	UNKNOWN	Johnson,A., Blanco-Meneses,M., Liu,B. and Ristaino,J.B.	Unpublished	2006-04-19	Peronospora tabacina	UNKNOWN	no reference	825	26	34	Nicotiana parasite C34 [Pe. tabacina p.p.]	Ib	Nicotiana suaveolens, N. tabacum	Kochman & Majewski (1970): 245	~
DQ067899	230439	Peronospora tabacina	UNKNOWN	Johnson,A., Blanco-Meneses,M., Liu,B. and Ristaino,J.B.	Unpublished	2006-04-19	Peronospora tabacina	UNKNOWN	no reference	867	13	35	Nicotiana parasite C35 [Pe. tabacina p.p.]	Ib	Nicotiana suaveolens, N. tabacum	Kochman & Majewski (1970): 245	~
DQ500140	383386	Peronospora sp. isolate 079401,55 (BR)	Lamium amplexicaule	Belbahri,L., Calmin,G., De Kezel,A. and Lefort,F.	Unpublished	2006-05-21	~	Lamium amplexicaule	from GenBank	806	0	36	Solenostemon scutellarioides/Lamium amplexicaule/Salvia officinalis parasite C36	~	~	Palmateer et al. (2008)	A sequence from a historic specimen (1939). May be a contamination.
DQ500135	383393	Peronospora sp. isolate UASWS0238	Salvia officinalis	Belbahri,L., Calmin,G., Daughtrey,M. and Lefort,F.	Unpublished	2007-01-23	~	Salvia officinalis	from GenBank	806	0	36	Solenostemon scutellarioides/Lamium amplexicaule/Salvia officinalis parasite C36	~	~	Palmateer et al. (2008)	~
EF141306	425782	Peronospora sp. F1	Solenostemon scutellarioides	Belbahri,L., Daughtrey,M.L., Calmin,G. and Lefort,F.	Unpublished	2007-02-18	~	Solenostemon scutellarioides	from GenBank	813	0	36	Solenostemon scutellarioides/Lamium amplexicaule/Salvia officinalis parasite C36	~	~	Palmateer et al. (2008)	~
DQ523578	386783	Peronospora sp. UASWS0250	Solenostemon scuttelarioides, Lamiaceae	Belbahri,L., Calmin,G., Holcomb,G. and Lefort,F.	Unpublished	2006-06-26	~	Solenostemon scutellarioides	from GenBank, corrected	806	1	36	Solenostemon scutellarioides/Lamium amplexicaule/Salvia officinalis parasite C36	~	~	Palmateer et al. (2008)	~
DQ523581	386786	Peronospora sp. UASWS0253	Solenostemon scuttelarioides, Lamiaceae	Belbahri,L., Calmin,G., Holcomb,G. and Lefort,F.	Unpublished	2006-06-26	~	Solenostemon scutellarioides	from GenBank, corrected	806	0	36	Solenostemon scutellarioides/Lamium amplexicaule/Salvia officinalis parasite C36	~	~	Palmateer et al. (2008)	~
DQ523571	386776	Peronospora sp. UASWS0243	Solenostemon scuttelarioides, Lamiaceae	Belbahri,L., Calmin,G., Holcomb,G. and Lefort,F.	Unpublished	2006-06-26	~	Solenostemon scutellarioides	from GenBank, corrected	806	1	36	Solenostemon scutellarioides/Lamium amplexicaule/Salvia officinalis parasite C36	~	~	Palmateer et al. (2008)	~
DQ403793	376157	Peronospora sp. UASWS0229	Solenostemon scuttelarioides	Belbahri,L., Calmin,G., Daughtrey,M. and Lefort,F.	Unpublished	2006-03-19	~	Solenostemon scutellarioides	from GenBank, corrected	806	0	36	Solenostemon scutellarioides/Lamium amplexicaule/Salvia officinalis parasite C36	~	~	Palmateer et al. (2008)	~
EF141311	425779	Peronospora sp. D2	Solenostemon scutellarioides	Belbahri,L., Daughtrey,M.L., Calmin,G. and Lefort,F.	Unpublished	2007-02-18	~	Solenostemon scutellarioides	from GenBank	845	0	36	Solenostemon scutellarioides/Lamium amplexicaule/Salvia officinalis parasite C36	~	~	Palmateer et al. (2008)	~
DQ523576	386781	Peronospora sp. UASWS0248	Solenostemon scuttelarioides, Lamiaceae	Belbahri,L., Calmin,G., Holcomb,G. and Lefort,F.	Unpublished	2006-06-26	~	Solenostemon scutellarioides	from GenBank, corrected	806	1	36	Solenostemon scutellarioides/Lamium amplexicaule/Salvia officinalis parasite C36	~	~	Palmateer et al. (2008)	~
DQ500134	383392	Peronospora sp. isolate UASWS0237	Solenostemon scuttelarioides	Belbahri,L., Calmin,G., Daughtrey,M. and Lefort,F.	Unpublished	2006-05-21	~	Solenostemon scutellarioides	from GenBank, corrected	807	1	36	Solenostemon scutellarioides/Lamium amplexicaule/Salvia officinalis parasite C36	~	~	Palmateer et al. (2008)	~
EF141309	425775	Peronospora sp. B2	Solenostemon scutellarioides	Belbahri,L., Daughtrey,M.L., Calmin,G. and Lefort,F.	Unpublished	2007-02-18	~	Solenostemon scutellarioides	from GenBank	811	0	36	Solenostemon scutellarioides/Lamium amplexicaule/Salvia officinalis parasite C36	~	~	Palmateer et al. (2008)	~
EF141310	425777	Peronospora sp. C2	Solenostemon scutellarioides	Belbahri,L., Daughtrey,M.L., Calmin,G. and Lefort,F.	Unpublished	2007-02-18	~	Solenostemon scutellarioides	from GenBank	834	0	36	Solenostemon scutellarioides/Lamium amplexicaule/Salvia officinalis parasite C36	~	~	Palmateer et al. (2008)	~
DQ523575	386780	Peronospora sp. UASWS0247	Solenostemon scuttelarioides, Lamiaceae	Belbahri,L., Calmin,G., Holcomb,G. and Lefort,F.	Unpublished	2006-06-26	~	Solenostemon scutellarioides	from GenBank, corrected	806	0	36	Solenostemon scutellarioides/Lamium amplexicaule/Salvia officinalis parasite C36	~	~	Palmateer et al. (2008)	~
DQ523574	386779	Peronospora sp. UASWS0246	Solenostemon scuttelarioides, Lamiaceae	Belbahri,L., Calmin,G., Holcomb,G. and Lefort,F.	Unpublished	2006-06-26	~	Solenostemon scutellarioides	from GenBank, corrected	806	0	36	Solenostemon scutellarioides/Lamium amplexicaule/Salvia officinalis parasite C36	~	~	Palmateer et al. (2008)	~
EF141307	425784	Peronospora sp. G1	Solenostemon scutellarioides	Belbahri,L., Daughtrey,M.L., Calmin,G. and Lefort,F.	Unpublished	2007-02-18	~	Solenostemon scutellarioides	from GenBank	811	0	36	Solenostemon scutellarioides/Lamium amplexicaule/Salvia officinalis parasite C36	~	~	Palmateer et al. (2008)	~
DQ523572	386777	Peronospora sp. UASWS0244	Solenostemon scuttelarioides, Lamiaceae	Belbahri,L., Calmin,G., Holcomb,G. and Lefort,F.	Unpublished	2006-06-26	~	Solenostemon scutellarioides	from GenBank, corrected	806	1	36	Solenostemon scutellarioides/Lamium amplexicaule/Salvia officinalis parasite C36	~	~	Palmateer et al. (2008)	~
EF141304	425778	Peronospora sp. D1	Solenostemon scutellarioides	Belbahri,L., Daughtrey,M.L., Calmin,G. and Lefort,F.	Unpublished	2007-02-18	~	Solenostemon scutellarioides	from GenBank	811	0	36	Solenostemon scutellarioides/Lamium amplexicaule/Salvia officinalis parasite C36	~	~	Palmateer et al. (2008)	~
DQ500138	383396	Peronospora sp. isolate UASWS0241	Solenostemon scuttelarioides	Belbahri,L., Calmin,G., Daughtrey,M. and Lefort,F.	Unpublished	2006-05-21	~	Solenostemon scutellarioides	from GenBank, corrected	806	0	36	Solenostemon scutellarioides/Lamium amplexicaule/Salvia officinalis parasite C36	~	~	Palmateer et al. (2008)	~
DQ523579	386784	Peronospora sp. UASWS0251	Solenostemon scuttelarioides, Lamiaceae	Belbahri,L., Calmin,G., Holcomb,G. and Lefort,F.	Unpublished	2006-06-26	~	Solenostemon scutellarioides	from GenBank, corrected	806	1	36	Solenostemon scutellarioides/Lamium amplexicaule/Salvia officinalis parasite C36	~	~	Palmateer et al. (2008)	~
EF141301	425772	Peronospora sp. A1	Solenostemon scutellarioides	Belbahri,L., Daughtrey,M.L., Calmin,G. and Lefort,F.	Unpublished	2007-02-18	~	Solenostemon scutellarioides	from GenBank	811	0	36	Solenostemon scutellarioides/Lamium amplexicaule/Salvia officinalis parasite C36	~	~	Palmateer et al. (2008)	~
EF141315	425786	Peronospora sp. H1	Solenostemon scutellarioides	Belbahri,L., Daughtrey,M.L., Calmin,G. and Lefort,F.	Unpublished	2007-02-18	~	Solenostemon scutellarioides	from GenBank	834	0	36	Solenostemon scutellarioides/Lamium amplexicaule/Salvia officinalis parasite C36	~	~	Palmateer et al. (2008)	~
DQ523585	386790	Peronospora sp. UASWS0257	Solenostemon scuttelarioides, Lamiaceae	Belbahri,L., Calmin,G., Holcomb,G. and Lefort,F.	Unpublished	2006-06-26	~	Solenostemon scutellarioides	from GenBank, corrected	806	1	36	Solenostemon scutellarioides/Lamium amplexicaule/Salvia officinalis parasite C36	~	~	Palmateer et al. (2008)	~
EF141314	425785	Peronospora sp. G2	Solenostemon scutellarioides	Belbahri,L., Daughtrey,M.L., Calmin,G. and Lefort,F.	Unpublished	2007-02-18	~	Solenostemon scutellarioides	from GenBank	795	0	36	Solenostemon scutellarioides/Lamium amplexicaule/Salvia officinalis parasite C36	~	~	Palmateer et al. (2008)	~
DQ523577	386782	Peronospora sp. UASWS0249	Solenostemon scuttelarioides, Lamiaceae	Belbahri,L., Calmin,G., Holcomb,G. and Lefort,F.	Unpublished	2006-06-26	~	Solenostemon scutellarioides	from GenBank, corrected	806	1	36	Solenostemon scutellarioides/Lamium amplexicaule/Salvia officinalis parasite C36	~	~	Palmateer et al. (2008)	~
EF141308	425773	Peronospora sp. A2	Solenostemon scutellarioides	Belbahri,L., Daughtrey,M.L., Calmin,G. and Lefort,F.	Unpublished	2007-02-18	~	Solenostemon scutellarioides	from GenBank	834	0	36	Solenostemon scutellarioides/Lamium amplexicaule/Salvia officinalis parasite C36	~	~	Palmateer et al. (2008)	~
EF141312	425783	Peronospora sp. F2	Solenostemon scutellarioides	Belbahri,L., Daughtrey,M.L., Calmin,G. and Lefort,F.	Unpublished	2007-02-18	~	Solenostemon scutellarioides	from GenBank	812	0	36	Solenostemon scutellarioides/Lamium amplexicaule/Salvia officinalis parasite C36	~	~	Palmateer et al. (2008)	~
DQ523573	386778	Peronospora sp. UASWS0245	Solenostemon scuttelarioides, Lamiaceae	Belbahri,L., Calmin,G., Holcomb,G. and Lefort,F.	Unpublished	2006-06-26	~	Solenostemon scutellarioides	from GenBank, corrected	806	1	36	Solenostemon scutellarioides/Lamium amplexicaule/Salvia officinalis parasite C36	~	~	Palmateer et al. (2008)	~
DQ523580	386785	Peronospora sp. UASWS0252	Solenostemon scuttelarioides, Lamiaceae	Belbahri,L., Calmin,G., Holcomb,G. and Lefort,F.	Unpublished	2006-06-26	~	Solenostemon scutellarioides	from GenBank, corrected	806	0	36	Solenostemon scutellarioides/Lamium amplexicaule/Salvia officinalis parasite C36	~	~	Palmateer et al. (2008)	~
DQ523583	386788	Peronospora sp. UASWS0255	Solenostemon scuttelarioides, Lamiaceae	Belbahri,L., Calmin,G., Holcomb,G. and Lefort,F.	Unpublished	2006-06-26	~	Solenostemon scutellarioides	from GenBank, corrected	806	0	36	Solenostemon scutellarioides/Lamium amplexicaule/Salvia officinalis parasite C36	~	~	Palmateer et al. (2008)	~
DQ523584	386789	Peronospora sp. UASWS0256	Solenostemon scuttelarioides, Lamiaceae	Belbahri,L., Calmin,G., Holcomb,G. and Lefort,F.	Unpublished	2006-06-26	~	Solenostemon scutellarioides	from GenBank, corrected	806	1	36	Solenostemon scutellarioides/Lamium amplexicaule/Salvia officinalis parasite C36	~	~	Palmateer et al. (2008)	~
EF141305	425780	Peronospora sp. E1	Solenostemon scutellarioides	Belbahri,L., Daughtrey,M.L., Calmin,G. and Lefort,F.	Unpublished	2007-02-18	~	Solenostemon scutellarioides	from GenBank	819	0	36	Solenostemon scutellarioides/Lamium amplexicaule/Salvia officinalis parasite C36	~	~	Palmateer et al. (2008)	~
EF141302	425774	Peronospora sp. B1	Solenostemon scutellarioides	Belbahri,L., Daughtrey,M.L., Calmin,G. and Lefort,F.	Unpublished	2007-02-18	~	Solenostemon scutellarioides	from GenBank	811	0	36	Solenostemon scutellarioides/Lamium amplexicaule/Salvia officinalis parasite C36	~	~	Palmateer et al. (2008)	~
DQ523586	386791	Peronospora sp. UASWS0258	Solenostemon scuttelarioides	Belbahri,L., Calmin,G., Gretillat,J. and Lefort,F.	Unpublished	2007-01-23	~	Solenostemon scutellarioides	from GenBank, corrected	806	0	36	Solenostemon scutellarioides/Lamium amplexicaule/Salvia officinalis parasite C36	~	~	Palmateer et al. (2008)	~
DQ523570	386775	Peronospora sp. UASWS0242	Solenostemon scuttelarioides, Lamiaceae	Belbahri,L., Calmin,G., Holcomb,G. and Lefort,F.	Unpublished	2006-06-26	~	Solenostemon scutellarioides	from GenBank, corrected	806	0	36	Solenostemon scutellarioides/Lamium amplexicaule/Salvia officinalis parasite C36	~	~	Palmateer et al. (2008)	~
DQ523582	386787	Peronospora sp. UASWS0254	Solenostemon scuttelarioides, Lamiaceae	Belbahri,L., Calmin,G., Holcomb,G. and Lefort,F.	Unpublished	2006-06-26	~	Solenostemon scutellarioides	from GenBank, corrected	806	0	36	Solenostemon scutellarioides/Lamium amplexicaule/Salvia officinalis parasite C36	~	~	Palmateer et al. (2008)	~
EF141303	425776	Peronospora sp. C1	Solenostemon scutellarioides	Belbahri,L., Daughtrey,M.L., Calmin,G. and Lefort,F.	Unpublished	2007-02-18	~	Solenostemon scutellarioides	from GenBank	839	0	36	Solenostemon scutellarioides/Lamium amplexicaule/Salvia officinalis parasite C36	~	~	Palmateer et al. (2008)	~
DQ500142	383388	Peronospora sp. isolate 079405,59 (BR)	Stachys palustris	Belbahri,L., Calmin,G., De Kezel,A. and Lefort,F.	Unpublished	2006-05-21	~	Stachys palustris	from GenBank	807	0	36	Solenostemon scutellarioides/Lamium amplexicaule/Salvia officinalis parasite C36	~	~	Palmateer et al. (2008)	A sequence from a historic specimen. May be a contamination.
DQ980194	405749	Peronospora sp. UF0651	UNKNOWN	Harmon,P.F.	Unpublished	2006-12-11	~	UNKNOWN	no reference	831	0	36	Solenostemon scutellarioides/Lamium amplexicaule/Salvia officinalis parasite C36	~	~	Palmateer et al. (2008)	~
DQ500144	383390	Peronospora sp. isolate 079413,67 (BR)	UNKNOWN	Belbahri,L., Calmin,G., De Kezel,A. and Lefort,F.	Unpublished	2006-05-21	~	UNKNOWN	no reference	806	0	36	Solenostemon scutellarioides/Lamium amplexicaule/Salvia officinalis parasite C36	~	~	Palmateer et al. (2008)	~
AF528564	210167	Peronospora corydalis	Corydalis speciosa Max.	Choi,Y.J., Hong,S.B. and Shin,H.D.	Unpublished	2005-01-01	Peronospora corydalis	Corydalis speciosa	from GenBank, adapted	1202	0	37	Corydalis pallida parasite [Pe. corydalis p.p.]	Ib/Ic?	Corydalis solida	Choi et al. (2008)	The correct name of Corydalis speciosa is C. pallida.
AF266783	70743	Peronospora sparsa	UNKNOWN	Cooke,D.E., Drenth,A., Duncan,J.M., Wagels,G. and Brasier,C.M.	Fungal Genet. Biol. 30 (1), 17-32 (2000)	2005-02-24	Peronospora sparsa	Rosa sp.	from publication	799	0	38	Rosa parasite C38 [Pe. sparsa p.p.]	Ia?	Rosa sp. cult.	Gäumann (1923): 296	~
EU391654	70743	Peronospora sparsa	UNKNOWN	Sundelin,T., Collinge,D.B. and Lubeck,M.	Unpublished	2008-02-10	Peronospora sparsa	UNKNOWN	no reference	888	0	38	Rosa parasite C38 [Pe. sparsa p.p.]	Ia?	Rosa sp. cult.	Gäumann (1923): 296	~
DQ500133	383391	Peronospora sp. isolate UASWS0236	Ocimum basilicum	Belbahri,L., Calmin,G., Daughtrey,M. and Lefort,F.	Unpublished	2007-01-23	~	Ocimum basilicum	from GenBank	805	0	39	Ocimum basilicum/Salvia officinalis parasite C39	~	~	Belbahri et al. (2005)	~
EF153667	417821	Peronospora sp. S6	Ocimum basilicum	Calmin,G., Khateri,H., Moarrefzadeh,N., Belbahri,L. and Lefort,F.	Unpublished	2007-01-21	~	Ocimum basilicum	from GenBank	859	0	39	Ocimum basilicum/Salvia officinalis parasite C39	~	~	Belbahri et al. (2005)	~
AY884603	311217	Peronospora sp. UASWS0033	sweet basil (Ocimum basilicum)	Belbahri,L., Calmin,G., Pawlowski,J. and Lefort,F.	Mycol. Res. 109 (PT 11), 1276-1287 (2005)	2006-01-09	~	Ocimum basilicum	from GenBank, corrected	806	1	39	Ocimum basilicum/Salvia officinalis parasite C39	~	~	id.	~
AY884605	311219	Peronospora sp. UASWS0035	sweet basil (Ocimum basilicum)	Belbahri,L., Calmin,G., Pawlowski,J. and Lefort,F.	Mycol. Res. 109 (PT 11), 1276-1287 (2005)	2006-01-09	~	Ocimum basilicum	from GenBank, corrected	806	0	39	Ocimum basilicum/Salvia officinalis parasite C39	~	~	id.	~
AY831720	304779	Peronospora sp. UASWS0008	sweet basil (Ocimum basilicum)	Belbahri,L., Calmin,G., Pawlowski,J. and Lefort,F.	Mycol. Res. 109 (PT 11), 1276-1287 (2005)	2006-01-09	~	Ocimum basilicum	from GenBank, corrected	806	0	39	Ocimum basilicum/Salvia officinalis parasite C39	~	~	id.	~
EF153668	417823	Peronospora sp. S7	Ocimum basilicum	Calmin,G., Khateri,H., Moarrefzadeh,N., Belbahri,L. and Lefort,F.	Unpublished	2007-01-21	~	Ocimum basilicum	from GenBank	856	0	39	Ocimum basilicum/Salvia officinalis parasite C39	~	~	Belbahri et al. (2005)	~
AY831719	304778	Peronospora sp. UASWS0007	sweet basil (Ocimum basilicum)	Belbahri,L., Calmin,G., Pawlowski,J. and Lefort,F.	Mycol. Res. 109 (PT 11), 1276-1287 (2005)	2006-01-09	~	Ocimum basilicum	from GenBank, corrected	806	0	39	Ocimum basilicum/Salvia officinalis parasite C39	~	~	id.	~
AY884606	311224	Peronospora sp. UASWS0036	sweet basil (Ocimum basilicum)	Belbahri,L., Calmin,G., Pawlowski,J. and Lefort,F.	Mycol. Res. 109 (PT 11), 1276-1287 (2005)	2006-01-09	~	Ocimum basilicum	from GenBank, corrected	806	1	39	Ocimum basilicum/Salvia officinalis parasite C39	~	~	id.	~
EF153669	417822	Peronospora sp. S6-2	Ocimum basilicum	Calmin,G., Khateri,H., Moarrefzadeh,N., Belbahri,L. and Lefort,F.	Unpublished	2007-01-21	~	Ocimum basilicum	from GenBank	851	1	39	Ocimum basilicum/Salvia officinalis parasite C39	~	~	Belbahri et al. (2005)	~
EF153670	417824	Peronospora sp. S7-2	Ocimum basilicum	Calmin,G., Khateri,H., Moarrefzadeh,N., Belbahri,L. and Lefort,F.	Unpublished	2007-01-21	~	Ocimum basilicum	from GenBank	857	0	39	Ocimum basilicum/Salvia officinalis parasite C39	~	~	Belbahri et al. (2005)	~
AY919301	315265	Peronospora sp. UASWS0037	Ocimum basilicum	Belbahri,L., Calmin,G., Pawlowski,J. and Lefort,F.	Mycol. Res. 109 (PT 11), 1276-1287 (2005)	2006-01-09	~	Ocimum basilicum	from GenBank	806	0	39	Ocimum basilicum/Salvia officinalis parasite C39	~	~	id.	~
DQ479408	381967	Peronospora sp. AM-2006	UNKNOWN	McLeod,A., Coertze,S. and Mostert,L.	Plant Disease 90, 1115 (2006	2006-06-06	~	Ocimum basilicum	from publication	805	0	39	Ocimum basilicum/Salvia officinalis parasite C39	~	~	Belbahri et al. (2005)	~
AY831721	304781	Peronospora sp. UASWS0009	sweet basil (Ocimum basilicum)	Belbahri,L., Calmin,G., Pawlowski,J. and Lefort,F.	Mycol. Res. 109 (PT 11), 1276-1287 (2005)	2006-01-09	~	Ocimum basilicum	from GenBank, corrected	806	0	39	Ocimum basilicum/Salvia officinalis parasite C39	~	~	id.	~
EF153666	417820	Peronospora sp. S4	Ocimum basilicum	Calmin,G., Khateri,H., Moarrefzadeh,N., Belbahri,L. and Lefort,F.	Unpublished	2007-01-21	~	Ocimum basilicum	from GenBank	854	0	39	Ocimum basilicum/Salvia officinalis parasite C39	~	~	Belbahri et al. (2005)	~
AY831722	304782	Peronospora sp. UASWS0010	Salvia officinalis	Belbahri,L., Calmin,G., Pawlowski,J. and Lefort,F.	Mycol. Res. 109 (PT 11), 1276-1287 (2005)	2006-01-09	~	Salvia officinalis	from GenBank	806	0	39	Ocimum basilicum/Salvia officinalis parasite C39	~	~	id.	~
DQ500143	383389	Peronospora sp. isolate 079409,63 (BR)	Teucrii botryos	Belbahri,L., Calmin,G., De Kezel,A. and Lefort,F.	Unpublished	2006-05-21	~	Teucrium botryoides	from GenBank, corrected	806	0	39	Ocimum basilicum/Salvia officinalis parasite C39	~	~	Belbahri et al. (2005)	A sequence from a historic specimen. May be a contamination.
AY608617	143453	Pseudoperonospora cubensis	Cucumis sativus	Choi,Y.J., Hong,S.B. and Shin,H.D.	Mycol. Res. 109 (PT 7), 841-848 (2005)	2005-11-09	Pseudoperonospora cubensis	Cucumis sativus	from GenBank	802	0	40	Cucumis sativus/Cucurbita mostacha/Humulus japonicus/lupulus/Lagenaria siceraria parasite C40 [Ps. cubensis p.p.]	Ib/Ic?, IIb	Cucurbita pepo	id.	~
AY608616	143453	Pseudoperonospora cubensis	Cucumis sativus	Choi,Y.J., Hong,S.B. and Shin,H.D.	Mycol. Res. 109 (PT 7), 841-848 (2005)	2005-11-09	Pseudoperonospora cubensis	Cucumis sativus	from GenBank	802	0	40	Cucumis sativus/Cucurbita mostacha/Humulus japonicus/lupulus/Lagenaria siceraria parasite C40 [Ps. cubensis p.p.]	Ib/Ic?, IIb	Cucurbita pepo	id.	~
AY608620	143453	Pseudoperonospora cubensis	Cucurbita moschata	Choi,Y.J., Hong,S.B. and Shin,H.D.	Mycol. Res. 109 (PT 7), 841-848 (2005)	2005-11-09	Pseudoperonospora cubensis	Cucurbita moschata	from GenBank	802	0	40	Cucumis sativus/Cucurbita mostacha/Humulus japonicus/lupulus/Lagenaria siceraria parasite C40 [Ps. cubensis p.p.]	Ib/Ic?, IIb	Cucurbita pepo	id.	~
AY608619	143453	Pseudoperonospora cubensis	Cucurbita moschata	Choi,Y.J., Hong,S.B. and Shin,H.D.	Mycol. Res. 109 (PT 7), 841-848 (2005)	2005-11-09	Pseudoperonospora cubensis	Cucurbita moschata	from GenBank	802	0	40	Cucumis sativus/Cucurbita mostacha/Humulus japonicus/lupulus/Lagenaria siceraria parasite C40 [Ps. cubensis p.p.]	Ib/Ic?, IIb	Cucurbita pepo	id.	~
AY608623	162120	Pseudoperonospora humuli	Humulus japonicus	Choi,Y.J., Hong,S.B. and Shin,H.D.	Mycol. Res. 109 (PT 7), 841-848 (2005)	2005-11-09	Pseudoperonospora humuli	Humulus japonicus	from GenBank	802	0	40	Cucumis sativus/Cucurbita mostacha/Humulus japonicus/lupulus/Lagenaria siceraria parasite C40 [Ps. cubensis p.p.]	Ib/Ic?, IIb	Cucurbita pepo	id.	~
AY608622	162120	Pseudoperonospora humuli	Humulus japonicus	Choi,Y.J., Hong,S.B. and Shin,H.D.	Mycol. Res. 109 (PT 7), 841-848 (2005)	2005-11-09	Pseudoperonospora humuli	Humulus japonicus	from GenBank	802	0	40	Cucumis sativus/Cucurbita mostacha/Humulus japonicus/lupulus/Lagenaria siceraria parasite C40 [Ps. cubensis p.p.]	Ib/Ic?, IIb	Cucurbita pepo	id.	~
AY608621	162120	Pseudoperonospora humuli	Humulus japonicus	Choi,Y.J., Hong,S.B. and Shin,H.D.	Mycol. Res. 109 (PT 7), 841-848 (2005)	2005-11-09	Pseudoperonospora humuli	Humulus japonicus	from GenBank	802	1	40	Cucumis sativus/Cucurbita mostacha/Humulus japonicus/lupulus/Lagenaria siceraria parasite C40 [Ps. cubensis p.p.]	Ib/Ic?, IIb	Cucurbita pepo	id.	~
AY608624	162120	Pseudoperonospora humuli	Humulus lupulus	Choi,Y.J., Hong,S.B. and Shin,H.D.	Mycol. Res. 109 (PT 7), 841-848 (2005)	2005-11-09	Pseudoperonospora humuli	Humulus lupulus	from GenBank	802	0	40	Cucumis sativus/Cucurbita mostacha/Humulus japonicus/lupulus/Lagenaria siceraria parasite C40 [Ps. cubensis p.p.]	Ib/Ic?, IIb	Cucurbita pepo	id.	~
DQ409815	143453	Pseudoperonospora cubensis	Lagenaria siceraria	Choi,Y.J. and Shin,H.D.	Plant Pathol. 57 (2), 371 (2008)	2008-04-02	Pseudoperonospora cubensis	Lagenaria siceraria	from GenBank	802	0	40	Cucumis sativus/Cucurbita mostacha/Humulus japonicus/lupulus/Lagenaria siceraria parasite C40 [Ps. cubensis p.p.]	Ib/Ic?, IIb	Cucurbita pepo	id.	~
AY608618	143453	Pseudoperonospora cubensis	Citrullus vulagaris	Choi,Y.J., Hong,S.B. and Shin,H.D.	Mycol. Res. 109 (PT 7), 841-848 (2005)	2005-11-09	Pseudoperonospora cubensis	Citrullus vulgaris	from GenBank, corrected	802	0	41	Citrullus vulgaris/Cucumis melo parasite [Ps. cubensis p.p.]	Ib/Ic?	Cucurbita pepo	id.	~
AY608614	143453	Pseudoperonospora cubensis	Cucumis melo var. makuwa	Choi,Y.J., Hong,S.B. and Shin,H.D.	Mycol. Res. 109 (PT 7), 841-848 (2005)	2005-11-09	Pseudoperonospora cubensis	Cucumis melo var. makuwa	from GenBank	802	0	41	Citrullus vulgaris/Cucumis melo parasite [Ps. cubensis p.p.]	Ib/Ic?	Cucurbita pepo	id.	~
AY608615	143453	Pseudoperonospora cubensis	Cucumis melo var. reticulatus	Choi,Y.J., Hong,S.B. and Shin,H.D.	Mycol. Res. 109 (PT 7), 841-848 (2005)	2005-11-09	Pseudoperonospora cubensis	Cucumis melo var. reticulatus	from GenBank	802	0	41	Citrullus vulgaris/Cucumis melo parasite [Ps. cubensis p.p.]	Ib/Ic?	Cucurbita pepo	id.	~
AY608613	291623	Pseudoperonospora celtidis	Celtis sinensis	Choi,Y.J., Hong,S.B. and Shin,H.D.	Mycol. Res. 109 (PT 7), 841-848 (2005)	2005-11-09	Pseudoperonospora celtidis	Celtis sinensis	from GenBank	801	0	42	Ps. celtidis	~	Celtis occidentalis	id.	~
AY608612	291622	Pseudoperonospora cannabina	Cannabis sativa	Choi,Y.J., Hong,S.B. and Shin,H.D.	Mycol. Res. 109 (PT 7), 841-848 (2005)	2005-11-09	Pseudoperonospora cannabina	Cannabis sativa	from GenBank	800	0	43	Ps. cannabina	~	id.	id.	~
AY608611	291620	Peronospora trigonotidis	Trigonotis peduncularis	Choi,Y.J., Hong,S.B. and Shin,H.D.	Mycol. Res. 109 (PT 7), 841-848 (2005)	2005-11-09	Peronospora trigonotidis	Trigonotis peduncularis	from GenBank	798	0	44	Pe. trigonotidis	~	id.	id.	~
AY608609	291619	Peronospora campestris	Areneria serpyllifolia	Choi,Y.J., Hong,S.B. and Shin,H.D.	Mycol. Res. 109 (PT 7), 841-848 (2005)	2005-11-09	Peronospora campestris	Arenaria serpyllifolia	from GenBank, corrected	798	0	45	Pe. campestris	~	+ Arenaria ciliata	id.	~
AY608608	230379	Peronospora astragalina	Astragalus membranaceus	Choi,Y.J., Hong,S.B. and Shin,H.D.	Mycol. Res. 109 (PT 7), 841-848 (2005)	2005-11-09	Peronospora astragalina	Astragalus membranaceus	from GenBank	805	0	46	Astragalus membranaceus parasite [Pe. astragalina p.p.]	Ia	Astragalus alpinus, A. norvegicus	id.	~
DQ202400	86334	Peronospora manshurica	UNKNOWN	Lai,P.-S., Lien,T.-J., Chen,R.-S. and Tsay,J.-G.	Zhi Wu Bao Hu Xue Hui Hui Kan 46, 155-162 (2004)	2005-10-03	Peronospora manshurica	Glycine max	from publication	888	0	47	Pe. manshurica	~	id.	Gustavsson (1959): 155, Gäumann (1923): 221	~
AY211019	86334	Peronospora manshurica	Glycine soja	Choi,Y.J., Hong,S.B. and Shin,H.D.	Mycol. Res. 107 (Pt 11), 1314-1322 (2003)	2005-11-08	Peronospora manshurica	Glycine soja	from GenBank	1207	2	47	Pe. manshurica	~	Glycine max	Gustavsson (1959): 155, Gäumann (1923): 221	~
AY742740	86334	Peronospora manshurica	UNKNOWN	Zhang,Z., Wang,Y. and Zheng,X.	Submitted (05-SEP-2004) Department of Plant Pathology, Nanjing	2004-10-10	Peronospora manshurica	UNKNOWN	no reference	849	0	47	Pe. manshurica	~	Glycine max	Gustavsson (1959): 155, Gäumann (1923): 221	~
DQ069294	230374	Peronospora sordida	UNKNOWN	Hobden,E.M., Barnes,A. and Lane,C.	Submitted (20-MAY-2005) Mycology, Central Science Laboratory, Sand	2005-07-03	Peronospora sordida	UNKNOWN	no reference	850	0	48	parasite of unknown host C48	Ia/Ib/Ic?	(For Pe. sordida: Scrophularia sp.)	Gäumann (1923): 296	~
EF614966	162102	Peronospora variabilis	Chenopodium album	Choi,Y.J., Denchev,C.M. and Shin,H.D.	Mycopathologia 165 (3), 155-164 (2008)	2008-05-05	Peronospora variabilis	Chenopodium album	from GenBank	796	0	49	Pe. variabilis	IIa	id.	id.	~
EF614968	162102	Peronospora variabilis	Chenopodium album	Choi,Y.J., Denchev,C.M. and Shin,H.D.	Mycopathologia 165 (3), 155-164 (2008)	2008-05-05	Peronospora variabilis	Chenopodium album	from GenBank	796	0	49	Pe. variabilis	IIa	id.	id.	~
EF614967	162102	Peronospora variabilis	Chenopodium album	Choi,Y.J., Denchev,C.M. and Shin,H.D.	Mycopathologia 165 (3), 155-164 (2008)	2008-05-05	Peronospora variabilis	Chenopodium album	from GenBank	796	0	49	Pe. variabilis	IIa	id.	id.	~
AF528556	134698	Peronospora farinosa	Chenopodium album L.	Choi,Y.J., Hong,S.B. and Shin,H.D.	Unpublished	2005-01-01	Peronospora farinosa	Chenopodium album	from GenBank, adapted	1198	0	49	Pe. variabilis	Ia, IIa	id.	Choi et al. (2008)	~
EF614965	162102	Peronospora variabilis	Chenopodium album	Choi,Y.J., Denchev,C.M. and Shin,H.D.	Mycopathologia 165 (3), 155-164 (2008)	2008-05-05	Peronospora variabilis	Chenopodium album	from GenBank	796	0	49	Pe. variabilis	IIa	id.	id.	~
AF465762	134698	Peronospora farinosa	UNKNOWN	Constantinescu,O. and Fatehi,J.	Nova Hedwigia 74 (3-4), 291-338 (2002)	2004-07-30	Peronospora farinosa	Chenopodium album	from publication	796	0	49	Pe. variabilis	Ia, IIa	id.	Choi et al. (2008)	~
AF528557	134698	Peronospora farinosa	Chenopodium album L.	Choi,Y.J., Hong,S.B. and Shin,H.D.	Unpublished	2005-01-01	Peronospora farinosa	Chenopodium album	from GenBank, adapted	1198	0	49	Pe. variabilis	Ia, IIa	id.	Choi et al. (2008)	~
EF614960	162102	Peronospora variabilis	Chenopodium album	Choi,Y.J., Denchev,C.M. and Shin,H.D.	Mycopathologia 165 (3), 155-164 (2008)	2008-05-05	Peronospora variabilis	Chenopodium album	from GenBank	796	0	49	Pe. variabilis	IIa	id.	id.	~
EF614961	162102	Peronospora variabilis	Chenopodium album	Choi,Y.J., Denchev,C.M. and Shin,H.D.	Mycopathologia 165 (3), 155-164 (2008)	2008-05-05	Peronospora variabilis	Chenopodium album	from GenBank	796	0	49	Pe. variabilis	IIa	id.	id.	~
AY211017	134698	Peronospora farinosa	Cenopodium album	Choi,Y.J., Hong,S.B. and Shin,H.D.	Mycol. Res. 107 (Pt 11), 1314-1322 (2003)	2005-11-08	Peronospora farinosa	Chenopodium album	from GenBank, corrected	1198	0	49	Pe. variabilis	Ia, IIa	id.	Choi et al. (2008)	~
EF614963	162102	Peronospora variabilis	Chenopodium album	Choi,Y.J., Denchev,C.M. and Shin,H.D.	Mycopathologia 165 (3), 155-164 (2008)	2008-05-05	Peronospora variabilis	Chenopodium album	from GenBank	796	0	49	Pe. variabilis	IIa	id.	id.	~
EF614962	162102	Peronospora variabilis	Chenopodium album	Choi,Y.J., Denchev,C.M. and Shin,H.D.	Mycopathologia 165 (3), 155-164 (2008)	2008-05-05	Peronospora variabilis	Chenopodium album	from GenBank	796	0	49	Pe. variabilis	IIa	id.	id.	~
EF614959	162102	Peronospora variabilis	Chenopodium album	Choi,Y.J., Denchev,C.M. and Shin,H.D.	Mycopathologia 165 (3), 155-164 (2008)	2008-05-05	Peronospora variabilis	Chenopodium album	from GenBank	796	0	49	Pe. variabilis	IIa	id.	id.	~
EU113303	481876	Peronospora farinosa f. sp. chenopodii	Chenopodium quinoa	Danielsen,S. and Lubeck,M.	Unpublished	2008-09-01	Peronospora farinosa	Chenopodium quinoa	from GenBank	796	0	49	Pe. variabilis	Ia, IIa	Chenopodium album	Choi et al. (2008)	~
EU113305	481876	Peronospora farinosa f. sp. chenopodii	Chenopodium quinoa	Danielsen,S. and Lubeck,M.	Unpublished	2008-09-01	Peronospora farinosa	Chenopodium quinoa	from GenBank	796	0	49	Pe. variabilis	Ia, IIa	Chenopodium album	Choi et al. (2008)	~
EU113306	481876	Peronospora farinosa f. sp. chenopodii	Chenopodium quinoa	Danielsen,S. and Lubeck,M.	Unpublished	2008-09-01	Peronospora farinosa	Chenopodium quinoa	from GenBank	796	0	49	Pe. variabilis	Ia, IIa	Chenopodium album	Choi et al. (2008)	~
EU113309	481876	Peronospora farinosa f. sp. chenopodii	Chenopodium quinoa	Danielsen,S. and Lubeck,M.	Unpublished	2008-09-01	Peronospora farinosa	Chenopodium quinoa	from GenBank	796	0	49	Pe. variabilis	Ia, IIa	Chenopodium album	Choi et al. (2008)	~
EU113310	481876	Peronospora farinosa f. sp. chenopodii	Chenopodium quinoa	Danielsen,S. and Lubeck,M.	Unpublished	2008-09-01	Peronospora farinosa	Chenopodium quinoa	from GenBank	796	0	49	Pe. variabilis	Ia, IIa	Chenopodium album	Choi et al. (2008)	~
EU113304	481876	Peronospora farinosa f. sp. chenopodii	Chenopodium quinoa	Danielsen,S. and Lubeck,M.	Unpublished	2008-09-01	Peronospora farinosa	Chenopodium quinoa	from GenBank	796	0	49	Pe. variabilis	Ia, IIa	Chenopodium album	Choi et al. (2008)	~
EU113307	481876	Peronospora farinosa f. sp. chenopodii	Chenopodium quinoa	Danielsen,S. and Lubeck,M.	Unpublished	2008-09-01	Peronospora farinosa	Chenopodium quinoa	from GenBank	796	0	49	Pe. variabilis	Ia, IIa	Chenopodium album	Choi et al. (2008)	~
EU113308	481876	Peronospora farinosa f. sp. chenopodii	Chenopodium quinoa	Danielsen,S. and Lubeck,M.	Unpublished	2008-09-01	Peronospora farinosa	Chenopodium quinoa	from GenBank	796	0	49	Pe. variabilis	Ia, IIa	Chenopodium album	Choi et al. (2008)	~
AF528558	134698	Peronospora farinosa	Chenopodium ficifolium Smith.	Choi,Y.J., Hong,S.B. and Shin,H.D.	Unpublished	2005-01-01	Peronospora farinosa	Chenopodium ficifolium	from GenBank, adapted	1197	0	50	Pe. bohemica	Ia (Annotation error in AY211018: the correct name for Ch. serotinum is Ch. ficifolium).	id.	Gäumann (1923): 234	~
AY211018	134698	Peronospora farinosa	Cenopodium serotinum	Choi,Y.J., Hong,S.B. and Shin,H.D.	Mycol. Res. 107 (Pt 11), 1314-1322 (2003)	2004-04-14	Peronospora farinosa	Chenopodium serotinum	from GenBank, corrected	1195	0	50	Pe. bohemica	Ia (Annotation error in AY211018: the correct name for Ch. serotinum is Ch. ficifolium).	id.	Gäumann (1923): 234	~
AF528561	210167	Peronospora corydalis	Corydalis ochotensis Turcz.	Choi,Y.J., Hong,S.B. and Shin,H.D.	Unpublished	2005-01-01	Peronospora corydalis	Corydalis ochotensis	from GenBank, adapted	1201	0	51	Corydalis ochotensis/pallida parasite [Pe. corydalis p.p.]	Ib/Ic?	Corydalis solida	Choi et al. (2008)	The type of P. corydalis is from Corydalis solida, for which no sequence is available yet. All accessions of P. corydalis in the tree are from Eastern Asian origins which may or may not represent that species.
AY211015	210167	Peronospora corydalis	Corydalis ocotensis	Choi,Y.J., Hong,S.B. and Shin,H.D.	Mycol. Res. 107 (Pt 11), 1314-1322 (2003)	2005-11-08	Peronospora corydalis	Corydalis ochotensis	from GenBank, corrected	1201	0	51	Corydalis ochotensis/pallida parasite [Pe. corydalis p.p.]	Ib/Ic?	Corydalis solida	Choi et al. (2008)	The type of P. corydalis is from Corydalis solida, for which no sequence is available yet. All accessions of P. corydalis in the tree are from Eastern Asian origins which may or may not represent that species.
AF528562	210167	Peronospora corydalis	Corydalis ochotensis Turcz.	Choi,Y.J., Hong,S.B. and Shin,H.D.	Unpublished	2005-01-01	Peronospora corydalis	Corydalis ochotensis	from GenBank, adapted	1201	0	51	Corydalis ochotensis/pallida parasite [Pe. corydalis p.p.]	Ib/Ic?	Corydalis solida	Choi et al. (2008)	The type of P. corydalis is from Corydalis solida, for which no sequence is available yet. All accessions of P. corydalis in the tree are from Eastern Asian origins which may or may not represent that species.
AY211016	210167	Peronospora corydalis	Corydalis speciosa	Choi,Y.J., Hong,S.B. and Shin,H.D.	Mycol. Res. 107 (Pt 11), 1314-1322 (2003)	2004-04-14	Peronospora corydalis	Corydalis speciosa	from GenBank	1202	0	51	Corydalis ochotensis/pallida parasite [Pe. corydalis p.p.]	Ib/Ic?	Corydalis solida	Choi et al. (2008)	The correct name of Corydalis speciosa is C. pallida.
AF528563	210167	Peronospora corydalis	Corydalis speciosa Max.	Choi,Y.J., Hong,S.B. and Shin,H.D.	Unpublished	2005-01-01	Peronospora corydalis	Corydalis speciosa	from GenBank, adapted	1201	0	51	Corydalis ochotensis/pallida parasite [Pe. corydalis p.p.]	Ib/Ic?	Corydalis solida	Choi et al. (2008)	The correct name of Corydalis speciosa is C. pallida.
EF174889	435249	Peronospora sp. HV48.3F	UNKNOWN	Garcia-Blazquez,G., Goeker,M., Voglmayr,H., Martin,M.P.,	Mycol. Res. 112 (5), 502-512 (2008)	2008-04-28	~	Lathyrus cicera	from publication	874	0	52	Lathyrus cicera/Pisum sativum/Vicia lutea/pannonica/cf. pubescens parasite [Pe. viciae s.l. p.p.]	(IIa)	~	id.	Lathyrus, Pisum and Vicia are very closely related genera that may be impossible to separate.
AY225471	102136	Peronospora viciae	UNKNOWN	Scott,J.B., Hay,F.S. and Wilson,C.R.	Mycol. Res. 108, 198-205 (2004)	2004-03-24	Peronospora viciae	Pisum sativum	from publication, corrected	803	0	52	Lathyrus cicera/Pisum sativum/Vicia lutea/pannonica/cf. pubescens parasite [Pe. viciae s.l. p.p.]	Ia, (IIa)	Vicia sativa (for P. viciae)	García-Blázquez et al. (2008)	Lathyrus, Pisum and Vicia are very closely related genera that may be impossible to separate.
EF174935	435246	Peronospora sp. GG99	UNKNOWN	Garcia-Blazquez,G., Goeker,M., Voglmayr,H., Martin,M.P.,	Mycol. Res. 112 (5), 502-512 (2008)	2008-04-28	~	Vicia cf. pubescens	from publication	816	0	52	Lathyrus cicera/Pisum sativum/Vicia lutea/pannonica/cf. pubescens parasite [Pe. viciae s.l. p.p.]	(IIa)	~	id.	Lathyrus, Pisum and Vicia are very closely related genera that may be impossible to separate.
EF174951	230364	Peronospora mayorii	UNKNOWN	Garcia-Blazquez,G., Goeker,M., Voglmayr,H., Martin,M.P.,	Mycol. Res. 112 (5), 502-512 (2008)	2008-04-28	Peronospora mayorii	Vicia lutea	from publication	804	0	52	Lathyrus cicera/Pisum sativum/Vicia lutea/pannonica/cf. pubescens parasite [Pe. viciae s.l. p.p.]	Ia, (IIa)	+ Vicia cracca, V. sativa ssp. nigra (for P. mayorii)	id.	Lathyrus, Pisum and Vicia are very closely related genera that may be impossible to separate.
EF174952	435252	Peronospora sp. MA-Fungi27993	UNKNOWN	Garcia-Blazquez,G., Goeker,M., Voglmayr,H., Martin,M.P.,	Mycol. Res. 112 (5), 502-512 (2008)	2008-04-28	~	Vicia pannonica	from publication	858	0	52	Lathyrus cicera/Pisum sativum/Vicia lutea/pannonica/cf. pubescens parasite [Pe. viciae s.l. p.p.]	(IIa)	~	id.	Lathyrus, Pisum and Vicia are very closely related genera that may be impossible to separate.
AY225470	70743	Peronospora sparsa	UNKNOWN	Scott,J.B., Hay,F.S. and Wilson,C.R.	Mycol. Res. 108, 198-205 (2004)	2004-03-24	Peronospora sparsa	Rosa sp.	from publication	803	0	53	Rosa parasite C53 [Pe. sparsa p.p.]	Ia?	Rosa sp. cult.	Gäumann (1923): 296	~
AY225469	86335	Peronospora destructor	UNKNOWN	Scott,J.B., Hay,F.S. and Wilson,C.R.	Mycol. Res. 108, 198-205 (2004)	2004-03-24	Peronospora destructor	Allium cepa	from publication	801	0	54	Pe. destructor	~	id.	Gustavsson (1959): 9	~
AY198307	162119	Pseudoperonospora urticae	Urtica dioica	Voglmayr,H.	Mycol. Res. 107 (Pt 10), 1132-1142 (2003)	2004-02-20	Pseudoperonospora urticae	Urtica dioica	from GenBank	801	0	55	Ps. urticae	~	id.	Constantinescu (1991): 92	~
AY198306	143453	Pseudoperonospora cubensis	Cucumis sativa	Voglmayr,H.	Mycol. Res. 107 (Pt 10), 1132-1142 (2003)	2004-02-20	Pseudoperonospora cubensis	Cucumis sativus	from GenBank, corrected	801	0	56	Cucumis sativus parasite C56 [Ps. cubensis p.p.]	Ib/Ic?	Cucurbita pepo	Choi et al. (2005)	~
EU876597	143453	Pseudoperonospora cubensis	UNKNOWN	Sarris,P.F., Adbelhalim,M., Kitner,M., Skandalis,N.,	Unpublished	2008-08-06	Pseudoperonospora cubensis	UNKNOWN	no reference	801	0	56	Cucumis sativus parasite C56 [Ps. cubensis p.p.]	Ib/Ic?	Cucurbita pepo	Choi et al. (2005)	~
AY744946	143453	Pseudoperonospora cubensis	UNKNOWN	Zhang,Z., Wang,Y. and Zheng,X.	Submitted (08-SEP-2004) Department of Plant Pathology, Nanjing	2004-10-10	Pseudoperonospora cubensis	UNKNOWN	no reference	802	0	56	Cucumis sativus parasite C56 [Ps. cubensis p.p.]	Ib/Ic?	Cucurbita pepo	Choi et al. (2005)	~
EU876594	143453	Pseudoperonospora cubensis	UNKNOWN	Sarris,P.F., Adbelhalim,M., Kitner,M., Skandalis,N.,	Unpublished	2008-08-06	Pseudoperonospora cubensis	UNKNOWN	no reference	801	0	56	Cucumis sativus parasite C56 [Ps. cubensis p.p.]	Ib/Ic?	Cucurbita pepo	Choi et al. (2005)	~
EU876604	143453	Pseudoperonospora cubensis	UNKNOWN	Sarris,P.F., Adbelhalim,M., Kitner,M., Skandalis,N.,	Unpublished	2008-08-06	Pseudoperonospora cubensis	UNKNOWN	no reference	801	0	56	Cucumis sativus parasite C56 [Ps. cubensis p.p.]	Ib/Ic?	Cucurbita pepo	Choi et al. (2005)	~
EU876601	143453	Pseudoperonospora cubensis	UNKNOWN	Sarris,P.F., Adbelhalim,M., Kitner,M., Skandalis,N.,	Unpublished	2008-08-06	Pseudoperonospora cubensis	UNKNOWN	no reference	801	0	56	Cucumis sativus parasite C56 [Ps. cubensis p.p.]	Ib/Ic?	Cucurbita pepo	Choi et al. (2005)	~
EU876600	143453	Pseudoperonospora cubensis	UNKNOWN	Sarris,P.F., Adbelhalim,M., Kitner,M., Skandalis,N.,	Unpublished	2008-08-06	Pseudoperonospora cubensis	UNKNOWN	no reference	801	0	56	Cucumis sativus parasite C56 [Ps. cubensis p.p.]	Ib/Ic?	Cucurbita pepo	Choi et al. (2005)	~
EU876599	143453	Pseudoperonospora cubensis	UNKNOWN	Sarris,P.F., Adbelhalim,M., Kitner,M., Skandalis,N.,	Unpublished	2008-08-06	Pseudoperonospora cubensis	UNKNOWN	no reference	801	0	56	Cucumis sativus parasite C56 [Ps. cubensis p.p.]	Ib/Ic?	Cucurbita pepo	Choi et al. (2005)	~
EU876586	143453	Pseudoperonospora cubensis	UNKNOWN	Sarris,P.F., Adbelhalim,M., Kitner,M., Skandalis,N.,	Unpublished	2008-08-06	Pseudoperonospora cubensis	UNKNOWN	no reference	801	0	56	Cucumis sativus parasite C56 [Ps. cubensis p.p.]	Ib/Ic?	Cucurbita pepo	Choi et al. (2005)	~
EU876598	143453	Pseudoperonospora cubensis	UNKNOWN	Sarris,P.F., Adbelhalim,M., Kitner,M., Skandalis,N.,	Unpublished	2008-08-06	Pseudoperonospora cubensis	UNKNOWN	no reference	801	0	56	Cucumis sativus parasite C56 [Ps. cubensis p.p.]	Ib/Ic?	Cucurbita pepo	Choi et al. (2005)	~
EU876588	143453	Pseudoperonospora cubensis	UNKNOWN	Sarris,P.F., Adbelhalim,M., Kitner,M., Skandalis,N.,	Unpublished	2008-08-06	Pseudoperonospora cubensis	UNKNOWN	no reference	801	0	56	Cucumis sativus parasite C56 [Ps. cubensis p.p.]	Ib/Ic?	Cucurbita pepo	Choi et al. (2005)	~
EU876587	143453	Pseudoperonospora cubensis	UNKNOWN	Sarris,P.F., Adbelhalim,M., Kitner,M., Skandalis,N.,	Unpublished	2008-08-06	Pseudoperonospora cubensis	UNKNOWN	no reference	801	0	56	Cucumis sativus parasite C56 [Ps. cubensis p.p.]	Ib/Ic?	Cucurbita pepo	Choi et al. (2005)	~
EU876589	143453	Pseudoperonospora cubensis	UNKNOWN	Sarris,P.F., Adbelhalim,M., Kitner,M., Skandalis,N.,	Unpublished	2008-08-06	Pseudoperonospora cubensis	UNKNOWN	no reference	801	0	56	Cucumis sativus parasite C56 [Ps. cubensis p.p.]	Ib/Ic?	Cucurbita pepo	Choi et al. (2005)	~
EU876593	143453	Pseudoperonospora cubensis	UNKNOWN	Sarris,P.F., Adbelhalim,M., Kitner,M., Skandalis,N.,	Unpublished	2008-08-06	Pseudoperonospora cubensis	UNKNOWN	no reference	801	0	56	Cucumis sativus parasite C56 [Ps. cubensis p.p.]	Ib/Ic?	Cucurbita pepo	Choi et al. (2005)	~
EU876595	143453	Pseudoperonospora cubensis	UNKNOWN	Sarris,P.F., Adbelhalim,M., Kitner,M., Skandalis,N.,	Unpublished	2008-08-06	Pseudoperonospora cubensis	UNKNOWN	no reference	801	0	56	Cucumis sativus parasite C56 [Ps. cubensis p.p.]	Ib/Ic?	Cucurbita pepo	Choi et al. (2005)	~
EU876591	143453	Pseudoperonospora cubensis	UNKNOWN	Sarris,P.F., Adbelhalim,M., Kitner,M., Skandalis,N.,	Unpublished	2008-08-06	Pseudoperonospora cubensis	UNKNOWN	no reference	801	0	56	Cucumis sativus parasite C56 [Ps. cubensis p.p.]	Ib/Ic?	Cucurbita pepo	Choi et al. (2005)	~
EU876592	143453	Pseudoperonospora cubensis	UNKNOWN	Sarris,P.F., Adbelhalim,M., Kitner,M., Skandalis,N.,	Unpublished	2008-08-06	Pseudoperonospora cubensis	UNKNOWN	no reference	801	0	56	Cucumis sativus parasite C56 [Ps. cubensis p.p.]	Ib/Ic?	Cucurbita pepo	Choi et al. (2005)	~
EU876596	143453	Pseudoperonospora cubensis	UNKNOWN	Sarris,P.F., Adbelhalim,M., Kitner,M., Skandalis,N.,	Unpublished	2008-08-06	Pseudoperonospora cubensis	UNKNOWN	no reference	801	0	56	Cucumis sativus parasite C56 [Ps. cubensis p.p.]	Ib/Ic?	Cucurbita pepo	Choi et al. (2005)	~
EU876603	143453	Pseudoperonospora cubensis	UNKNOWN	Sarris,P.F., Adbelhalim,M., Kitner,M., Skandalis,N.,	Unpublished	2008-08-06	Pseudoperonospora cubensis	UNKNOWN	no reference	801	0	56	Cucumis sativus parasite C56 [Ps. cubensis p.p.]	Ib/Ic?	Cucurbita pepo	Choi et al. (2005)	~
EU876584	143453	Pseudoperonospora cubensis	UNKNOWN	Sarris,P.F., Adbelhalim,M., Kitner,M., Skandalis,N.,	Unpublished	2008-08-06	Pseudoperonospora cubensis	UNKNOWN	no reference	801	0	56	Cucumis sativus parasite C56 [Ps. cubensis p.p.]	Ib/Ic?	Cucurbita pepo	Choi et al. (2005)	~
AY198304	162120	Pseudoperonospora humuli	Humulus lupulus	Voglmayr,H.	Mycol. Res. 107 (Pt 10), 1132-1142 (2003)	2004-02-20	Pseudoperonospora humuli	Humulus lupulus	from GenBank	802	0	57	Humulus lupulus/Rhododendron parasite C57 [Ps. cubensis p.p.]	Ib/Ic?	Cucurbita pepo	Choi et al. (2005)	~
AY198305	162120	Pseudoperonospora humuli	Humulus lupulus	Voglmayr,H.	Mycol. Res. 107 (Pt 10), 1132-1142 (2003)	2004-02-20	Pseudoperonospora humuli	Humulus lupulus	from GenBank	802	0	57	Humulus lupulus/Rhododendron parasite C57 [Ps. cubensis p.p.]	Ib/Ic?	Cucurbita pepo	Choi et al. (2005)	~
EF126356	162120	Pseudoperonospora humuli	Rhododendron sp.	Belbahri,L., Oszako,T., Calmin,G. and Lefort,F.	Unpublished	2006-12-20	Pseudoperonospora humuli	Rhododendron sp.	from GenBank	802	0	57	Humulus lupulus/Rhododendron parasite C57 [Ps. cubensis p.p.]	Ib/Ic?	Cucurbita pepo	Choi et al. (2005)	~
AY198303	230449	Peronospora alchemillae	Alchemilla vulgaris agg.	Voglmayr,H.	Mycol. Res. 107 (Pt 10), 1132-1142 (2003)	2004-02-20	Peronospora alchemillae	Alchemilla vulgaris agg.	from GenBank	797	0	58	Pe. alchemillae	(IIa)	Alchemilla xanthochlora	Gustavsson (1959): 123, Gäumann (1923): 289	~
AY608610	70743	Peronospora sparsa	Rosa multiflora	Choi,Y.J., Hong,S.B. and Shin,H.D.	Mycol. Res. 109 (PT 7), 841-848 (2005)	2005-11-09	Peronospora sparsa	Rosa multiflora	from GenBank	797	0	58	Pe. alchemillae	Ia, (IIa)	Alchemilla xanthochlora	Gustavsson (1959): 123, Gäumann (1923): 289	~
AY198302	230448	Peronospora knautiae	Scabiosa columbaria	Voglmayr,H.	Mycol. Res. 107 (Pt 10), 1132-1142 (2003)	2004-02-20	Peronospora knautiae	Scabiosa columbaria	from GenBank	801	0	59	Pe. knautiae	~	Knautia sp., K. arvensis, Scabiosa cf. Ochroleuca	Gustavsson (1959): 205, Gäumann (1923): 238	~
AY198301	230447	Peronospora sherardiae	Sherardia arvensis	Voglmayr,H.	Mycol. Res. 107 (Pt 10), 1132-1142 (2003)	2004-02-20	Peronospora sherardiae	Sherardia arvensis	from GenBank	796	0	60	Pe. sherardiae	~	id.	Gustavsson (1959): 197, Gäumann (1923): 249	~
AY198300	162109	Peronospora aparines	Galium aparine	Voglmayr,H.	Mycol. Res. 107 (Pt 10), 1132-1142 (2003)	2004-02-20	Peronospora aparines	Galium aparine	from GenBank	797	0	61	Pe. aparines	~	id.	Gustavsson (1959): 201, Gäumann (1923): 246	~
AY198298	162108	Peronospora calotheca	Galium odoratum	Voglmayr,H.	Mycol. Res. 107 (Pt 10), 1132-1142 (2003)	2004-02-20	Peronospora calotheca	Galium odoratum	from GenBank	796	0	62	Pe. calotheca	IIa	id.	Gustavsson (1959): 198	The name „P. calotheca“ has been published before „P. sylvatica“.
AY198299	230446	Peronospora silvatica	Galium sylvaticum	Voglmayr,H.	Mycol. Res. 107 (Pt 10), 1132-1142 (2003)	2004-02-20	Peronospora silvatica	Galium sylvaticum	from GenBank	796	0	62	Pe. calotheca	IIa	Galium odoratum	Gustavsson (1959): 198	The name „P. calotheca“ has been published before „P. sylvatica“.
AY198297	162110	Peronospora violacea	Knautia arvensis	Voglmayr,H.	Mycol. Res. 107 (Pt 10), 1132-1142 (2003)	2004-02-20	Peronospora violacea	Knautia arvensis	from GenBank	801	0	63	Pe. violacea	~	id.	Gustavsson (1959): 206, Gäumann (1923): 239	~
AY198296	230445	Peronospora radii	Anthemis austriaca	Voglmayr,H.	Mycol. Res. 107 (Pt 10), 1132-1142 (2003)	2004-02-20	Peronospora radii	Anthemis austriaca	from GenBank	799	0	64	Pe. radii	~	Matricaria perforata	Gustavsson (1959): 213, Gäumann (1923): 125	~
AY198295	230444	Peronospora stigmaticola	Mentha longifolia	Voglmayr,H.	Mycol. Res. 107 (Pt 10), 1132-1142 (2003)	2004-02-20	Peronospora stigmaticola	Mentha longifolia	from GenBank	799	0	65	Pe. stigmaticola	~	Mentha aquatica	Gustavsson (1959): 179, Gäumann (1923): 140	~
AY198294	230443	Peronospora tranzscheliana	Melampyrum pratense	Voglmayr,H.	Mycol. Res. 107 (Pt 10), 1132-1142 (2003)	2004-02-20	Peronospora tranzscheliana	Melampyrum pratense	from GenBank	799	0	66	Pe. tranzscheliana	~	id.	Constantinescu (1991): 88	~
AY198293	230442	Peronospora valerianellae	Valerianella carinata	Voglmayr,H.	Mycol. Res. 107 (Pt 10), 1132-1142 (2003)	2004-02-20	Peronospora valerianellae	Valerianella carinata	from GenBank	798	0	67	Pe. valerianellae	~	id.	Gustavsson (1959): 203, Gäumann (1923): 316	~
AF465761	184466	Peronospora arborescens	UNKNOWN	Constantinescu,O. and Fatehi,J.	Nova Hedwigia 74 (3-4), 291-338 (2002)	2004-07-30	Peronospora arborescens	Papaver rhoeas	from publication	801	0	68	Pe. arborescens	~	id.	Gustavsson (1959): 70	~
AY198292	184466	Peronospora arborescens	Papaver rhoeas	Voglmayr,H.	Mycol. Res. 107 (Pt 10), 1132-1142 (2003)	2004-02-20	Peronospora arborescens	Papaver rhoeas	from GenBank	801	0	68	Pe. arborescens	~	id.	Gustavsson (1959): 70	~
DQ885376	184466	Peronospora arborescens	Papaver somniferum	Landa,B.B., Montes-Borrego,M., Munoz-Ledesma,F.J. and	Unpublished	2007-10-21	Peronospora arborescens	Papaver somniferum	from GenBank	801	0	68	Pe. arborescens	~	Papaver rhoeas	Gustavsson (1959): 70, Landa et al. (2007)	~
DQ885380	184466	Peronospora arborescens	Papaver somniferum	Landa,B.B., Montes-Borrego,M., Munoz-Ledesma,F.J. and	Unpublished	2007-10-21	Peronospora arborescens	Papaver somniferum	from GenBank	801	0	68	Pe. arborescens	~	Papaver rhoeas	Gustavsson (1959): 70, Landa et al. (2007)	~
DQ885362	184466	Peronospora arborescens	Papaver somniferum	Landa,B.B., Montes-Borrego,M., Munoz-Ledesma,F.J. and	Unpublished	2007-10-21	Peronospora arborescens	Papaver somniferum	from GenBank	801	0	68	Pe. arborescens	~	Papaver rhoeas	Gustavsson (1959): 70, Landa et al. (2007)	~
EU295529	184466	Peronospora arborescens	Papaver somniferum	Landa,B.B., Montes-Borrego,M. and Jimenez-Diaz,R.M.	Unpublished	2007-12-13	Peronospora arborescens	Papaver somniferum	from GenBank	930	0	68	Pe. arborescens	~	Papaver rhoeas	Gustavsson (1959): 70, Landa et al. (2007)	~
DQ885363	184466	Peronospora arborescens	Papaver somniferum	Landa,B.B., Montes-Borrego,M., Munoz-Ledesma,F.J. and	Unpublished	2007-10-21	Peronospora arborescens	Papaver somniferum	from GenBank	801	0	68	Pe. arborescens	~	Papaver rhoeas	Gustavsson (1959): 70, Landa et al. (2007)	~
DQ885372	184466	Peronospora arborescens	Papaver somniferum	Landa,B.B., Montes-Borrego,M., Munoz-Ledesma,F.J. and	Unpublished	2007-10-21	Peronospora arborescens	Papaver somniferum	from GenBank	801	0	68	Pe. arborescens	~	Papaver rhoeas	Gustavsson (1959): 70, Landa et al. (2007)	~
DQ885366	184466	Peronospora arborescens	Papaver somniferum	Landa,B.B., Montes-Borrego,M., Munoz-Ledesma,F.J. and	Unpublished	2007-10-21	Peronospora arborescens	Papaver somniferum	from GenBank	801	0	68	Pe. arborescens	~	Papaver rhoeas	Gustavsson (1959): 70, Landa et al. (2007)	~
DQ885384	184466	Peronospora arborescens	Papaver somniferum	Landa,B.B., Montes-Borrego,M., Munoz-Ledesma,F.J. and	Unpublished	2007-10-21	Peronospora arborescens	Papaver somniferum	from GenBank	790	0	68	Pe. arborescens	~	Papaver rhoeas	Gustavsson (1959): 70, Landa et al. (2007)	~
DQ885383	184466	Peronospora arborescens	Papaver somniferum	Landa,B.B., Montes-Borrego,M., Munoz-Ledesma,F.J. and	Unpublished	2007-10-21	Peronospora arborescens	Papaver somniferum	from GenBank	801	0	68	Pe. arborescens	~	Papaver rhoeas	Gustavsson (1959): 70, Landa et al. (2007)	~
DQ885371	184466	Peronospora arborescens	Papaver somniferum	Landa,B.B., Montes-Borrego,M., Munoz-Ledesma,F.J. and	Unpublished	2007-10-21	Peronospora arborescens	Papaver somniferum	from GenBank	801	0	68	Pe. arborescens	~	Papaver rhoeas	Gustavsson (1959): 70, Landa et al. (2007)	~
DQ886487	184466	Peronospora arborescens	Papaver somniferum	Landa,B.B., Montes-Borrego,M., Munoz-Ledesma,F.J. and	Unpublished	2007-09-01	Peronospora arborescens	Papaver somniferum	from GenBank	801	0	68	Pe. arborescens	~	Papaver rhoeas	Gustavsson (1959): 70, Landa et al. (2007)	~
DQ885379	184466	Peronospora arborescens	Papaver somniferum	Landa,B.B., Montes-Borrego,M., Munoz-Ledesma,F.J. and	Unpublished	2007-10-21	Peronospora arborescens	Papaver somniferum	from GenBank	801	0	68	Pe. arborescens	~	Papaver rhoeas	Gustavsson (1959): 70, Landa et al. (2007)	~
DQ885378	184466	Peronospora arborescens	Papaver somniferum	Landa,B.B., Montes-Borrego,M., Munoz-Ledesma,F.J. and	Unpublished	2007-10-21	Peronospora arborescens	Papaver somniferum	from GenBank	801	0	68	Pe. arborescens	~	Papaver rhoeas	Gustavsson (1959): 70, Landa et al. (2007)	~
DQ885382	184466	Peronospora arborescens	Papaver somniferum	Landa,B.B., Montes-Borrego,M., Munoz-Ledesma,F.J. and	Unpublished	2007-10-21	Peronospora arborescens	Papaver somniferum	from GenBank	801	0	68	Pe. arborescens	~	Papaver rhoeas	Gustavsson (1959): 70, Landa et al. (2007)	~
DQ885381	184466	Peronospora arborescens	Papaver somniferum	Landa,B.B., Montes-Borrego,M., Munoz-Ledesma,F.J. and	Unpublished	2007-10-21	Peronospora arborescens	Papaver somniferum	from GenBank	801	0	68	Pe. arborescens	~	Papaver rhoeas	Gustavsson (1959): 70, Landa et al. (2007)	~
DQ885373	184466	Peronospora arborescens	Papaver somniferum	Landa,B.B., Montes-Borrego,M., Munoz-Ledesma,F.J. and	Unpublished	2007-10-21	Peronospora arborescens	Papaver somniferum	from GenBank	801	0	68	Pe. arborescens	~	Papaver rhoeas	Gustavsson (1959): 70, Landa et al. (2007)	~
DQ885377	184466	Peronospora arborescens	Papaver somniferum	Landa,B.B., Montes-Borrego,M., Munoz-Ledesma,F.J. and	Unpublished	2007-10-21	Peronospora arborescens	Papaver somniferum	from GenBank	801	0	68	Pe. arborescens	~	Papaver rhoeas	Gustavsson (1959): 70, Landa et al. (2007)	~
DQ885365	184466	Peronospora arborescens	Papaver somniferum	Landa,B.B., Montes-Borrego,M., Munoz-Ledesma,F.J. and	Unpublished	2007-10-21	Peronospora arborescens	Papaver somniferum	from GenBank	801	0	68	Pe. arborescens	~	Papaver rhoeas	Gustavsson (1959): 70, Landa et al. (2007)	~
DQ885361DQ886488	184466	Peronospora arborescens	Papaver somniferum	Landa,B.B., Montes-Borrego,M., Munoz-Ledesma,F.J. and	Unpublished	2007-10-21	Peronospora arborescens	Papaver somniferum	from GenBank	801	0	68	Pe. arborescens	~	Papaver rhoeas	Gustavsson (1959): 70, Landa et al. (2007)	~
DQ885364	184466	Peronospora arborescens	Papaver somniferum	Landa,B.B., Montes-Borrego,M., Munoz-Ledesma,F.J. and	Unpublished	2007-10-21	Peronospora arborescens	Papaver somniferum	from GenBank	801	0	68	Pe. arborescens	~	Papaver rhoeas	Gustavsson (1959): 70, Landa et al. (2007)	~
DQ885369	184466	Peronospora arborescens	Papaver somniferum	Landa,B.B., Montes-Borrego,M., Munoz-Ledesma,F.J. and	Unpublished	2007-10-21	Peronospora arborescens	Papaver somniferum	from GenBank	801	0	68	Pe. arborescens	~	Papaver rhoeas	Gustavsson (1959): 70, Landa et al. (2007)	~
DQ885368	184466	Peronospora arborescens	Papaver somniferum	Landa,B.B., Montes-Borrego,M., Munoz-Ledesma,F.J. and	Unpublished	2007-10-21	Peronospora arborescens	Papaver somniferum	from GenBank	801	0	68	Pe. arborescens	~	Papaver rhoeas	Gustavsson (1959): 70, Landa et al. (2007)	~
DQ885370	184466	Peronospora arborescens	Papaver somniferum	Landa,B.B., Montes-Borrego,M., Munoz-Ledesma,F.J. and	Unpublished	2007-10-21	Peronospora arborescens	Papaver somniferum	from GenBank	801	0	68	Pe. arborescens	~	Papaver rhoeas	Gustavsson (1959): 70, Landa et al. (2007)	~
DQ885367	184466	Peronospora arborescens	Papaver somniferum	Landa,B.B., Montes-Borrego,M., Munoz-Ledesma,F.J. and	Unpublished	2007-10-21	Peronospora arborescens	Papaver somniferum	from GenBank	801	0	68	Pe. arborescens	~	Papaver rhoeas	Gustavsson (1959): 70, Landa et al. (2007)	~
AY695807	184466	Peronospora arborescens	UNKNOWN	Landa,B.B., Montes-Borrego,M., Munoz-Ledesma,F.J. and	Unpublished	2005-12-07	Peronospora arborescens	UNKNOWN	no reference	1221	0	68	Pe. arborescens	~	Papaver rhoeas	Gustavsson (1959): 70, Landa et al. (2007)	~
AY695806	184466	Peronospora arborescens	UNKNOWN	Landa,B.B., Montes-Borrego,M., Munoz-Ledesma,F.J. and	Unpublished	2005-12-07	Peronospora arborescens	UNKNOWN	no reference	1221	0	68	Pe. arborescens	~	Papaver rhoeas	Gustavsson (1959): 70, Landa et al. (2007)	~
AY695805	184466	Peronospora arborescens	UNKNOWN	Landa,B.B., Montes-Borrego,M., Munoz-Ledesma,F.J. and	Unpublished	2005-12-07	Peronospora arborescens	UNKNOWN	no reference	848	0	68	Pe. arborescens	~	Papaver rhoeas	Gustavsson (1959): 70, Landa et al. (2007)	~
AY695804	184466	Peronospora arborescens	UNKNOWN	Landa,B.B., Montes-Borrego,M., Munoz-Ledesma,F.J. and	Unpublished	2005-12-07	Peronospora arborescens	UNKNOWN	no reference	848	0	68	Pe. arborescens	~	Papaver rhoeas	Gustavsson (1959): 70, Landa et al. (2007)	~
AY198291	230441	Peronospora chenopodii-polyspermi	Chenopodium polyspermum	Voglmayr,H.	Mycol. Res. 107 (Pt 10), 1132-1142 (2003)	2004-02-20	Peronospora chenopodii-polyspermi	Chenopodium polyspermum	from GenBank	797	0	69	Pe. chenopodii-polyspermi	~	id.	Choi et al. (2008)	~
EF614956	230441	Peronospora chenopodii-polyspermi	Chenopodium polyspermum	Choi,Y.J., Denchev,C.M. and Shin,H.D.	Mycopathologia 165 (3), 155-164 (2008)	2008-05-05	Peronospora chenopodii-polyspermi	Chenopodium polyspermum	from GenBank	798	0	69	Pe. chenopodii-polyspermi	~	id.	id.	~
AY198290	230440	Peronospora kochiae-scopariae	Bassia scoparia	Voglmayr,H.	Mycol. Res. 107 (Pt 10), 1132-1142 (2003)	2004-02-20	Peronospora kochiae-scopariae	Bassia scoparia	from GenBank	800	0	70	Pe. kochiae-scopariae	Annotation error in DQ643845: host is Bassia scoparia (see Choi et al. 2007)	id.	Kochman & Majewski (1970): 127	~
DQ643845	542832	Peronospora effusa	Spinacia oleracea	Choi,Y.J., Hong,S.B. and Shin,H.D.	Mycol. Res. 111 (PT 4), 381-391 (2007)	2008-06-19	Peronospora effusa	Spinacia oleracea	from GenBank	801	0	70	Pe. kochiae-scopariae	Annotation error in DQ643845: host is Bassia scoparia (see Choi et al. 2007)	id.	Kochman & Majewski (1970): 127	~
AY198289	230439	Peronospora tabacina	Nicotiana alata	Voglmayr,H.	Mycol. Res. 107 (Pt 10), 1132-1142 (2003)	2004-02-20	Peronospora tabacina	Nicotiana alata	from GenBank	794	0	71	Pe. tabacina	~	Nicotiana suaveolens, N. tabacum	Kochman & Majewski (1970): 245	~
DQ067896	230439	Peronospora tabacina	UNKNOWN	Johnson,A., Blanco-Meneses,M., Liu,B. and Ristaino,J.B.	Unpublished	2006-04-19	Peronospora tabacina	UNKNOWN	no reference	905	0	71	Pe. tabacina	~	Nicotiana suaveolens, N. tabacum	Kochman & Majewski (1970): 245	~
DQ067897	230439	Peronospora tabacina	UNKNOWN	Johnson,A., Blanco-Meneses,M., Liu,B. and Ristaino,J.B.	Unpublished	2006-04-19	Peronospora tabacina	UNKNOWN	no reference	904	0	71	Pe. tabacina	~	Nicotiana suaveolens, N. tabacum	Kochman & Majewski (1970): 245	~
DQ067898	230439	Peronospora tabacina	UNKNOWN	Johnson,A., Blanco-Meneses,M., Liu,B. and Ristaino,J.B.	Unpublished	2006-04-19	Peronospora tabacina	UNKNOWN	no reference	858	20	71	Pe. tabacina	~	Nicotiana suaveolens, N. tabacum	Kochman & Majewski (1970): 245	See comment to DQ665672.
DQ643843	134698	Peronospora farinosa	Beta vulgaris	Choi,Y.J., Hong,S.B. and Shin,H.D.	Mycol. Res. 111 (PT 4), 381-391 (2007)	2008-06-19	Peronospora farinosa	Beta vulgaris	from GenBank	796	0	72	Beta vulgaris/Rumex acetosa/Spergula arvensis parasite [Pe. schachtii == P. obovata == P. rumicis p.p.]	Ia, IIb	Beta vulgaris (for Pe. schachtii)	id.	A hard to interpret cluster. The biology and the seasonal occurrence of the Rumex and Spergula parasites are rather different.
DQ643844	134698	Peronospora farinosa	Beta vulgaris	Choi,Y.J., Hong,S.B. and Shin,H.D.	Mycol. Res. 111 (PT 4), 381-391 (2007)	2008-06-19	Peronospora farinosa	Beta vulgaris	from GenBank	796	0	72	Beta vulgaris/Rumex acetosa/Spergula arvensis parasite [Pe. schachtii == P. obovata == P. rumicis p.p.]	IIb	Beta vulgaris (for Pe. schachtii)	id.	A hard to interpret cluster. The biology and the seasonal occurrence of the Rumex and Spergula parasites are rather different.
DQ364471	369826	Peronospora sp. UASWS0196	Beta vulgaris	Belbahri,L., Calmin,G. and Lefort,F.	Unpublished	2006-02-08	~	Beta vulgaris	from GenBank	798	0	72	Beta vulgaris/Rumex acetosa/Spergula arvensis parasite [Pe. schachtii == P. obovata == P. rumicis p.p.]	Ia, IIb	~	Choi et al. (2007)	A hard to interpret cluster. The biology and the seasonal occurrence of the Rumex and Spergula parasites are rather different.
DQ643903	162101	Peronospora rumicis	Rumex acetosa	Choi,Y.J., Hong,S.B. and Shin,H.D.	Mycol. Res. 111 (PT 4), 381-391 (2007)	2008-06-19	Peronospora rumicis	Rumex acetosa	from GenBank	798	0	72	Beta vulgaris/Rumex acetosa/Spergula arvensis parasite [Pe. schachtii == P. obovata == P. rumicis p.p.]	IIb	Rumex acetosella (for Pe. rumicis)	id.	A hard to interpret cluster. The biology and the seasonal occurrence of the Rumex and Spergula parasites are rather different.
DQ069296	162101	Peronospora rumicis	Rumex acetosa	Hobden,E.M. and Beales,P.	Submitted (20-MAY-2005) Mycology, Central Science Laboratory, Sand	2005-07-03	Peronospora rumicis	Rumex acetosa	from GenBank	846	0	72	Beta vulgaris/Rumex acetosa/Spergula arvensis parasite [Pe. schachtii == P. obovata == P. rumicis p.p.]	IIb	Rumex acetosella (for Pe. rumicis)	Constantinescu & Fatehi (2002)	A hard to interpret cluster. The biology and the seasonal occurrence of the Rumex and Spergula parasites are rather different.
AY198287	162101	Peronospora rumicis	Rumex acetosa	Voglmayr,H.	Mycol. Res. 107 (Pt 10), 1132-1142 (2003)	2004-02-20	Peronospora rumicis	Rumex acetosa	from GenBank	798	0	72	Beta vulgaris/Rumex acetosa/Spergula arvensis parasite [Pe. schachtii == P. obovata == P. rumicis p.p.]	IIb	Rumex acetosella (for Pe. rumicis)	Constantinescu & Fatehi (2002)	A hard to interpret cluster. The biology and the seasonal occurrence of the Rumex and Spergula parasites are rather different.
AF465758	162101	Peronospora rumicis	UNKNOWN	Constantinescu,O. and Fatehi,J.	Nova Hedwigia 74 (3-4), 291-338 (2002)	2004-07-30	Peronospora rumicis	Rumex acetosa	from publication	798	0	72	Beta vulgaris/Rumex acetosa/Spergula arvensis parasite [Pe. schachtii == P. obovata == P. rumicis p.p.]	IIb	Rumex acetosella (for Pe. rumicis)	id.	A hard to interpret cluster. The biology and the seasonal occurrence of the Rumex and Spergula parasites are rather different.
AY198288	230438	Peronospora obovata	Spergula arvensis	Voglmayr,H.	Mycol. Res. 107 (Pt 10), 1132-1142 (2003)	2004-02-20	Peronospora obovata	Spergula arvensis	from GenBank	798	0	72	Beta vulgaris/Rumex acetosa/Spergula arvensis parasite [Pe. schachtii == P. obovata == P. rumicis p.p.]	IIb	Spergula arvensis (for Pe. obovata)	Gustavsson (1959): 51	A hard to interpret cluster. The biology and the seasonal occurrence of the Rumex and Spergula parasites are rather different.
AY198286	162100	Peronospora boni-henrici	Chenopodium bonus-henricus	Voglmayr,H.	Mycol. Res. 107 (Pt 10), 1132-1142 (2003)	2004-02-20	Peronospora boni-henrici	Chenopodium bonus-henricus	from GenBank	796	0	73	Pe. boni-henrici	~	id.	Choi et al. (2008)	~
EF614952	162100	Peronospora boni-henrici	Chenopodium bonus-henricus	Choi,Y.J., Denchev,C.M. and Shin,H.D.	Mycopathologia 165 (3), 155-164 (2008)	2008-05-05	Peronospora boni-henrici	Chenopodium bonus-henricus	from GenBank	796	0	73	Pe. boni-henrici	~	id.	id.	~
EF614954	162100	Peronospora boni-henrici	Chenopodium bonus-henricus	Choi,Y.J., Denchev,C.M. and Shin,H.D.	Mycopathologia 165 (3), 155-164 (2008)	2008-05-05	Peronospora boni-henrici	Chenopodium bonus-henricus	from GenBank	796	1	73	Pe. boni-henrici	~	id.	id.	~
EF614953	162100	Peronospora boni-henrici	Chenopodium bonus-henricus	Choi,Y.J., Denchev,C.M. and Shin,H.D.	Mycopathologia 165 (3), 155-164 (2008)	2008-05-05	Peronospora boni-henrici	Chenopodium bonus-henricus	from GenBank	796	0	73	Pe. boni-henrici	~	id.	id.	~
AY198285	481876	Peronospora farinosa f. sp. chenopodii	Chenopodium album	Voglmayr,H.	Mycol. Res. 107 (Pt 10), 1132-1142 (2003)	2004-02-20	Peronospora farinosa	Chenopodium album	from GenBank	796	0	74	Chenopodium strictum parasite C74	Ia	~	Choi et al. (2008)	Annotation error in AY198285: the host is Chenopodium strictum.
AY198284	230436	Peronospora arthurii	Oenothera biennis agg.	Voglmayr,H.	Mycol. Res. 107 (Pt 10), 1132-1142 (2003)	2004-02-20	Peronospora arthurii	Oenothera biennis agg.	from GenBank	798	0	75	Pe. arthurii	~	Oenothera biennis	Gustavsson (1959): 167, Gäumann (1923): 299	~
AY198283	230435	Peronospora holostei	Holosteum umbellatum	Voglmayr,H.	Mycol. Res. 107 (Pt 10), 1132-1142 (2003)	2004-02-20	Peronospora holostei	Holosteum umbellatum	from GenBank	797	0	76	Pe. holostei	~	id.	Gustavsson (1959): 46, Gäumann (1923): 311	~
AY198282	230434	Peronospora polygoni	Polygonum aviculare	Voglmayr,H.	Mycol. Res. 107 (Pt 10), 1132-1142 (2003)	2004-02-20	Peronospora polygoni	Polygonum aviculare	from GenBank	801	0	77	Pe. polygoni	~	id.	Gustavsson (1959): 18, Gäumann (1923): 324	~
AY198281	230433	Peronospora claytoniae	Claytonia virginica	Voglmayr,H.	Mycol. Res. 107 (Pt 10), 1132-1142 (2003)	2004-02-20	Peronospora claytoniae	Claytonia virginica	from GenBank	797	0	78	Pe. claytoniae	~	id.	Constantinescu (1991): 26	~
AY198280	230432	Peronospora arenariae	Moehringia trinervia	Voglmayr,H.	Mycol. Res. 107 (Pt 10), 1132-1142 (2003)	2004-02-20	Peronospora arenariae	Moehringia trinervia	from GenBank	796	0	79	Pe. arenariae	~	id.	Gustavsson (1959): 49, Gäumann (1923): 48	~
AY198279	162097	Peronospora alsinearum	Stellaria media	Voglmayr,H.	Mycol. Res. 107 (Pt 10), 1132-1142 (2003)	2004-02-20	Peronospora alsinearum	Stellaria media	from GenBank	797	0	80	Pe. alsinearum	~	Stellaria media, Spergula morisonii	Gustavsson (1959): 36	~
AY198278	162096	Peronospora trivialis	Cerastium holosteoides	Voglmayr,H.	Mycol. Res. 107 (Pt 10), 1132-1142 (2003)	2004-02-20	Peronospora trivialis	Cerastium holosteoides	from GenBank	797	0	81	Pe. trivialis	~	Cerastium holosteoides (=fontanum ssp. triviale)	Gäumann (1923): 63	~
AY198277	230430	Peronospora paula	Cerastium holosteoides	Voglmayr,H.	Mycol. Res. 107 (Pt 10), 1132-1142 (2003)	2004-02-20	Peronospora paula	Cerastium holosteoides	from GenBank	798	1	82	Pe. parva	(IIa)	Stellaria holostea, S. calycantha, S. graminea, S. alsine	Gäumann (1923): 55	The older name is „P. parva“. Cerastium and Stellaria are very closely related genera that may be impossible to separate.
AY198276	230431	Peronospora parva	Stellaria holostea	Voglmayr,H.	Mycol. Res. 107 (Pt 10), 1132-1142 (2003)	2004-02-20	Peronospora parva	Stellaria holostea	from GenBank	798	1	82	Pe. parva	(IIa)	+ Stellaria calycantha, S. graminea, S. alsine	Gäumann (1923): 55	The older name is „P. parva“. Cerastium and Stellaria are very closely related genera that may be impossible to separate.
AY198275	230429	Peronospora esulae	Euphorbia esula	Voglmayr,H.	Mycol. Res. 107 (Pt 10), 1132-1142 (2003)	2004-02-20	Peronospora esulae	Euphorbia esula	from GenBank	801	0	83	Pe. esulae	~	id.	Constantinescu (1991): 38	~
AY198274	230428	Peronospora chrysosplenii	Chrysosplenium alternifolium	Voglmayr,H.	Mycol. Res. 107 (Pt 10), 1132-1142 (2003)	2004-02-20	Peronospora chrysosplenii	Chrysosplenium alternifolium	from GenBank	800	0	84	Pe. chrysosplenii	~	id.	Choi et al. (2007)	~
DQ643839	230428	Peronospora chrysosplenii	Chrysosplenium flagelliferum	Choi,Y.J., Hong,S.B. and Shin,H.D.	Mycol. Res. 111 (PT 4), 381-391 (2007)	2008-06-19	Peronospora chrysosplenii	Chrysosplenium flagelliferum	from GenBank	800	0	84	Pe. chrysosplenii	~	Chrysosplenium alternifolium	id.	~
AY198272	120572	Peronospora bulbocapni	Corydalis cava	Voglmayr,H.	Mycol. Res. 107 (Pt 10), 1132-1142 (2003)	2004-02-20	Peronospora bulbocapni	Corydalis cava	from GenBank	800	0	85	Pe. bulbocapni	IIb	Corydalis bulbosa (= Corydalis cava)	Gustavsson (1959): 76, Gäumann (1923): 80	The older name is „P. bulbocapni“. Whether accessions from Dicentra canadensis and Corydalis are really conspecific has to be investigated in detail.
AY198273	230427	Peronospora dicentrae	Dicentra canadensis	Voglmayr,H.	Mycol. Res. 107 (Pt 10), 1132-1142 (2003)	2004-02-20	Peronospora dicentrae	Dicentra canadensis	from GenBank	800	0	85	Pe. bulbocapni	IIb	Corydalis bulbosa (= Corydalis cava)	Gustavsson (1959): 76, Gäumann (1923): 80	The older name is „P. bulbocapni“. Whether accessions from Dicentra canadensis and Corydalis are really conspecific has to be investigated in detail.
AY198270	162095	Peronospora pulveracea	Helleborus niger	Voglmayr,H.	Mycol. Res. 107 (Pt 10), 1132-1142 (2003)	2004-02-20	Peronospora pulveracea	Helleborus niger	from GenBank	797	0	86	Pe. pulveracea	IIb	Helleborus foetidus	Gäumann (1923): 109	„P. pulveracea“ is the older name. The two accessions can well be conspecific, as there is not conflict with Gäumann's spore measurements and further descriptions. Helleborus und Ranunculus belong to the same family (Ranunculaceae).
AY198271	230426	Peronospora alpicola	Ranunculus aconitifolius	Voglmayr,H.	Mycol. Res. 107 (Pt 10), 1132-1142 (2003)	2004-02-20	Peronospora alpicola	Ranunculus aconitifolius	from GenBank	797	0	86	Pe. pulveracea	IIb	Helleborus foetidus	Gäumann (1923): 109	„P. pulveracea“ is the older name. The two accessions can well be conspecific, as there is not conflict with Gäumann's spore measurements and further descriptions. Helleborus und Ranunculus belong to the same family (Ranunculaceae).
AY198269	230425	Peronospora aff. ranunculi	Ranunculus recurvatus	Voglmayr,H.	Mycol. Res. 107 (Pt 10), 1132-1142 (2003)	2004-02-20	Peronospora ranunculi	Ranunculus recurvatus	from GenBank	801	1	87	Ranunculus recurvatus parasite C87	Ia	for Pe. ranunculi: R. alpestris, R. bulbosus, R. flammula, R. montanus, R. pedatus, R. polyanthemos, R. repens, R. sceleratus, R. velutinus	Gustavsson (1959): 63	~
AY198268	230424	Peronospora illyrica	Ranunculus illyricus	Voglmayr,H.	Mycol. Res. 107 (Pt 10), 1132-1142 (2003)	2004-02-20	Peronospora illyrica	Ranunculus illyricus	from GenBank	801	0	88	Pe. illyrica	~	Ranunculus illyricus	Gäumann (1923): 116	~
AY198267	230423	Peronospora ranunculi	Ranunculus acris	Voglmayr,H.	Mycol. Res. 107 (Pt 10), 1132-1142 (2003)	2004-02-20	Peronospora ranunculi	Ranunculus acris	from GenBank	801	0	89	Pe. ranunculi	Ia	R. alpestris, R. bulbosus, R. flammula, R. montanus, R. pedatus, R. polyanthemos, R. repens, R. sceleratus, R. velutinus	Gustavsson (1959): 63	~
EF174943	230422	Peronospora lotorum	UNKNOWN	Garcia-Blazquez,G., Goeker,M., Voglmayr,H., Martin,M.P.,	Mycol. Res. 112 (5), 502-512 (2008)	2008-04-28	Peronospora lotorum	Lotus corniculatus	from publication	824	0	90	Pe. lotorum	~	+ Lotus uliginosus	id.	~
AY198266	230422	Peronospora lotorum	Lotus corniculatus	Voglmayr,H.	Mycol. Res. 107 (Pt 10), 1132-1142 (2003)	2004-02-20	Peronospora lotorum	Lotus corniculatus	from GenBank	799	0	90	Pe. lotorum	~	+ Lotus uliginosus	Garcia-Blazquez et al. (2008)	~
AY198265	162099	Peronospora coronillae	Coronilla varia	Voglmayr,H.	Mycol. Res. 107 (Pt 10), 1132-1142 (2003)	2004-02-20	Peronospora coronillae	Coronilla varia	from GenBank	799	0	91	Coronillae varia parasite [Pe. coronillae p.p.]	Ia	+ Coronilla scorpioides	Garcia-Blazquez et al. (2008)	~
AY198264	230421	Peronospora asperuginis	Asperugo procumbens	Voglmayr,H.	Mycol. Res. 107 (Pt 10), 1132-1142 (2003)	2004-02-20	Peronospora asperuginis	Asperugo procumbens	from GenBank	797	0	92	Pe. asperuginis	~	id.	Gustavsson (1959): 175, Gäumann (1923): 169	~
AY198263	162098	Peronospora myosotidis	Myosotis arvensis	Voglmayr,H.	Mycol. Res. 107 (Pt 10), 1132-1142 (2003)	2004-02-20	Peronospora myosotidis	Myosotis arvensis	from GenBank	797	0	93	Pe. myosotidis	~	id.	Gustavsson (1959): 173, Gäumann (1923): 171	~
AY198262	230379	Peronospora astragalina	Astragalus cicer	Voglmayr,H.	Mycol. Res. 107 (Pt 10), 1132-1142 (2003)	2004-02-20	Peronospora astragalina	Astragalus cicer	from GenBank	804	0	94	Astragalus cicer/hamosus parasite [Pe. astragalina p.p.]	Ia	Astragalus alpinus, A. norvegicus	Kochman & Majewski (1970): 191	~
EF174904	230379	Peronospora astragalina	UNKNOWN	Garcia-Blazquez,G., Goeker,M., Voglmayr,H., Martin,M.P.,	Mycol. Res. 112 (5), 502-512 (2008)	2008-04-28	Peronospora astragalina	Astragalus hamosus	from publication	865	1	94	Astragalus cicer/hamosus parasite [Pe. astragalina p.p.]	Ia	Astragalus alpinus, A. norvegicus	Kochman & Majewski (1970): 191	~
AY919303	162118	Peronospora lamii	Lamium purpureum	Belbahri,L., Calmin,G., Pawlowski,J. and Lefort,F.	Mycol. Res. 109 (PT 11), 1276-1287 (2005)	2006-01-09	Peronospora lamii	Lamium purpureum	from GenBank	810	0	95	Pe. lamii	Ia	id.	Gustavsson (1959): 176, Gäumann (1923): 135	~
AY198261	162118	Peronospora lamii	Lamium purpureum	Voglmayr,H.	Mycol. Res. 107 (Pt 10), 1132-1142 (2003)	2004-02-20	Peronospora lamii	Lamium purpureum	from GenBank	810	0	95	Pe. lamii	Ia	id.	Gustavsson (1959): 176, Gäumann (1923): 136	~
AY198248	162117	Peronospora alta	Plantago major	Voglmayr,H.	Mycol. Res. 107 (Pt 10), 1132-1142 (2003)	2004-02-20	Peronospora alta	Plantago major	from GenBank	835	0	96	Pe. alta	~	id.	Gustavsson (1959): 194, Gäumann (1923): 307	~
AY198247	230374	Peronospora sordida	Scrophularia nodosa	Voglmayr,H.	Mycol. Res. 107 (Pt 10), 1132-1142 (2003)	2004-02-20	Peronospora sordida	Scrophularia nodosa	from GenBank	804	0	97	Pe. sordida	Ia/Ib/Ic?	Scrophularia sp.	Gustavsson (1959): 184, Gäumann (1923): 153	~
AY919302	230374	Peronospora sordida	Scrophularia nodosa	Belbahri,L., Calmin,G., Pawlowski,J. and Lefort,F.	Mycol. Res. 109 (PT 11), 1276-1287 (2005)	2006-01-09	Peronospora sordida	Scrophularia nodosa	from GenBank	804	0	97	Pe. sordida	Ia/Ib/Ic?	Scrophularia sp.	Gustavsson (1959): 184, Gäumann (1923): 153	~
AY198246	162113	Peronospora conglomerata	Geranium molle	Voglmayr,H.	Mycol. Res. 107 (Pt 10), 1132-1142 (2003)	2004-02-20	Peronospora conglomerata	Geranium molle	from GenBank	804	0	98	Pe. conglomerata	~	Geranium pusillum	Gustavsson (1959): 157, Gäumann (1923): 99	~
AY919304	162113	Peronospora conglomerata	Geranium molle	Belbahri,L., Calmin,G., Pawlowski,J. and Lefort,F.	Mycol. Res. 109 (PT 11), 1276-1287 (2005)	2006-01-09	Peronospora conglomerata	Geranium molle	from GenBank	803	0	98	Pe. conglomerata	~	Geranium pusillum	Gustavsson (1959): 157, Gäumann (1923): 99	~
AY198245	230373	Peronospora flava	Linaria vulgaris	Voglmayr,H.	Mycol. Res. 107 (Pt 10), 1132-1142 (2003)	2004-02-20	Peronospora flava	Linaria vulgaris	from GenBank	798	0	99	Pe. flava	~	id.	Gustavsson (1959): 182, Gäumann (1923): 151	~
AY198244	162115	Peronospora arvensis	Veronica triloba	Voglmayr,H.	Mycol. Res. 107 (Pt 10), 1132-1142 (2003)	2004-02-20	Peronospora arvensis	Veronica triloba	from GenBank	798	0	100	Pe. arvensis	~	Veronica hederifolia	Gustavsson (1959): 189, Gäumann (1923): 158	Host-species attribution follows Gustavsson (1959).
AY198243	230372	Peronospora agrestis	Veronica chamaedrys	Voglmayr,H.	Mycol. Res. 107 (Pt 10), 1132-1142 (2003)	2004-02-20	Peronospora agrestis	Veronica chamaedrys	from GenBank	796	0	101	Pe. agrestis	~	Veronica polita	Gustavsson (1959): 190, Gäumann (1923): 156	Host-species attribution follows Gustavsson (1959).
AY198242	162116	Peronospora grisea	Veronica beccabunga	Voglmayr,H.	Mycol. Res. 107 (Pt 10), 1132-1142 (2003)	2004-02-20	Peronospora grisea	Veronica beccabunga	from GenBank	796	0	102	Pe. grisea	~	id.	Gustavsson (1959): 187, Gäumann (1923): 160	Host-species attribution follows Gustavsson (1959).
AY198241	162116	Peronospora grisea	Veronica serpyllifolia	Voglmayr,H.	Mycol. Res. 107 (Pt 10), 1132-1142 (2003)	2004-02-20	Peronospora grisea	Veronica serpyllifolia	from GenBank	796	0	102	Pe. grisea	~	Veronica beccabunga	Gustavsson (1959): 187, Gäumann (1923): 160	Host-species attribution follows Gustavsson (1959).
AY198240	230371	Peronospora violae	Viola arvensis	Voglmayr,H.	Mycol. Res. 107 (Pt 10), 1132-1142 (2003)	2004-02-20	Peronospora violae	Viola arvensis	from GenBank	803	0	103	Pe. violae	~	Viola arvensis, V. riviniana	Gustavsson (1959): 165	~
AY198239	230370	Peronospora aff. potentillae	Duchesnea indica	Voglmayr,H.	Mycol. Res. 107 (Pt 10), 1132-1142 (2003)	2004-02-20	Peronospora potentillae	Duchesnea indica	from GenBank	795	0	104	Pe. potentillae	~	Potentilla aurea	Gustavsson (1959): 121, Gäumann (1923): 292	~
AY198238	230369	Peronospora potentillae	Potentilla aurea	Voglmayr,H.	Mycol. Res. 107 (Pt 10), 1132-1142 (2003)	2004-02-20	Peronospora potentillae	Potentilla aurea	from GenBank	795	0	104	Pe. potentillae	~	id.	Gustavsson (1959): 121, Gäumann (1923): 292	~
AY198237	162106	Peronospora trifolii-alpestris	Trifolium alpestris	Voglmayr,H.	Mycol. Res. 107 (Pt 10), 1132-1142 (2003)	2004-02-20	Peronospora trifolii-alpestris	Trifolium alpestre	from GenBank, corrected	1254	0	105	Trifolium alpestre parasite C105 [Pe. trifolii-alpestris p.p.]	Ib/Ic?	id.	Gustavsson (1959): 137, Gäumann (1923): 210, García-Blázquez et al. (2008)	~
EF174930	230366	Peronospora trifoliorum f. trifolii-pratensis	UNKNOWN	Garcia-Blazquez,G., Goeker,M., Voglmayr,H., Martin,M.P.,	Mycol. Res. 112 (5), 502-512 (2008)	2008-04-28	Peronospora trifoliorum	Trifolium pratense	from publication	1246	0	106	Pe. trifolii-pratensis	Ia	id.	Gustavsson (1959): 136	~
AY198236	230366	Peronospora trifoliorum f. trifolii-pratensis	Trifolium pratense	Voglmayr,H.	Mycol. Res. 107 (Pt 10), 1132-1142 (2003)	2004-02-20	Peronospora trifoliorum	Trifolium pratense	from GenBank	1260	0	106	Pe. trifolii-pratensis	Ia	id.	Gustavsson (1959): 136, García-Blázquez et al. (2008)	~
EF174929	230366	Peronospora trifoliorum f. trifolii-pratensis	UNKNOWN	Garcia-Blazquez,G., Goeker,M., Voglmayr,H., Martin,M.P.,	Mycol. Res. 112 (5), 502-512 (2008)	2008-04-28	Peronospora trifoliorum	Trifolium pratense	from publication	1252	1	106	Pe. trifolii-pratensis	Ia	id.	Gustavsson (1959): 136	~
EF174931	230366	Peronospora trifoliorum f. trifolii-pratensis	UNKNOWN	Garcia-Blazquez,G., Goeker,M., Voglmayr,H., Martin,M.P.,	Mycol. Res. 112 (5), 502-512 (2008)	2008-04-28	Peronospora trifoliorum	Trifolium pratense	from publication	1247	0	106	Pe. trifolii-pratensis	Ia	id.	Gustavsson (1959): 136	~
EF174957	230366	Peronospora trifoliorum f. trifolii-pratensis	UNKNOWN	Garcia-Blazquez,G., Goeker,M., Voglmayr,H., Martin,M.P.,	Mycol. Res. 112 (5), 502-512 (2008)	2008-04-28	Peronospora trifoliorum	Trifolium pratense	from publication	1241	0	106	Pe. trifolii-pratensis	Ia	id.	Gustavsson (1959): 136	~
EF174962	162105	Peronospora trifolii-hybridi	UNKNOWN	Garcia-Blazquez,G., Goeker,M., Voglmayr,H., Martin,M.P.,	Mycol. Res. 112 (5), 502-512 (2008)	2008-04-28	Peronospora trifolii-hybridi	Trifolium hybridum	from publication	990	0	107	Trifolium hybridum/repens parasite [Pe. trifolii-hybridi == P. trifolii-repentis]	IIa	+ Trifolium spadiceum, T. striatum (for P. trifolii-hybridi)	id.	Additional investigations are needed to investigate whether both species are really conspecific. The two subclades differ by a different number of repetitive elements in the ITS.
EF174900	162105	Peronospora trifolii-hybridi	UNKNOWN	Garcia-Blazquez,G., Goeker,M., Voglmayr,H., Martin,M.P.,	Mycol. Res. 112 (5), 502-512 (2008)	2008-04-28	Peronospora trifolii-hybridi	Trifolium hybridum	from publication	1015	0	107	Trifolium hybridum/repens parasite [Pe. trifolii-hybridi == P. trifolii-repentis]	IIa	+ Trifolium spadiceum, T. striatum (for P. trifolii-hybridi)	id.	Additional investigations are needed to investigate whether both species are really conspecific. The two subclades differ by a different number of repetitive elements in the ITS.
EF174916	162105	Peronospora trifolii-hybridi	UNKNOWN	Garcia-Blazquez,G., Goeker,M., Voglmayr,H., Martin,M.P.,	Mycol. Res. 112 (5), 502-512 (2008)	2008-04-28	Peronospora trifolii-hybridi	Trifolium hybridum	from publication	958	0	107	Trifolium hybridum/repens parasite [Pe. trifolii-hybridi == P. trifolii-repentis]	IIa	+ Trifolium spadiceum, T. striatum (for P. trifolii-hybridi)	id.	Additional investigations are needed to investigate whether both species are really conspecific. The two subclades differ by a different number of repetitive elements in the ITS.
EF174915	162105	Peronospora trifolii-hybridi	UNKNOWN	Garcia-Blazquez,G., Goeker,M., Voglmayr,H., Martin,M.P.,	Mycol. Res. 112 (5), 502-512 (2008)	2008-04-28	Peronospora trifolii-hybridi	Trifolium hybridum	from publication	950	0	107	Trifolium hybridum/repens parasite [Pe. trifolii-hybridi == P. trifolii-repentis]	IIa	+ Trifolium spadiceum, T. striatum (for P. trifolii-hybridi)	id.	Additional investigations are needed to investigate whether both species are really conspecific. The two subclades differ by a different number of repetitive elements in the ITS.
EF174914	162105	Peronospora trifolii-hybridi	UNKNOWN	Garcia-Blazquez,G., Goeker,M., Voglmayr,H., Martin,M.P.,	Mycol. Res. 112 (5), 502-512 (2008)	2008-04-28	Peronospora trifolii-hybridi	Trifolium hybridum	from publication	947	0	107	Trifolium hybridum/repens parasite [Pe. trifolii-hybridi == P. trifolii-repentis]	IIa	+ Trifolium spadiceum, T. striatum (for P. trifolii-hybridi)	id.	Additional investigations are needed to investigate whether both species are really conspecific. The two subclades differ by a different number of repetitive elements in the ITS.
EF174925	162105	Peronospora trifolii-hybridi	UNKNOWN	Garcia-Blazquez,G., Goeker,M., Voglmayr,H., Martin,M.P.,	Mycol. Res. 112 (5), 502-512 (2008)	2008-04-28	Peronospora trifolii-hybridi	Trifolium hybridum	from publication	1025	2	107	Trifolium hybridum/repens parasite [Pe. trifolii-hybridi == P. trifolii-repentis]	IIa	+ Trifolium spadiceum, T. striatum (for P. trifolii-hybridi)	id.	Additional investigations are needed to investigate whether both species are really conspecific. The two subclades differ by a different number of repetitive elements in the ITS.
AY198235	162105	Peronospora trifolii-hybridi	Trifolium hybridum	Voglmayr,H.	Mycol. Res. 107 (Pt 10), 1132-1142 (2003)	2004-02-20	Peronospora trifolii-hybridi	Trifolium hybridum	from GenBank	1009	1	107	Trifolium hybridum/repens parasite [Pe. trifolii-hybridi == P. trifolii-repentis]	IIa	+ Trifolium spadiceum, T. striatum (for P. trifolii-hybridi)	García-Blázquez et al. (2008)	Additional investigations are needed to investigate whether both species are really conspecific. The two subclades differ by a different number of repetitive elements in the ITS.
EF174955	230368	Peronospora trifolii-repentis	UNKNOWN	Garcia-Blazquez,G., Goeker,M., Voglmayr,H., Martin,M.P.,	Mycol. Res. 112 (5), 502-512 (2008)	2008-04-28	Peronospora trifolii-repentis	Trifolium repens	from publication	902	0	107	Trifolium hybridum/repens parasite [Pe. trifolii-hybridi == P. trifolii-repentis]	IIa	+ Trifolium repens, T. rubens (for P. trifolii-repentis)	id.	Additional investigations are needed to investigate whether both species are really conspecific. The two subclades differ by a different number of repetitive elements in the ITS.
AY198234	230368	Peronospora trifolii-repentis	Trifolium repens	Voglmayr,H.	Mycol. Res. 107 (Pt 10), 1132-1142 (2003)	2004-02-20	Peronospora trifolii-repentis	Trifolium repens	from GenBank	882	1	107	Trifolium hybridum/repens parasite [Pe. trifolii-hybridi == P. trifolii-repentis]	IIa	+ Trifolium repens, T. rubens (for P. trifolii-repentis)	García-Blázquez et al. (2008)	Additional investigations are needed to investigate whether both species are really conspecific. The two subclades differ by a different number of repetitive elements in the ITS.
EF174932	230368	Peronospora trifolii-repentis	UNKNOWN	Garcia-Blazquez,G., Goeker,M., Voglmayr,H., Martin,M.P.,	Mycol. Res. 112 (5), 502-512 (2008)	2008-04-28	Peronospora trifolii-repentis	Trifolium repens	from publication	900	0	107	Trifolium hybridum/repens parasite [Pe. trifolii-hybridi == P. trifolii-repentis]	IIa	+ Trifolium repens, T. rubens (for P. trifolii-repentis)	id.	Additional investigations are needed to investigate whether both species are really conspecific. The two subclades differ by a different number of repetitive elements in the ITS.
EF174968	162105	Peronospora trifolii-hybridi	UNKNOWN	Garcia-Blazquez,G., Goeker,M., Voglmayr,H., Martin,M.P.,	Mycol. Res. 112 (5), 502-512 (2008)	2008-04-28	Peronospora trifolii-hybridi	Trifolium repens	from publication	1068	9	107	Trifolium hybridum/repens parasite [Pe. trifolii-hybridi == P. trifolii-repentis]	IIa	+ Trifolium repens, T. rubens (for P. trifolii-repentis)	id.	Additional investigations are needed to investigate whether both species are really conspecific. The two subclades differ by a different number of repetitive elements in the ITS.
EF174919	162104	Peronospora trifolii-minoris	UNKNOWN	Garcia-Blazquez,G., Goeker,M., Voglmayr,H., Martin,M.P.,	Mycol. Res. 112 (5), 502-512 (2008)	2008-04-28	Peronospora trifolii-minoris	Trifolium badium	from publication	854	1	108	Trifolium badium/cf. spadiceum parasite [Pe. trifolii-minoris p.p.]	Ia	+ Trifolium aureum, T. campestre, T. dubium, T. patens	id.	~
AY198233	162104	Peronospora trifolii-minoris	Trifolium badium	Voglmayr,H.	Mycol. Res. 107 (Pt 10), 1132-1142 (2003)	2004-02-20	Peronospora trifolii-minoris	Trifolium badium	from GenBank	880	0	108	Trifolium badium/cf. spadiceum parasite [Pe. trifolii-minoris p.p.]	Ia	+ Trifolium aureum, T. campestre, T. dubium, T. patens	García-Blázquez et al. (2008)	~
EF174965	162104	Peronospora trifolii-minoris	UNKNOWN	Garcia-Blazquez,G., Goeker,M., Voglmayr,H., Martin,M.P.,	Mycol. Res. 112 (5), 502-512 (2008)	2008-04-28	Peronospora trifolii-minoris	Trifolium badium	from publication	944	0	108	Trifolium badium/cf. spadiceum parasite [Pe. trifolii-minoris p.p.]	Ia	+ Trifolium aureum, T. campestre, T. dubium, T. patens	id.	~
EF174918	162104	Peronospora trifolii-minoris	UNKNOWN	Garcia-Blazquez,G., Goeker,M., Voglmayr,H., Martin,M.P.,	Mycol. Res. 112 (5), 502-512 (2008)	2008-04-28	Peronospora trifolii-minoris	Trifolium badium	from publication	854	1	108	Trifolium badium/cf. spadiceum parasite [Pe. trifolii-minoris p.p.]	Ia	+ Trifolium aureum, T. campestre, T. dubium, T. patens	id.	~
EF174960	162104	Peronospora trifolii-minoris	UNKNOWN	Garcia-Blazquez,G., Goeker,M., Voglmayr,H., Martin,M.P.,	Mycol. Res. 112 (5), 502-512 (2008)	2008-04-28	Peronospora trifolii-minoris	Trifolium cf. spadiceum	from publication	944	0	108	Trifolium badium/cf. spadiceum parasite [Pe. trifolii-minoris p.p.]	Ia	Trifolium aureum, T. dubium, T. badium, T. patens, T. campestre	id.	~
EF174964	435254	Peronospora sp. MG1797	UNKNOWN	Garcia-Blazquez,G., Goeker,M., Voglmayr,H., Martin,M.P.,	Mycol. Res. 112 (5), 502-512 (2008)	2008-04-28	~	Trifolium sp.	from publication	937	0	108	Trifolium badium/cf. spadiceum parasite [Pe. trifolii-minoris p.p.]	Ia	~	id.	~
AY198232	230365	Peronospora ervi	Vicia hirsuta	Voglmayr,H.	Mycol. Res. 107 (Pt 10), 1132-1142 (2003)	2004-02-20	Peronospora ervi	Vicia hirsuta	from GenBank	798	0	109	Pe. ervi	Ia	id.	Gustavsson (1959): 145	~
AY198231	230364	Peronospora mayorii	Vicia cracca	Voglmayr,H.	Mycol. Res. 107 (Pt 10), 1132-1142 (2003)	2004-02-20	Peronospora mayorii	Vicia cracca	from GenBank	803	0	110	Pe. mayorii	Ia	+ Vicia lutea, V. sativa ssp. nigra	Gustavsson (1959): 146	~
EF174953	102136	Peronospora viciae	UNKNOWN	Garcia-Blazquez,G., Goeker,M., Voglmayr,H., Martin,M.P.,	Mycol. Res. 112 (5), 502-512 (2008)	2008-04-28	Peronospora viciae	Vicia angustifolia	from publication	850	0	111	Pe. viciae	Ia	Vicia sativa	Gustavsson (1959): 143	~
EF174902	102136	Peronospora viciae	UNKNOWN	Garcia-Blazquez,G., Goeker,M., Voglmayr,H., Martin,M.P.,	Mycol. Res. 112 (5), 502-512 (2008)	2008-04-28	Peronospora viciae	Vicia angustifolia	from publication	863	0	111	Pe. viciae	Ia	Vicia sativa	Gustavsson (1959): 143	~
EF174934	102136	Peronospora viciae	UNKNOWN	Garcia-Blazquez,G., Goeker,M., Voglmayr,H., Martin,M.P.,	Mycol. Res. 112 (5), 502-512 (2008)	2008-04-28	Peronospora viciae	Vicia angustifolia	from publication	820	0	111	Pe. viciae	Ia	Vicia sativa	Gustavsson (1959): 143	~
AY198230	102136	Peronospora viciae	Vicia angustifolia	Voglmayr,H.	Mycol. Res. 107 (Pt 10), 1132-1142 (2003)	2004-02-20	Peronospora viciae	Vicia angustifolia	from GenBank	802	0	111	Pe. viciae	Ia	Vicia sativa	Gustavsson (1959): 143, García-Blázquez et al. (2008)	~
EF174950	102136	Peronospora viciae	UNKNOWN	Garcia-Blazquez,G., Goeker,M., Voglmayr,H., Martin,M.P.,	Mycol. Res. 112 (5), 502-512 (2008)	2008-04-28	Peronospora viciae	Vicia sativa sensu lato	from publication	780	0	111	Pe. viciae	Ia	id.	Gustavsson (1959): 143	~
EF174947	230363	Peronospora meliloti	UNKNOWN	Garcia-Blazquez,G., Goeker,M., Voglmayr,H., Martin,M.P.,	Mycol. Res. 112 (5), 502-512 (2008)	2008-04-28	Peronospora meliloti	Melilotus albus	from publication	774	0	112	Pe. meliloti	~	+ Melilotus altissima, M. indica, M. officinalis	id.	~
EF174946	230363	Peronospora meliloti	UNKNOWN	Garcia-Blazquez,G., Goeker,M., Voglmayr,H., Martin,M.P.,	Mycol. Res. 112 (5), 502-512 (2008)	2008-04-28	Peronospora meliloti	Melilotus officinalis	from publication	802	0	112	Pe. meliloti	~	+ Melilotus alba, M. altissima, M. indica	id.	~
AY198229	230363	Peronospora meliloti	Melilotus officinalis	Voglmayr,H.	Mycol. Res. 107 (Pt 10), 1132-1142 (2003)	2004-02-20	Peronospora meliloti	Melilotus officinalis	from GenBank	802	0	112	Pe. meliloti	~	+ Melilotus alba, M. altissima, M. indica	García-Blázquez et al. (2008)	~
EF174899	230363	Peronospora meliloti	UNKNOWN	Garcia-Blazquez,G., Goeker,M., Voglmayr,H., Martin,M.P.,	Mycol. Res. 112 (5), 502-512 (2008)	2008-04-28	Peronospora meliloti	Melilotus sp.	from publication	863	0	112	Pe. meliloti	~	Melilotus alba, M. altissima, M. indica, M. officinalis	id.	~
EF174961	434350	Peronospora medicaginis-minimae	UNKNOWN	Garcia-Blazquez,G., Goeker,M., Voglmayr,H., Martin,M.P.,	Mycol. Res. 112 (5), 502-512 (2008)	2008-04-28	Peronospora medicaginis-minimae	Medicago lupulina	from publication	851	0	113	Pe. medicaginis-minimae	IIa	Medicago minima	Gaponenko (1972)	~
EF174892	434350	Peronospora medicaginis-minimae	UNKNOWN	Garcia-Blazquez,G., Goeker,M., Voglmayr,H., Martin,M.P.,	Mycol. Res. 112 (5), 502-512 (2008)	2008-04-28	Peronospora medicaginis-minimae	Medicago lupulina	from publication	767	0	113	Pe. medicaginis-minimae	IIa	Medicago minima	Gaponenko (1972)	~
EF174954	434350	Peronospora medicaginis-minimae	UNKNOWN	Garcia-Blazquez,G., Goeker,M., Voglmayr,H., Martin,M.P.,	Mycol. Res. 112 (5), 502-512 (2008)	2008-04-28	Peronospora medicaginis-minimae	Medicago lupulina	from publication	867	0	113	Pe. medicaginis-minimae	IIa	Medicago minima	Gaponenko (1972)	~
AY198228	230362	Peronospora romanica	Medicago lupulina	Voglmayr,H.	Mycol. Res. 107 (Pt 10), 1132-1142 (2003)	2004-02-20	Peronospora romanica	Medicago lupulina	from GenBank	804	0	113	Pe. medicaginis-minimae	IIa	Medicago minima (for Pe. medicaginis-minimae)	Gaponenko (1972)	We prefer “Pe. medicaginis-minimae”, which was introduced by Gaponenko (1972) for the Peronospora on Medicago minima. “Pe. romanica” was described by Savul. & Rayss (1931) for the parasite of Medicago falcata var. romanica.
EF174948	434350	Peronospora medicaginis-minimae	UNKNOWN	Garcia-Blazquez,G., Goeker,M., Voglmayr,H., Martin,M.P.,	Mycol. Res. 112 (5), 502-512 (2008)	2008-04-28	Peronospora medicaginis-minimae	Medicago lupulina	from publication	770	0	113	Pe. medicaginis-minimae	IIa	Medicago minima	Gaponenko (1972)	~
EF174933	434350	Peronospora medicaginis-minimae	UNKNOWN	Garcia-Blazquez,G., Goeker,M., Voglmayr,H., Martin,M.P.,	Mycol. Res. 112 (5), 502-512 (2008)	2008-04-28	Peronospora medicaginis-minimae	Medicago minima	from publication	823	0	113	Pe. medicaginis-minimae	IIa	id.	Gaponenko (1972)	~
EF174905	434350	Peronospora medicaginis-minimae	UNKNOWN	Garcia-Blazquez,G., Goeker,M., Voglmayr,H., Martin,M.P.,	Mycol. Res. 112 (5), 502-512 (2008)	2008-04-28	Peronospora medicaginis-minimae	Medicago minima	from publication	878	1	113	Pe. medicaginis-minimae	IIa	id.	Gaponenko (1972)	~
EF174906	434355	Peronospora medicaginis-orbicularis	UNKNOWN	Garcia-Blazquez,G., Goeker,M., Voglmayr,H., Martin,M.P.,	Mycol. Res. 112 (5), 502-512 (2008)	2008-04-28	Peronospora medicaginis-orbicularis	Medicago orbicularis	from publication	837	0	114	Medicago orbicularis/sativa parasite [Pe. aestivalis s.l. p.p.]	IIa	Medicago lupulina, M. minima, M. polymorpha, M. sativa, M. sativa ssp. falcata (for Pe. aestivalis)	id.	"Pe. aestivalis" was published in 1923. "Pe. medicaginis-orbicularis" was published as parasite of Medicago orbicularis in 1946. Thus, "Pe. aestivalis" has precedence over "Pe. medicaginis-orbicularis".
EF174969	162107	Peronospora aestivalis	UNKNOWN	Garcia-Blazquez,G., Goeker,M., Voglmayr,H., Martin,M.P.,	Mycol. Res. 112 (5), 502-512 (2008)	2008-04-28	Peronospora aestivalis	Medicago sativa	from publication	821	0	114	Medicago orbicularis/sativa parasite [Pe. aestivalis s.l. p.p.]	Ia, IIa	+ Medicago lupulina, M. minima, M. polymorpha, M. sativa ssp. falcata	id.	~
EF174949	162107	Peronospora aestivalis	UNKNOWN	Garcia-Blazquez,G., Goeker,M., Voglmayr,H., Martin,M.P.,	Mycol. Res. 112 (5), 502-512 (2008)	2008-04-28	Peronospora aestivalis	Medicago sativa	from publication	836	0	114	Medicago orbicularis/sativa parasite [Pe. aestivalis s.l. p.p.]	Ia, IIa	+ Medicago lupulina, M. minima, M. polymorpha, M. sativa ssp. falcata	id.	~
AY198227	162107	Peronospora aestivalis	Medicago sativa	Voglmayr,H.	Mycol. Res. 107 (Pt 10), 1132-1142 (2003)	2004-02-20	Peronospora aestivalis	Medicago sativa	from GenBank	803	0	114	Medicago orbicularis/sativa parasite [Pe. aestivalis s.l. p.p.]	Ia, IIa	+ Medicago lupulina, M. minima, M. polymorpha, M. sativa ssp. falcata	García-Blázquez et al. (2008)	~
DQ885375	102135	Peronospora cristata	Meconopsis cambrica	Landa,B.B., Montes-Borrego,M., Munoz-Ledesma,F.J. and	Unpublished	2007-10-21	Peronospora cristata	Meconopsis cambrica	from GenBank	798	0	115	Pe. cristata	~	Papaver hybridum	Landa et al. (2007)	~
DQ885374	102135	Peronospora cristata	Meconopsis cambrica	Landa,B.B., Montes-Borrego,M., Munoz-Ledesma,F.J. and	Unpublished	2007-10-21	Peronospora cristata	Meconopsis cambrica	from GenBank	798	0	115	Pe. cristata	~	Papaver hybridum	Landa et al. (2007)	~
AY374984	102135	Peronospora cristata	Meconopsis cambrica	Cooke,D.E.L. and Williams,N.A.	Unpublished	2003-09-17	Peronospora cristata	Meconopsis cambrica	from GenBank	796	2	115	Pe. cristata	~	Papaver hybridum	Landa et al. (2007)	~
AY225478	102135	Peronospora cristata	UNKNOWN	Scott,J.B., Hay,F.S. and Wilson,C.R.	Mycol. Res. 108, 198-205 (2004)	2004-03-24	Peronospora cristata	Papaver somniferum	from publication	810	0	115	Pe. cristata	~	Papaver hybridum	Landa et al. (2007)	~
AY225481	102135	Peronospora cristata	UNKNOWN	Scott,J.B., Hay,F.S. and Wilson,C.R.	Mycol. Res. 108, 198-205 (2004)	2004-03-24	Peronospora cristata	Papaver somniferum	from publication	810	0	115	Pe. cristata	~	Papaver hybridum	Landa et al. (2007)	~
AY225479	102135	Peronospora cristata	UNKNOWN	Scott,J.B., Hay,F.S. and Wilson,C.R.	Mycol. Res. 108, 198-205 (2004)	2004-03-24	Peronospora cristata	Papaver somniferum	from publication	810	0	115	Pe. cristata	~	Papaver hybridum	Landa et al. (2007)	~
AY225474	102135	Peronospora cristata	UNKNOWN	Scott,J.B., Hay,F.S. and Wilson,C.R.	Mycol. Res. 108, 198-205 (2004)	2004-03-24	Peronospora cristata	Papaver somniferum	from publication	810	0	115	Pe. cristata	~	Papaver hybridum	Landa et al. (2007)	~
AY225475	102135	Peronospora cristata	UNKNOWN	Scott,J.B., Hay,F.S. and Wilson,C.R.	Mycol. Res. 108, 198-205 (2004)	2004-03-24	Peronospora cristata	Papaver somniferum	from publication	810	0	115	Pe. cristata	~	Papaver hybridum	Landa et al. (2007)	~
AY225473	102135	Peronospora cristata	UNKNOWN	Scott,J.B., Hay,F.S. and Wilson,C.R.	Mycol. Res. 108, 198-205 (2004)	2004-03-24	Peronospora cristata	Papaver somniferum	from publication	810	0	115	Pe. cristata	~	Papaver hybridum	Landa et al. (2007)	~
AY225472	102135	Peronospora cristata	UNKNOWN	Scott,J.B., Hay,F.S. and Wilson,C.R.	Mycol. Res. 108, 198-205 (2004)	2004-03-24	Peronospora cristata	Papaver somniferum	from publication	810	0	115	Pe. cristata	~	Papaver hybridum	Landa et al. (2007)	~
AY225476	102135	Peronospora cristata	UNKNOWN	Scott,J.B., Hay,F.S. and Wilson,C.R.	Mycol. Res. 108, 198-205 (2004)	2004-03-24	Peronospora cristata	Papaver somniferum	from publication	810	0	115	Pe. cristata	~	Papaver hybridum	Landa et al. (2007)	~
AY225480	102135	Peronospora cristata	UNKNOWN	Scott,J.B., Hay,F.S. and Wilson,C.R.	Mycol. Res. 108, 198-205 (2004)	2004-03-24	Peronospora cristata	Papaver somniferum	from publication	810	0	115	Pe. cristata	~	Papaver hybridum	Landa et al. (2007)	~
AY225482	102135	Peronospora cristata	UNKNOWN	Scott,J.B., Hay,F.S. and Wilson,C.R.	Mycol. Res. 108, 198-205 (2004)	2004-03-24	Peronospora cristata	Papaver somniferum	from publication	810	0	115	Pe. cristata	~	Papaver hybridum	Landa et al. (2007)	~
AY225477	102135	Peronospora cristata	UNKNOWN	Scott,J.B., Hay,F.S. and Wilson,C.R.	Mycol. Res. 108, 198-205 (2004)	2004-03-24	Peronospora cristata	Papaver somniferum	from publication	810	0	115	Pe. cristata	~	Papaver hybridum	Landa et al. (2007)	~
AF448225	162120	Pseudoperonospora humuli	UNKNOWN	Patzak,J.	Unpublished	2001-12-12	Pseudoperonospora humuli	UNKNOWN	no reference	822	0	116	parasite of unknown host C116 [Ps. cubensis p.p.]	Ib	Cucurbita pepo	Choi et al. (2005)	~

## Sheet: Host_Taxonomy
The host taxonomy, according to the GenBank/NCBI taxonomy release on 19/01/2008
A star (*) indicates that a parent taxon of the requested rank is not present in the NCBI taxonomy. The parent taxon of the closest higher rank is printed instead.
GENUS	SUBCLASS	ORDER	FAMILY	SUBFAMILY	TRIBE
Alchemilla	rosids	Rosales	Rosaceae	Rosoideae	*Rosoideae
Allium	*Liliopsida	Asparagales	Alliaceae	*Alliaceae	*Alliaceae
Anthemis	asterids	Asterales	Asteraceae	Asteroideae	Anthemideae
Arenaria <Caryophyllaceae>	*Spermatophyta	Caryophyllales	Caryophyllaceae	*Caryophyllaceae	*Caryophyllaceae
Astragalus	rosids	Fabales	Fabaceae	Papilionoideae	Galegeae
Atriplex	*Spermatophyta	Caryophyllales	Amaranthaceae	*Amaranthaceae	*Amaranthaceae
Bassia	*Spermatophyta	Caryophyllales	Amaranthaceae	*Amaranthaceae	*Amaranthaceae
Beta <angiosperm>	*Spermatophyta	Caryophyllales	Amaranthaceae	*Amaranthaceae	*Amaranthaceae
Cannabis	rosids	Rosales	Cannabaceae	*Cannabaceae	*Cannabaceae
Celtis	rosids	Rosales	Ulmaceae	*Ulmaceae	*Ulmaceae
Cerastium	*Spermatophyta	Caryophyllales	Caryophyllaceae	*Caryophyllaceae	*Caryophyllaceae
Chenopodium	*Spermatophyta	Caryophyllales	Amaranthaceae	*Amaranthaceae	*Amaranthaceae
Chrysosplenium	*Spermatophyta	Saxifragales	Saxifragaceae	*Saxifragaceae	*Saxifragaceae
Citrullus	rosids	Cucurbitales	Cucurbitaceae	*Cucurbitaceae	*Cucurbitaceae
Claytonia	*Spermatophyta	Caryophyllales	Portulacaceae	*Portulacaceae	*Portulacaceae
Coronilla	rosids	Fabales	Fabaceae	Papilionoideae	Loteae
Corydalis	*Spermatophyta	Ranunculales	*Ranunculales	Fumariaceae	*Fumariaceae
Cucumis	rosids	Cucurbitales	Cucurbitaceae	*Cucurbitaceae	*Cucurbitaceae
Cucurbita	rosids	Cucurbitales	Cucurbitaceae	*Cucurbitaceae	*Cucurbitaceae
Dicentra	*Spermatophyta	Ranunculales	*Ranunculales	Fumariaceae	*Fumariaceae
Duchesnea	rosids	Rosales	Rosaceae	Rosoideae	*Rosoideae
Euphorbia	rosids	Malpighiales	Euphorbiaceae	Euphorbioideae	Euphorbieae
Galium	asterids	Gentianales	Rubiaceae	Rubioideae	Rubieae
Geranium	rosids	Geraniales	Geraniaceae	*Geraniaceae	*Geraniaceae
Glycine	rosids	Fabales	Fabaceae	Papilionoideae	Phaseoleae
Helleborus	*Spermatophyta	Ranunculales	Ranunculaceae	*Ranunculaceae	*Ranunculaceae
Holosteum	*Spermatophyta	Caryophyllales	Caryophyllaceae	*Caryophyllaceae	*Caryophyllaceae
Humulus	rosids	Rosales	Cannabaceae	*Cannabaceae	*Cannabaceae
Knautia	asterids	Dipsacales	Dipsacaceae	*Dipsacaceae	*Dipsacaceae
Lagenaria	rosids	Cucurbitales	Cucurbitaceae	*Cucurbitaceae	*Cucurbitaceae
Lamium	asterids	Lamiales	Lamiaceae	Lamioideae	*Lamioideae
Lathyrus	rosids	Fabales	Fabaceae	Papilionoideae	Fabeae
Linaria	asterids	Lamiales	Plantaginaceae	*Plantaginaceae	Antirrhineae
Lotus	rosids	Fabales	Fabaceae	Papilionoideae	Loteae
Meconopsis	*Spermatophyta	Ranunculales	Papaveraceae	*Papaveraceae	*Papaveraceae
Medicago	rosids	Fabales	Fabaceae	Papilionoideae	Trifolieae
Melampyrum	asterids	Lamiales	Orobanchaceae	*Orobanchaceae	Rhinantheae
Melilotus	rosids	Fabales	Fabaceae	Papilionoideae	Trifolieae
Mentha	asterids	Lamiales	Lamiaceae	Nepetoideae	Mentheae
Moehringia	*Spermatophyta	Caryophyllales	Caryophyllaceae	*Caryophyllaceae	*Caryophyllaceae
Myosotis	asterids	*lamiids	Boraginaceae	*Boraginaceae	*Boraginaceae
Nicotiana	asterids	Solanales	Solanaceae	Nicotianoideae	*Nicotianoideae
Ocimum	asterids	Lamiales	Lamiaceae	Nepetoideae	Ocimeae
Oenothera	rosids	Myrtales	Onagraceae	*Onagraceae	*Onagraceae
Ornithopus	rosids	Fabales	Fabaceae	Papilionoideae	Loteae
Papaver	*Spermatophyta	Ranunculales	Papaveraceae	*Papaveraceae	*Papaveraceae
Pisum	rosids	Fabales	Fabaceae	Papilionoideae	Fabeae
Plantago	asterids	Lamiales	Plantaginaceae	*Plantaginaceae	Plantagineae
Polygonum	*Spermatophyta	Caryophyllales	Polygonaceae	*Polygonaceae	*Polygonaceae
Potentilla	rosids	Rosales	Rosaceae	Rosoideae	*Rosoideae
Ranunculus	*Spermatophyta	Ranunculales	Ranunculaceae	*Ranunculaceae	*Ranunculaceae
Rhododendron	asterids	Ericales	Ericaceae	Ericoideae	Rhodoreae
Rosa	rosids	Rosales	Rosaceae	Rosoideae	*Rosoideae
Rubus	rosids	Rosales	Rosaceae	Rosoideae	*Rosoideae
Rumex	*Spermatophyta	Caryophyllales	Polygonaceae	*Polygonaceae	*Polygonaceae
Salvia	asterids	Lamiales	Lamiaceae	Nepetoideae	Mentheae
Scabiosa	asterids	Dipsacales	Dipsacaceae	*Dipsacaceae	*Dipsacaceae
Scrophularia	asterids	Lamiales	Scrophulariaceae	*Scrophulariaceae	Scrophularieae
Sherardia	asterids	Gentianales	Rubiaceae	Rubioideae	Rubieae
Solenostemon	asterids	Lamiales	Lamiaceae	Nepetoideae	Ocimeae
Spergula	*Spermatophyta	Caryophyllales	Caryophyllaceae	*Caryophyllaceae	*Caryophyllaceae
Spinacia	*Spermatophyta	Caryophyllales	Amaranthaceae	*Amaranthaceae	*Amaranthaceae
Stachys	asterids	Lamiales	Lamiaceae	Lamioideae	*Lamioideae
Stellaria	*Spermatophyta	Caryophyllales	Caryophyllaceae	*Caryophyllaceae	*Caryophyllaceae
Teucrium	asterids	Lamiales	Lamiaceae	Teucrioideae	*Teucrioideae
Trifolium	rosids	Fabales	Fabaceae	Papilionoideae	Trifolieae
Trigonotis	asterids	*lamiids	Boraginaceae	*Boraginaceae	*Boraginaceae
Urtica	rosids	Rosales	Urticaceae	*Urticaceae	*Urticaceae
Valerianella	asterids	Dipsacales	Valerianaceae	*Valerianaceae	*Valerianaceae
Veronica	asterids	Lamiales	Plantaginaceae	*Plantaginaceae	Veroniceae
Vicia	rosids	Fabales	Fabaceae	Papilionoideae	Fabeae
Viola <angiosperm>	rosids	Malpighiales	Violaceae	*Violaceae	*Violaceae

## Sheet: Query_Sequences
The newly obtained ITS sequences used as examples for queries in molecular taxonomy
Collection data				Molecular taxonomy
Host	Geographical origin, source or herbarium number	Species (according to host and morphology)	GenBank accession no.	Closest neighbours in clustered dataset	Distance to closest neighbours
Atriplex hortensis	Spain, Asturias, Carcabada, MA-FUNGI27736	Pe. minor	FM863725	DQ643842 (TU 5)	0
Chenopodium album	Spain, Burgos, Cornudilla, MA-FUNGI27855	Pe. variabilis	FM863718	EU113303, EU113304, EU113305, EU113306, EU113307, EU113308, EU113310 (TU 49)	0
Chenopodium album	Spain, Gerona, Bolvir, MA-FUNGI27858	Pe. variabilis	FM863720	EU113303, EU113304, EU113310 (TU 49)	0
Chenopodium album	Spain, Gerona, Campdevanol, MA-FUNGI27857	Pe. variabilis	FM863723	EU113309 (TU 49)	0
Chenopodium album	Spain, Gerona, Isóvol, MA-FUNGI27859	Pe. variabilis	FM863716	EU113303, EU113304, EU113309, EU113310 (TU 49)	0
Chenopodium album	Spain, Gerona, Puigcerdá, MA-FUNGI27854	Pe. variabilis	FM863719	EU113309 (TU 49)	0
Chenopodium album	Spain, Huesca, Canfranc, MA-FUNGI27861	Pe. variabilis	FM863717	EU113303, EU113304, EU113309, EU113310 (TU 49)	0
Chenopodium album	Spain, La Rioja, Ansejo, MA-FUNGI27862	Pe. variabilis	FM863721	EU113303, EU113304, EU113305, EU113306, EU113307, EU113308, EU113310 (TU 49)	0
Chenopodium album	Spain, Lerida, Esterri d'Aneu, MA-FUNGI27856	Pe. variabilis	FM863724	AF528556, AF528557, AY211017, EF614959, EF614961, EF614962, EF614963, EF614965, EF614966, EF614967, EF614968 (TU 49)	0
Chenopodium album	Spain, Lérida, Las Bordas, MA-FUNGI27864	Pe. variabilis	FM863722	EU113303, EU113304, EU113310 (TU 49)	0
Chenopodium bonus-henricus	Spain, Asturias, Leitariegos, MA-FUNGI27850	Pe. boni-henrici	FM863712	AY198286, EF614952, EF614953 (TU 73)	0.00129366
Chenopodium bonus-henricus	Spain, Huesca, Baños de Benasque, MA-FUNGI27849	Pe. boni-henrici	FM863713	AY198286, EF614952, EF614953, EF614954 (TU 73)	0
Chenopodium bonus-henricus	Spain, Huesca, Baños de Panticosa, MA-FUNGI27847	Pe. boni-henrici	FM863715	AY198286, EF614952, EF614953, EF614954 (TU 73)	0
Chenopodium bonus-henricus	Spain, Huesca, Baños de Panticosa, MA-FUNGI27848	Pe. boni-henrici	FM863714	AY198286, EF614952, EF614953, EF614954 (TU 73)	0

## Sheet: References
Literature references for the main table
BELBAHRI, L., CALMIN, G., PAWLOWSKI, J. & LEFORT, F. (2005). Phylogenetic analysis and real time PCR detection of a presumably undescribed Peronospora species on sweet basil and sage. Mycol. Res. 109 (11): 1276-1287.
CHOI, Y.-J., HONG, S.-B. & SHIN, H.-D. (2005). A re-consideration of Pseudoperonospora cubensis and P. humuli based on molecular and morphological data. Mycol. Res. 109(7): 841-848.
CHOI, Y.-J., HONG, S.-B. & SHIN, H.-D. (2007). Re-consideration of Peronospora farinosa infecting Spinacia oleracea as distinct species, Peronospora effusa. Mycol. Res. 111(4): 381-391.
CHOI, Y.-J., DENCHEV, C.M. & SHIN, H.-D. (2008). Morphological and molecular analysis support the existence of host-specific Peronospora species infecting Chenopodium. Mycopathologia 165: 155-164.
CONSTANTINESCU, O. (1991). An annotated list of Peronospora names. Thunbergia 15: 1-110.
CONSTANTINESCU, O. & FATEHI, J. (2002). Peronospora-like fungi (Chromista, Peronosporales) parasitic on Brassicaceae and related hosts. Nova Hedwigia 74(3-4): 291-338.
CUNNINGTON, J.H. (2006). DNA sequence variation supports multiple host-specialised taxa in the Peronospora viciae complex (Chromista: Peronosporales). Nova Hedwigia 82(1-2): 23-29.
GUSTAVSSON, A. (1959). Studies on Nordic Peronosporas. I. Taxonomic revision. Opera Bot. 3(1): 1-271.
GAPONENKO, N.I. (1972). The Peronosporaceae species of Central Asia and Southern Kazakhstan. 321 pp. Akademiya Nauk Uzbekskoi S.S.R. Institut Botaniki, Tashkent.
GARCÍA-BLÁZQUEZ, G., GÖKER, M., VOGLMAYR, H., MARTÍN, M.P. TELLERÍA, M.T. & OBERWINKLER, F. (2008). Phylogeny of Peronospora, parasitic of Fabaceae, based on ITS sequences. Mycol. Res. 112: 502-512.
GÄUMANN, E. (1923). Beiträge zu einer Monographie der Gattung Peronospora Corda. Beitr. Kryptogamenfl. Schweiz 5: 1-360.
KOCHMAN, J. & MAJEWSKI, T. (1970). Grzyby (Mycota). Tom IV. Glonowce (Phycomycetes), Wroslikowe (Peronosporales). 308 pp. Panstwowe Wydawnictwo Naukowe. Warszawa.
LANDA, B.B., MONTES-BORREGO, M., MUÑOZ-LEDESMA, F.J. & JIMÉNEZ-DÍAZ, R.M. (2007). Phylogenetic analysis of downy mildew pathogens of opium poppy and PCR-based in planta and seed detection of Peronospora arborescens. Phytopathology 97: 1380-1390.
PALMATEER, A.J., HARMON, P.F. & SCHUBERT, T.S. (2008). Downy mildew of coleus (Solenostemon scutellarioides) caused by Peronospora sp. in Florida. Plant Pathology 57: 372.
